# Supplementary material
Source: PubMed Central journal article supplement (PMC6160370)
Supplement: NIHMS955751-supplement-Supplemental_Materials_and_Figures.pdf [file NIHMS955751-supplement-Supplemental_Materials_and_Figures.pdf]

## **Supplemental Materials**

### **Supplemental Methods**

#### **Aortic valve whole tissue collection**

Aortic valve (AV) leaflets were obtained from AV replacement surgeries for severe AV stenosis (Brigham and Women's Hospital (BWH) IRB protocol number: 2011P001703). Non-diseased AVs were obtained from autopsy (BWH IRB 214P001505). A total 25 tricuspid AVs were analyzed for all experiments.

#### **Aortic valve whole tissue sample preparation**

First, three donor leaflets were prepared for whole tissue proteomics and three for transcriptomics. The samples were immediately transferred from the operating room in DMEM (Lonza, Switzerland) on ice and snap-frozen within 30 minutes of extraction in the operating room. Samples were then dissected into three macroscopically distinct segments per leaflet: (1) non-diseased, (2) fibrotic, and (3) calcific under the guidance of near-infrared molecular imaging (Osteosense 680EX, Perkin Elmar, USA). The samples were incubated in 200 nM Osteosense 680EX in PBS on ice for 30 minutes and imaged with an Olympus MVX10 microscope (Olympus, Japan). In total, 27 sub-samples were prepared for proteomics and 9 for transcriptomics. We pulverized the samples in liquid nitrogen and re-suspended them in RIPA buffer (Thermo Fisher Scientific, USA) with 1%-protease inhibitor cocktail (Roche, Switzerland) for protein sampling or Trizol (Fisher Scientific, USA) for RNA extraction. The protein samples were subsequently prepared for label-free proteomics as shown below.

## **AV tissue layer sample preparation**

AVs obtained from three additional patients with severe aortic valve stenosis were used for tissue layer proteomics (donors CAVD1, CAVD2 and CAVD3). Non-diseased AV were obtained from autopsy donors (ND1 and ND2). The AV samples were handled in DMEM culture media (Lonza, Switzerland) on ice, were washed in PBS, and 1.5 mm slices covering the base and the tip of the AV were embedded in Optimal Cutting Temperature compound (OCT, Sakura Finetek, USA). The time between the extraction from the patient and the storage in a -80 °C freezer was maintained below 30 minutes. We then cut 15 µm sections and performed Verhoeff-van Gieson's stain (Richard-Allan Scientific Elastic Stain, ThermoFisher Scientific, USA) to visualize the anatomical structures of the three AV layers, fibrosa (F), spongiosa (S), and ventricularis (V). Using Verhoeff-van Gieson's stain as a template, we performed laser-capture microdissection on a Leica microscope (LMD6500 Microdissection System; LCM parameters: power: 50 mW, pulse duration: 2 ms) and pooled the extracted layer-specific tissue samples of 75 AV sections in RIPA buffer (Thermo Fisher Scientific, USA) supplemented with 1%-protease inhibitor cocktail (Roche, Switzerland). Preparations from 15 samples were sonicated (Branson Sonifier 450, USA). These samples were prepared for label-based, tandem mass tagging (TMT) proteomics.

## **AV in vitro migration assay and sample preparation**

AV leaflets from eight additional patients with severe AV stenosis were inspected by a pathologist to distinguish macroscopically the fibrosa from the ventricularis side. Endothelial cells were removed by scratching the surface with a razor blade. Longitudinal sections covering the base and the tip of the leaflet were cut and placed in tissue culture wells of a 6-well plate (Corning, USA) with the fibrosa or the ventricularis side of the leaflets facing down. The cells

were expanded in growth media (DMEM (Lonza, Switzerland) supplemented with 10% FCS and 1% streptomycin/penicillin (Corning, USA) until they reached 90% confluency and three different cell culture media conditions were introduced after passage 3: 1) control media [CM; DMEM (Lonza, Switzerland), 5% FCS (VWR, USA)]; 2) osteogenic media [OM; 5% FCS (VWR, USA), 2 mM  $\beta$ -glycerophosphate (EMD millipore, USA), 10 nM dexamethasone (MP Biomedicals, USA), 50  $\mu$ g/mL L-ascorbic acid (Sigma-Aldrich, USA)]; and 3) pro-calcifying media [PM; 5% FCS (VWR, USA), 2 mM  $\text{NaH}_2\text{PO}_4$  (pH 7.4) (Sigma-Aldrich, USA), 50  $\mu$ g/mL L-ascorbic acid (SIGMA-ALDRICH, USA)]. All cell culture media were supplemented with 1% streptomycin/penicillin. Prior to the first passage, the tissue samples were collected and histological sections generated. Van Gieson staining was performed to confirm the tissue orientation.

For the calcification assay, cell cultures were maintained for 21 days. Cells were fixed with 10% formalin for 15 minutes. Matrix calcium deposition was analyzed by Alizarin Red staining (Lifeline Cell Technology). Fixed cells were washed twice with distilled water and stained with 2% Alizarin Red for 15 minutes. Excess stain was washed twice with distilled water, and then images were scanned from the bottom side of culture plates. Alizarin Red staining was quantified by extracting the stain with 100 mmol/L cetylpyridinium chloride (Fisher Scientific, USA) for 3 hours, and the absorbance measured at 540 nm.

We collected protein samples at two time points for proteomics: 1) The 'day 0' cellular protein sample collection was conducted 24 hours after passage 3, and 2) 'day 7', seven days after the 'day 0' collection. The cells were washed twice in ice-cold PBS and 400 $\mu$ l RIPA buffer (Thermo Scientific, USA) supplemented with Protease Inhibitor Cocktail (Sigma Aldrich, USA) was added to lyse the cells. The cells were passed through a 25 G needle 10 times, and sonicated on ice (Branson Sonifier 450, USA). The samples were subsequently prepared for label-free proteomics.

## **Proteomics**

### *Label-free proteomics preparation for valvular whole tissue and in vitro migration samples.*

Protein extraction and proteolysis were performed with the methanol-chloroform method and trypsin (Gold Grade; Promega, Wisconsin)/ RapiGest (Waters, USA) respectively, as previously published<sup>1</sup>. Fifteen micrograms of protein were used per sample. The tryptic peptides were desalted using Oasis Hlb 1cc (10 mg) columns (Waters, USA), and dried with a tabletop speed vacuum (SPD1010, Thermo Fisher Scientific, USA). After re-suspension in 40 µl of 5% mass spectrometry grade acetonitrile (Thermo Fisher Scientific, USA) and 5% formic acid (Sigma-Aldrich, USA) the tryptic peptide samples were analyzed by liquid chromatography-mass spectrometry.

*Label-based, tandem mass tagging (TMT) for valvular laser microdissection samples.* Protein extraction and proteolysis were performed with the methanol-chloroform method (as above) and proteolyzed with Lys-C (WAKO Chemicals, USA). Peptides were labeled with TMT™ reagents (Table S1, Thermo Fisher Scientific, USA). Of note, to account for inter-TMT experimental variability, donor 2 (D2) was analyzed in duplicate in two independent TMT experiments (Table S1). The labeled peptides were combined and desalted using Oasis Hlb 1cc (10 mg) columns (Waters, USA). The OFF-gel system (Agilent, USA) fractionated the peptides into 24 fractions depending on their isoelectric focusing point (pH range of 3–10). The fractions were cleaned with Oasis columns, dried with a tabletop speed vacuum and re-suspended in 40 µl of 5% acetonitrile (MS grade, Thermo Fisher Scientific, USA) and 5% formic acid (Sigma-Aldrich, USA) for subsequent analysis by liquid chromatography-mass spectrometry.

## **Liquid chromatography tandem mass spectrometry (LC-MS/MS)**

*AV whole tissue label-free proteomics.* Peptide samples were analyzed with the high resolution/accuracy Q Exactive mass spectrometer fronted with a Nanospray FLEX ion source, and coupled to an Easy-nLC1000 HPLC pump (Thermo Scientific). The peptides were subjected to a dual column set-up: an Acclaim PepMap RSLC C18 trap column, 75  $\mu$ m X 20 mm; and an Acclaim PepMap RSLC C18 analytical column 75  $\mu$ m X 250 mm (Thermo Scientific). The analytical gradient was run at 300 nl/min from 5 to 18 % Solvent B (acetonitrile/0.1 % formic acid) for 120 minutes, followed by five minutes of 95 % Solvent B. Solvent A was 0.1 % formic acid. All reagents were HPLC-grade. The instrument was set to 140 K resolution, and the top 10 precursor ions (within a scan range of 380-2000 m/z) were subjected to higher energy collision induced dissociation (HCD, collision energy 25% (+/- 2.5%), isolation width 1.6 m/z, dynamic exclusion enabled (20 s), and resolution set to 17.5 K).

*AV tissue layer TMT proteomics.* Peptide samples were analyzed with the high resolution/accuracy LTQ-Orbitrap (Elite model) mass spectrometer fronted with a Nanospray FLEX ion source, and coupled to an Easy-nLC1000 HPLC pump (Thermo Scientific). The peptides were subjected to a dual column set-up: an Acclaim PepMap RSLC C18 trap column, 75  $\mu$ m X 20 mm; and an analytical column which was packed with 3  $\mu$ m, 100 Å pore size C18 resin (Bruker) in a 75  $\mu$ m X 200 mm long piece of fused silica capillary in-house. The analytical gradient was run at 350 nl/min from 10 to 25 % Solvent B (acetonitrile/0.1 % formic acid) for 90 minutes, followed by five minutes of 95 % Solvent B. Solvent A was 0.1 % formic acid. All reagents were HPLC-grade. The instrument was set to 120 K resolution, and the top 20 precursor ions (within a scan range of 380-2000 m/z) were subjected to higher energy collision induced dissociation (HCD, collision energy 40%, isolation width 3 m/z, dynamic exclusion enabled, starting m/z fixed at 120 m/z, and resolution set to 30 K) for peptide sequencing (MS/MS).

*In vitro migration label-free proteomics.* Peptide samples were analyzed with the LTQ-Orbitrap Elite configuration as above. The analytical gradient was run at 350 nl/min from 10 to 28 % Solvent B (acetonitrile/0.1 % formic acid) for 120 minutes, followed by five minutes of 95 % Solvent B. Solvent A was 0.1 % formic acid. All reagents were HPLC-grade. The instrument was set at 120 K resolution, and the top 20 precursor ions (within a scan range of 380-2000 m/z) were subjected to collision induced dissociation (CID, collision energy 35%) for peptide sequencing (MS/MS). Each sample was analyzed in triplicate.

### **RNA extraction, generation of the cDNA libraries and Illumina RNA-Seq**

RNA was purified from frozen tissue powders, using Trizol (Thermo Fisher, USA). The RNA quantity and quality was determined by an Agilent Bioanalyzer. Ribosomal RNA was removed by selecting RNAs with poly-A tails by annealing them to bead-bound poly-T oligonucleotides (Life Technologies, USA). The polyA subtypes were eluted by melting the annealed structures. Messenger RNAs were reverse transcribed using random hexamers (Invitrogen, USA). Double-stranded DNA synthesis was performed using Pol I and RNase H (Invitrogen, USA). End-repair was performed using polymerases and exonucleases to obtain dsDNA fragments with no overhangs. RNA-seq libraries were then constructed from the dsDNA using Nextera XT DNA sample preparation kit (Illumina, USA). RNA-seq library quality control was performed using High-Sensitivity DNA Tapes (Agilent, USA) on an Agilent Tape Station. Libraries were sequenced as 50bp paired end sequences on a single lane of the Illumina HiSeq2500 (Illumina, USA) to a target depth of >20 million reads.

### **Proteomics data analysis**

*Common data processing steps* - All MS/MS data were queried against the Human UniProt database (downloaded on August 01, 2014) using the HT-SEQUEST search algorithm, via the Proteome Discoverer (PD) Package (version 2.1, Thermo Scientific). Peptides were filtered based on a 1 % FDR<sup>2,3</sup>. Peptides assigned to a given protein group (Master protein), and not present in any other protein group, were considered as unique and used for quantification. A minimum of two unique peptides were included for each dataset.

Specifically, valve tissue TMT raw data acquired from the four TMT experiments (Table S1) were combined to create a merged analysis report in PD 2.1. The raw files were queried using a 10 ppm tolerance window in the MS1 search space, and a 0.02 Da fragment tolerance window for HCD. N-terminal acetylation, methionine oxidation and the tandem mass tags were set as variable modifications; and carbamidomethylation of cysteine was set as a fixed modification. For subsequent quantification analysis, the PD 2.1 normalized raw mass tag reporter ion intensities were exported. Valve whole tissue raw data were processed as above but without the tandem mass tags variables. The *in vitro* migration data were queried using a 10 ppm tolerance window in the MS1 search space, and a 0.6 Da fragment tolerance window for CID. N-terminal acetylation and methionine oxidation were set as variable modifications; and carbamidomethylation of cysteine was set as a fixed modification. The area under the curve of the chromatographic peak intensity as a label-free measure of peptide abundance of up to the top three abundant peptides was used for quantification in the two label-free experiments. The 'Precursor Ions Area Detector' module in PD 2.1 was activated for this quantification method.

*Normalization*: Four independent TMT experiments were collected (Table S1). In order to perform inter-donor comparisons across the TMT sets, we performed the sum-normalization of the three layers' reporter ion intensities for each donor<sup>4</sup>. In other words, we calculated proportions of three layers within one donor. Only proteins found in all four TMT experiments were analyzed further (Table S2, Fig. S5). In order to perform inter-dataset comparisons of the

label-free experiments, we divided AUC by the median AUC of the entire MS run<sup>5,6</sup>. The total number of proteins used in each study are provided in Table S2. For transcriptome analysis of the AV whole tissue, we employed empirical Bayesian normalization method provided by DESeq2<sup>7</sup>.

### **Immunohistochemistry and immunofluorescence**

AV samples from valve replacement surgeries were embedded perpendicularly in OCT and cut into 7 µm sections (Research Cryostat, Leica CM3050 S, Buffalo Grove, IL, USA). The sections were first dried for 20 minutes and then fixed for 5 minutes in 4% paraformaldehyde followed by a 5-minute rinse in distilled water and two 5 minute rinses in PBS. Sections were incubated for 3 minutes in a 0.3% hydrogen peroxide solution and rinsed with distilled water. Each section was then incubated in a 4% species appropriate blocking serum, prepared with PBS, for 45 minutes. This was followed with a 2-hour incubation at 37°C with the appropriate primary antibody (Table S5), followed by incubation for 1 hour with a species appropriate secondary antibody.

Streptavidin-coupled Alexa Fluor 488 and 594 antibodies (1:200, ThermoFisher Scientific, USA) were used. For double immunofluorescence labeling, samples were treated with an Avidin-biotin blocking solution (Vector Laboratories, USA), and then incubated for 45 minutes with a species appropriate 4% blocking serum for the second primary antibody. This step was followed by an overnight incubation at 4°C of the second primary antibody, and a 1-hour incubation with a species-appropriate, fluorescently conjugated secondary antibody with a different wavelength then was used for the first primary antibody. Sections were washed in PBS, mounted with DAPI (4,6-diamidino-2-phenylindole mounting medium (Vector Laboratories, USA)), coverslipped, and examined with a Nikon Eclipse Ti Confocal microscope (Nikon, USA).

### **Histological stains**



Human AV samples were embedded in OCT compound perpendicularly to obtain longitudinal sections, and 7 $\mu$ m cryosections were cut using a cryostat (Research Cryostat, Leica CM3050 S, USA). To detect AV tissue layers, Movat's Pentachrome staining was performed using the Russel-Movat's Pentachrome staining kit (American MasterTech KTRMP, USA). Sections were examined with a Nikon Eclipse 80i microscope (Nikon, Melville, NY, USA).

### **Proteomics and transcriptomics (RNA-seq) data visualization and statistical analysis**

For all proteomics and transcriptomics statistical analyses, we used in-house scripts of R v3.1 (<http://www.R-project.org/>) and Python v2.7.10 and v3.4 (<http://www.python.org>). To draw principal component analysis (PCA) plots and heat maps, we used Qlucore (<http://www.qlucore.com/>). For PCAs and heat maps, we filtered out genes or proteins by their q-value of multiple group comparisons. The q-value was calculated using Qlucore and its threshold were indicated in the figure legend. The q-value is the proportion of the rejected null hypotheses which are erroneously rejected and is a type of false discovery rate<sup>8</sup>. Histograms were drawn using Python's numpy<sup>9</sup> and matplotlib<sup>10</sup>. In the proteomics data, we replaced missing values with zero. For transcriptomics analysis of the AV whole tissue, we normalized the raw read count data using DESeq2<sup>7</sup>. We excluded low abundant transcripts by the fragments per kilobase of transcript per million maps (FPKM)  $\leq 1$  and normalized read value  $\leq 1$ . The Wald test of DESeq2 was used to compare the RNA abundances across the stages, and the FDR was used to adjust p-values. A density scatter plot (Fig. 2d) was drawn to compare the transcriptomics and the proteomics of the CAVD stage data. FPKM of the transcriptomics and median-normalized AUC of label free proteomics were compared using Spearman squared R (R<sup>2</sup>). Our label free proteomics and transcriptomics samples were not from the same donor, so we averaged FPKM and the normalized AUC by three stages (non-calcific, fibrotic and calcific stages). We used an in-house R script using ggplot2 to draw a histogram for a density scatter

plot. The enrichment analyses for the collagen, complement and SERPIN gene families were done using a two-sided Fisher's exact test considering the proteins detected in the proteomics experiments. The gene families were downloaded from the HUGO Gene Nomenclature Committee website ([www.genenames.org](http://www.genenames.org)).

### **Determination of the layer- and stage-specific proteins and genes**

To resolve proteins and genes obtained from proteomic and transcriptomic measurements into various calcification stages and AV leaflet layers, we determined the over-represented proteins/genes in each respective condition by following the criteria below:

a) For CAVD Disease Stage proteomics, a protein was assigned to the non-diseased (ND), fibrotic (F), or calcific (C) stage if its normalized mean AUC fold change (FC) was greater than 1.2 with respect to the other stages (e.g. a protein is classified as calcific if  $C/F > 1.2$  and  $C/ND > 1.2$ ). Similarly, for CAVD Layer proteomics, a protein was assigned to the fibrosa (F), spongiosa (S) or ventricularis (V) layer if its average normalized TMT fold change (FC) is greater than 1.2 with respect to the other layers (e.g. a protein is classified into fibrosa if  $F/S > 1.2$  and  $F/V > 1.2$ ).

b) For CAVD Disease Stage transcriptomics, genes with an FDR  $< 0.05$  in at least one stage were considered and a gene was assigned to a stage if its DESeq2 normalized count fold change (FC) was greater than 1.2 with respect to the other stages.

Together, these criteria ensure that a gene/protein is overrepresented in one stage/layer only, while being simultaneously underrepresented in the remaining two stages/layers. We note that the proteins and genes considered here are expressed in all stages and layers. Therefore, what is referred to as layer- and stage-specific is rather the result of the above classification, where a protein/gene is assigned to only one stage or layer, allowing for the spatiotemporal resolution of calcification in the AV.

c) For the CAVD *in vitro* cell proteomics, the expression levels of fibrosa (F) and ventricularis (V) on 'Day 0' were averaged over donors and proteins with a normalized mean AUC fold change (FC) greater than 1.5 with respect to the other layer were considered as over-represented (e.g. a protein is classified as belonging to the fibrosa layer if  $FC(F/V) > 1.5$  and ventricularis layer if  $FC(F/V) < 1/1.5$ ). For the different media conditions, the expression levels of fibrosa (F) on 'Day 7' were averaged over donors and proteins with a normalized mean AUC fold change (FC) greater than 1.2 for the given condition (pro-calcifying media (PM) or osteogenic media (OM)) with respect to normal media (NM) were considered as over-represented (e.g. a protein is classified as over-represented in PM if  $FC(PM/NM) > 1.2$  and OM if  $FC(OM/NM) > 1.2$ ).

## **Network analysis**

### *Pathway enrichment analysis and pathway maps.*

Using ConsensusPathDB<sup>11</sup>, the gene sets corresponding to each layer and stage were tested for enrichment by a hypergeometric test and adjusted for multiple comparisons using the Benjamini-Hochberg method for controlling false discovery rate (FDR). For the pathway enrichment analysis (pathway data retrieved from <http://consensuspathdb.org/> in February 2017), the canonical pathways from KEGG, Biocarta, and Reactome were considered<sup>12</sup>. This resulted in 301 pathways from KEGG comprising 7,121 genes, 252 pathways from Biocarta comprising 1,408 genes, and 1,764 pathways from Reactome comprising 10,095 genes, which together defined a pathway space of 2,317 pathways consisting of 11,447 genes. Pathways with FDR adjusted p-value (q-value) < 0.05 are considered as significantly enriched. The pathway networks consist of pathways as the nodes and the shared genes between pathways as the edges. Node size corresponds to  $-\log(q\text{-value})$  and edge weight (thickness) corresponds to the gene overlap between pairs of pathways measured by the Jaccard index J, which is defined as

$$J = \frac{s_A \cap s_B}{s_A \cup s_B}$$

where  $s_A$  and  $s_B$  are the set of proteins detected in proteomics that belong to pathway  $A$  and pathway  $B$ , respectively. Edges with a Jaccard index  $< 0.1$  were discarded in the visualization for clarity. The networks visualizations were made using Gephi v0.8.2 <sup>2</sup>.

*Stage- and layer-specific subnetworks and closeness of the calcific stage subnetwork to human diseases.*

The stage- and layer-specific subnetworks were built by mapping the layer- and stage-specific proteins (from the CAVD Disease Stage proteomics and CAVD Layer proteomics data) onto the protein-protein interaction (PPI) network (described in detail below). Concretely, the subnetworks are the induced subgraphs  $G_{PPI}[S_{layer}]$  and  $G_{PPI}[S_{stage}]$  consisting of layer- and stage-specific nodes and all of the edges that connect them, where  $G_{PPI}$  is the PPI network, and  $S_{layer}$  and  $S_{stage}$  are the sets of layer- and stage-specific proteins.

The closeness of the calcific stage subnetwork to disease molecules was measured in terms of the average shortest distance. The average shortest distance  $D$  to disease genes in a module was measured by calculating the shortest distance between each calcific stage gene  $s$  and all disease genes  $t$  and then averaging over all calcific stage genes  $s$  such that

$$d_s = \sum_{t \in \mathbb{T}} d_{st}$$

and

$$D = \sum_{s \in \mathbb{S}} d_s,$$

where  $d_{st}$  is the shortest distance between  $s$  and  $t$  and  $\mathbb{S}$  and  $\mathbb{T}$  are the set of genes in the calcific stage proteins subnetwork and disease genes, respectively. In order to compare this average shortest distance value to a null model, the average shortest distance of the same number of randomly selected genes to disease genes was calculated for  $N=1,000$  realizations. To correct for degree (i.e., the number of connections of a gene) bias, the random selection was done in a degree-preserving manner where all genes were binned according to their degree and random genes were selected uniformly at random from their corresponding degree bin. Finally, z-scores and empirical p-values were calculated by

$$z = \frac{D - \langle D_r \rangle}{\sigma_{D_r}}$$

and

$$p_{emp.} = P(D_r < D),$$

respectively, where  $D_r$  is the average shortest distance of a randomized instance,  $\langle D_r \rangle$  is the mean of the average shortest distance of all randomized instances, and  $\sigma_{D_r}$  is their standard deviation. The disease genes were obtained from the DiseaseConnect (<http://disease-connect.org>)<sup>13</sup> (using entries with evidence from Genome-Wide Association Studies (GWAS) and Online Mendelian Inheritance in Man (OMIM) (<http://www.omim.org/>) and MalaCards (<http://www.malacards.org/>)<sup>14</sup> databases, for a range of diseases (Table S6) covering a broad spectrum including cardiovascular, metabolic, malignant, and autoimmune disorders.

Calcification-related diseases served as positive controls (pseudoxanthoma elasticum,  $p < 0.001$ ; calcification diseases [including vascular calcification, basal ganglia calcification, calcification of the joints and arteries, arterial calcification of infancy, and aortic valve calcification (contributing LPA)],  $p < 0.001$ ]. The underlying protein-protein interaction (PPI) network onto which the calcific stage and disease genes were mapped consists of curated physical protein-protein interactions

with experimental support, including binary interactions, protein complexes, enzyme-coupled reactions, signaling interactions, kinase-substrate pairs, regulatory interactions and manually curated interactions from literature, the details of which were described previously<sup>15</sup>. The PPI network was treated as undirected, due to the limited availability of unambiguous and robust information on the directionality of links in the available datasets<sup>15</sup>. Network measures including shortest distances and centralities were calculated using the NetworkX package<sup>16</sup> 1.9 in Python v2.7.10.

## Supplemental Tables

| TMT channel / reporter ion |          |          |          |          |          |          |
|----------------------------|----------|----------|----------|----------|----------|----------|
| <i>n-plex exp.</i>         | 126      | 127      | 128      | 129      | 130      | 131      |
| 6                          | CAVD1-1F | CAVD1-1S | CAVD1-1V | CAVD1-2F | CAVD1-2S | CAVD1-2V |
| 6                          | CAVD2-1F | CAVD2-1S | CAVD2-1V | CAVD3F   | CAVD3S   | CAVD3V   |
| 6                          | CAVD2-2F | CAVD2-2S | CAVD2-2V | ND1F     | ND1S     | ND1V     |
| 3                          | ND2F     | ND2S     | ND2V     |          |          |          |

**Supplemental Table 1:** TMT channel, and donor and layer assignments. Valve replacement donors, D1, D2 and D3; autopsy donors, A1 and A2; fibrosa (F), spongiosa (S) and ventricularis (V). D2 was analyzed in two independent TMT experiments to evaluate inter-data set variability.

| Study                                  | ≥2 unique peptides | Detected in all TMT experiments |
|----------------------------------------|--------------------|---------------------------------|
| CAVD stages                            | 1744               | -                               |
| CAVD layers                            | 1872               | 856                             |
| CAVD in vitro (Day0)                   | 2188               | -                               |
| CAVD in vitro (TimeSeries: Day0, Day7) | 2586               | -                               |

**Supplemental Table 2:** Proteomics data overview

### Supplemental Table 3

#### CAVD Disease Stage Pathways

##### Non-diseased CAVD stage

| p-value  | q-value  | Pathway                                                                                                |
|----------|----------|--------------------------------------------------------------------------------------------------------|
| 6.78E-16 | 2.36E-13 | L13a-mediated translational silencing of Ceruloplasmin expression                                      |
| 6.78E-16 | 2.36E-13 | 3, -UTR-mediated translational regulation                                                              |
| 2.89E-15 | 5.04E-13 | Cap-dependent Translation Initiation                                                                   |
| 2.89E-15 | 5.04E-13 | Eukaryotic Translation Initiation                                                                      |
| 7.36E-15 | 1.01E-12 | GTP hydrolysis and joining of the 60S ribosomal subunit                                                |
| 8.75E-15 | 1.01E-12 | Formation of a pool of free 40S subunits                                                               |
| 1.40E-14 | 1.39E-12 | Neutrophil degranulation                                                                               |
| 1.73E-14 | 1.50E-12 | Translation                                                                                            |
| 2.58E-14 | 1.99E-12 | Nonsense Mediated Decay (NMD) independent of the Exon Junction Complex (EJC)                           |
| 1.35E-13 | 9.41E-12 | Selenocysteine synthesis                                                                               |
| 1.64E-13 | 1.04E-11 | Eukaryotic Translation Termination                                                                     |
| 2.08E-13 | 1.21E-11 | ECM-receptor interaction (human)                                                                       |
| 2.73E-13 | 1.36E-11 | Nonsense Mediated Decay (NMD) enhanced by the Exon Junction Complex (EJC)                              |
| 2.73E-13 | 1.36E-11 | Nonsense-Mediated Decay (NMD)                                                                          |
| 1.03E-12 | 4.76E-11 | Peptide chain elongation                                                                               |
| 2.52E-12 | 1.10E-10 | Eukaryotic Translation Elongation                                                                      |
| 4.96E-12 | 2.03E-10 | SRP-dependent cotranslational protein targeting to membrane                                            |
| 1.21E-11 | 4.68E-10 | Selenoamino acid metabolism                                                                            |
| 2.05E-11 | 7.50E-10 | Translation initiation complex formation                                                               |
| 2.56E-11 | 8.92E-10 | Activation of the mRNA upon binding of the cap-binding complex and eIFs, and subsequent binding to 43S |
| 3.00E-11 | 9.94E-10 | Metabolism of proteins                                                                                 |
| 1.08E-10 | 3.43E-09 | Extracellular matrix organization                                                                      |
| 1.30E-10 | 3.93E-09 | Focal adhesion (human)                                                                                 |
| 2.11E-10 | 6.12E-09 | Ribosomal scanning and start codon recognition                                                         |
| 2.28E-10 | 6.36E-09 | Platelet activation, signaling and aggregation                                                         |
| 4.68E-10 | 1.25E-08 | Formation of the ternary complex, and subsequently, the 43S complex                                    |
| 1.10E-09 | 2.82E-08 | Metabolism of amino acids and derivatives                                                              |
| 1.51E-09 | 3.76E-08 | Ribosome (human)                                                                                       |
| 3.66E-09 | 8.79E-08 | Hemostasis                                                                                             |
| 7.77E-09 | 1.80E-07 | Platelet Aggregation (Plug Formation)                                                                  |
| 1.57E-08 | 3.53E-07 | Innate Immune System                                                                                   |
| 6.08E-07 | 1.32E-05 | Platelet activation (human)                                                                            |
| 1.29E-06 | 2.71E-05 | GP1b-IX-V activation signalling                                                                        |
| 2.79E-06 | 5.70E-05 | Prefoldin mediated transfer of substrate to CCT/TriC                                                   |



|            |            |                                                                    |
|------------|------------|--------------------------------------------------------------------|
| 3.56E-06   | 7.09E-05   | Molecules associated with elastic fibres                           |
| 6.21E-06   | 0.00012002 | Platelet Adhesion to exposed collagen                              |
| 7.44E-06   | 0.00014002 | Non-integrin membrane-ECM interactions                             |
| 8.20E-06   | 0.00015016 | Collagen formation                                                 |
| 8.72E-06   | 0.00015307 | Cooperation of Prefoldin and TriC/CCT in actin and tubulin folding |
| 8.80E-06   | 0.00015307 | Collagen chain trimerization                                       |
| 1.07E-05   | 0.00018143 | Elastic fibre formation                                            |
| 1.53E-05   | 0.00025326 | Laminin interactions                                               |
| 1.95E-05   | 0.00031555 | Formation of tubulin folding intermediates by CCT/TriC             |
| 2.16E-05   | 0.00034129 | Transport to the Golgi and subsequent modification                 |
| 2.26E-05   | 0.00035004 | Formation of Fibrin Clot (Clotting Cascade)                        |
| 2.46E-05   | 0.00037212 | Sema4D in semaphorin signaling                                     |
| 2.58E-05   | 0.00038247 | Regulation of actin cytoskeleton (human)                           |
| 2.89E-05   | 0.00041879 | PI3K-Akt signaling pathway (human)                                 |
| 3.07E-05   | 0.00043627 | Integrin alphaIIb beta3 signaling                                  |
| 3.33E-05   | 0.00046415 | ECM proteoglycans                                                  |
| 3.80E-05   | 0.00051859 | MET promotes cell motility                                         |
| 4.58E-05   | 0.00061349 | Platelet degranulation                                             |
| 4.93E-05   | 0.00064806 | ER to Golgi Anterograde Transport                                  |
| 6.41E-05   | 0.00082599 | Amoebiasis (human)                                                 |
| 6.58E-05   | 0.00083316 | Response to elevated platelet cytosolic Ca <sup>2+</sup>           |
| 7.93E-05   | 0.00098602 | Signaling by MET                                                   |
| 8.46E-05   | 0.00103351 | Syndecan interactions                                              |
| 0.00010428 | 0.00125139 | Assembly of collagen fibrils and other multimeric structures       |
| 0.00012362 | 0.00145825 | Integrin cell surface interactions                                 |
| 0.00013246 | 0.00153651 | Salmonella infection (human)                                       |
| 0.0001528  | 0.00174346 | Immune System                                                      |
| 0.00016727 | 0.00186479 | Sema4D induced cell migration and growth-cone collapse             |
| 0.0001688  | 0.00186479 | Collagen biosynthesis and modifying enzymes                        |
| 0.00017828 | 0.00193876 | Metabolism                                                         |
| 0.0001881  | 0.00201411 | Protein digestion and absorption (human)                           |
| 0.00021957 | 0.00229011 | Pathogenic Escherichia coli infection (human)                      |
| 0.00022046 | 0.00229011 | Spliceosome (human)                                                |
| 0.00022609 | 0.00231407 | Proteoglycans in cancer (human)                                    |
| 0.00025873 | 0.00260976 | Pathways in cancer (human)                                         |
| 0.00030706 | 0.00305306 | Hematopoietic cell lineage (human)                                 |
| 0.00037013 | 0.00362829 | Cell-extracellular matrix interactions                             |
| 0.00039178 | 0.00378722 | COPI-mediated anterograde transport                                |
| 0.00050544 | 0.00481903 | Influenza Virus Induced Apoptosis                                  |
| 0.0005482  | 0.00515601 | Hypertrophic cardiomyopathy (HCM) (human)                          |
| 0.0005878  | 0.00545477 | mcalpain and friends in cell motility                              |

|            |            |                                                                             |
|------------|------------|-----------------------------------------------------------------------------|
| 0.0006397  | 0.00585833 | Protein folding                                                             |
| 0.00068664 | 0.00614018 | Phagosome (human)                                                           |
| 0.00068812 | 0.00614018 | Asparagine N-linked glycosylation                                           |
| 0.00070846 | 0.00624164 | Cell-Cell communication                                                     |
| 0.00081103 | 0.00703498 | Cell junction organization                                                  |
| 0.00081873 | 0.00703498 | Endocytosis (human)                                                         |
| 0.00087408 | 0.00741899 | Dilated cardiomyopathy (human)                                              |
| 0.00091776 | 0.0076959  | MET activates PTK2 signaling                                                |
| 0.00098934 | 0.00819742 | mRNA Splicing - Major Pathway                                               |
| 0.00115164 | 0.00942986 | Arrhythmogenic right ventricular cardiomyopathy (ARVC) (human)              |
| 0.00120605 | 0.00976059 | Folding of actin by CCT/TriC                                                |
| 0.00124973 | 0.00977316 | Cleavage of Growing Transcript in the Termination Region                    |
| 0.00124973 | 0.00977316 | RNA Polymerase II Transcription Termination                                 |
| 0.00124973 | 0.00977316 | Post-Elongation Processing of the Transcript                                |
| 0.00128993 | 0.00997544 | GPVI-mediated activation cascade                                            |
| 0.0013374  | 0.01021875 | Intrinsic Pathway of Fibrin Clot Formation                                  |
| 0.00135075 | 0.01021875 | RHO GTPases Activate WASPs and WAVES                                        |
| 0.00142487 | 0.01066353 | mRNA Splicing                                                               |
| 0.00159056 | 0.01153155 | RHO GTPases activate PAKs                                                   |
| 0.00159056 | 0.01153155 | how progesterone initiates the oocyte maturation                            |
| 0.00159056 | 0.01153155 | Post-chaperonin tubulin folding pathway                                     |
| 0.00163081 | 0.01170146 | RHO GTPases activate KTN1                                                   |
| 0.00186279 | 0.01318334 | Chaperonin-mediated protein folding                                         |
| 0.00187522 | 0.01318334 | proteasome complex                                                          |
| 0.0021933  | 0.01526538 | stathmin and breast cancer resistance to antimicrotubule agents             |
| 0.00240563 | 0.01657738 | Binding and Uptake of Ligands by Scavenger Receptors                        |
| 0.00273387 | 0.01865467 | ERKs are inactivated                                                        |
| 0.00281815 | 0.01904304 | TGF-beta signaling pathway (human)                                          |
| 0.00293735 | 0.01965764 | transcription factor creb and its extracellular signals                     |
| 0.00312378 | 0.0206925  | RHO GTPase Effectors                                                        |
| 0.00315144 | 0.0206925  | Axon guidance                                                               |
| 0.00321866 | 0.02093631 | Small cell lung cancer (human)                                              |
| 0.00335028 | 0.02159067 | Vesicle-mediated transport                                                  |
| 0.00357721 | 0.02284163 | Golgi-to-ER retrograde transport                                            |
| 0.00383756 | 0.02428126 | fc epsilon receptor i signaling in mast cells                               |
| 0.00411714 | 0.02581559 | Processing of Capped Intron-Containing Pre-mRNA                             |
| 0.004208   | 0.02614972 | Semaphorin interactions                                                     |
| 0.0048321  | 0.02976232 | N-glycan trimming and elongation in the cis-Golgi                           |
| 0.00517877 | 0.03142586 | agrin in postsynaptic differentiation                                       |
| 0.00519249 | 0.03142586 | MAPK signaling pathway (human)                                              |
| 0.00551162 | 0.03306972 | erk and pi-3 kinase are necessary for collagen binding in corneal epithelia |

|            |            |                                                                                 |
|------------|------------|---------------------------------------------------------------------------------|
| 0.00557567 | 0.03316811 | B cell receptor signaling pathway (human)                                       |
| 0.00608146 | 0.03556887 | role of pi3k subunit p85 in regulation of actin organization and cell migration |
| 0.00608146 | 0.03556887 | TGF-beta receptor signaling in EMT (epithelial to mesenchymal transition)       |
| 0.00664216 | 0.03852453 | mRNA Splicing - Minor Pathway                                                   |
| 0.00714067 | 0.04061491 | Synthesis of Lipoxins (LX)                                                      |
| 0.00714067 | 0.04061491 | Protein repair                                                                  |
| 0.00717764 | 0.04061491 | Regulation of signaling by CBL                                                  |
| 0.00775715 | 0.04354014 | AGE-RAGE signaling pathway in diabetic complications (human)                    |
| 0.00819964 | 0.0456556  | Bacterial invasion of epithelial cells (human)                                  |
| 0.00838331 | 0.04630783 | role of mal in rho-mediated activation of srf                                   |
| 0.00927327 | 0.05082047 | NCAM1 interactions                                                              |
| 0.00984898 | 0.05355382 | Clearance of Nuclear Envelope Membranes from Chromatin                          |
| 0.01041996 | 0.05621929 | Factors involved in megakaryocyte development and platelet production           |
| 0.01113193 | 0.05869563 | Scavenging by Class A Receptors                                                 |
| 0.01113193 | 0.05869563 | prion pathway                                                                   |
| 0.01113193 | 0.05869563 | Negative regulation of MET activity                                             |
| 0.01191299 | 0.06234164 | Signaling by BRAF and RAF fusions                                               |
| 0.01231652 | 0.06397235 | Tight junction (human)                                                          |
| 0.01267843 | 0.06488375 | ERK/MAPK targets                                                                |
| 0.01267843 | 0.06488375 | phosphoinositides and their downstream targets                                  |
| 0.01293797 | 0.06525236 | Sema4D mediated inhibition of cell attachment and migration                     |
| 0.01293797 | 0.06525236 | cell to cell adhesion signaling                                                 |
| 0.01318791 | 0.06603444 | Gene Expression                                                                 |
| 0.01389708 | 0.06894832 | Insulin signaling pathway (human)                                               |
| 0.01434162 | 0.06894832 | intrinsic prothrombin activation pathway                                        |
| 0.01437825 | 0.06894832 | Gap junction (human)                                                            |
| 0.01443804 | 0.06894832 | Post-translational protein modification                                         |
| 0.0144633  | 0.06894832 | Oncogenic MAPK signaling                                                        |
| 0.0144633  | 0.06894832 | mRNA 3,-end processing                                                          |
| 0.0144633  | 0.06894832 | Post-Elongation Processing of Intron-Containing pre-mRNA                        |
| 0.01538572 | 0.07236856 | Alzheimer,s disease (human)                                                     |
| 0.01538872 | 0.07236856 | Shigellosis (human)                                                             |
| 0.01612253 | 0.0750455  | ER-Phagosome pathway                                                            |
| 0.01635289 | 0.0750455  | Renal cell carcinoma (human)                                                    |
| 0.01638925 | 0.0750455  | MET activates RAP1 and RAC1                                                     |
| 0.01638925 | 0.0750455  | Crosslinking of collagen fibrils                                                |
| 0.01655477 | 0.07530799 | Activated TLR4 signalling                                                       |
| 0.01686963 | 0.07575006 | Proteasome (human)                                                              |
| 0.01686963 | 0.07575006 | Cooperation of PDCL (PhLP1) and TRiC/CCT in G-protein beta folding              |
| 0.01735644 | 0.07700925 | Central carbon metabolism in cancer (human)                                     |
| 0.01737134 | 0.07700925 | Signaling by Rho GTPases                                                        |

|            |            |                                                                              |
|------------|------------|------------------------------------------------------------------------------|
| 0.01757374 | 0.07741342 | Fc gamma R-mediated phagocytosis (human)                                     |
| 0.01802197 | 0.07779577 | EGFR downregulation                                                          |
| 0.01802197 | 0.07779577 | Nuclear Events (kinase and transcription factor activation)                  |
| 0.01802197 | 0.07779577 | WNT ligand biogenesis and trafficking                                        |
| 0.01844296 | 0.07779577 | MyD88:Mal cascade initiated on plasma membrane                               |
| 0.01844296 | 0.07779577 | Toll Like Receptor TLR1:TLR2 Cascade                                         |
| 0.01844296 | 0.07779577 | Toll Like Receptor TLR6:TLR2 Cascade                                         |
| 0.01844296 | 0.07779577 | Toll Like Receptor 2 (TLR2) Cascade                                          |
| 0.01948405 | 0.08169215 | Fc epsilon RI signaling pathway (human)                                      |
| 0.02004048 | 0.08312895 | DARPP-32 events                                                              |
| 0.02018505 | 0.08312895 | Signal attenuation                                                           |
| 0.02018505 | 0.08312895 | SLBP independent Processing of Histone Pre-mRNAs                             |
| 0.02060924 | 0.08437666 | COPII (Coat Protein 2) Mediated Vesicle Transport                            |
| 0.02143927 | 0.08726159 | Intra-Golgi and retrograde Golgi-to-ER traffic                               |
| 0.02298506 | 0.09300932 | Adherens junction (human)                                                    |
| 0.02407959 | 0.09396282 | Toll-Like Receptors Cascades                                                 |
| 0.02414109 | 0.09396282 | Arginine and proline metabolism (human)                                      |
| 0.02423668 | 0.09396282 | Chronic myeloid leukemia (human)                                             |
| 0.02430821 | 0.09396282 | regulators of bone mineralization                                            |
| 0.02430821 | 0.09396282 | apoptotic dna-fragmentation and tissue homeostasis                           |
| 0.02430821 | 0.09396282 | SLBP Dependent Processing of Replication-Dependent Histone Pre-mRNAs         |
| 0.02430821 | 0.09396282 | Dermatan sulfate biosynthesis                                                |
| 0.02430821 | 0.09396282 | insulin signaling pathway                                                    |
| 0.02443573 | 0.09396282 | COPI-independent Golgi-to-ER retrograde traffic                              |
| 0.02568504 | 0.09822413 | Toll Like Receptor 4 (TLR4) Cascade                                          |
| 0.02681245 | 0.10197521 | Negative regulation of FGFR3 signaling                                       |
| 0.02696179 | 0.10198592 | Diseases of signal transduction                                              |
| 0.02825177 | 0.10311627 | Transport of Mature mRNA derived from an Intron-Containing Transcript        |
| 0.02867483 | 0.10311627 | Osteoclast differentiation (human)                                           |
| 0.02874218 | 0.10311627 | protein kinase a at the centrosome                                           |
| 0.02874218 | 0.10311627 | rho-selective guanine exchange factor akap13 mediates stress fiber formation |
| 0.02874218 | 0.10311627 | CD28 dependent Vav1 pathway                                                  |
| 0.02874218 | 0.10311627 | PECAM1 interactions                                                          |
| 0.02874218 | 0.10311627 | phospholipase c-epsilon pathway                                              |
| 0.02874218 | 0.10311627 | Host Interactions with Influenza Factors                                     |
| 0.02874218 | 0.10311627 | how does salmonella hijack a cell                                            |
| 0.02874218 | 0.10311627 | eNOS activation                                                              |
| 0.0293082  | 0.104074   | Ca-dependent events                                                          |
| 0.0293082  | 0.104074   | Asthma (human)                                                               |
| 0.03076566 | 0.10869491 | Huntington,s disease (human)                                                 |
| 0.03113517 | 0.10944484 | Apoptotic execution phase                                                    |

|            |            |                                                                           |
|------------|------------|---------------------------------------------------------------------------|
| 0.03192249 | 0.11040658 | MAPK targets/ Nuclear events mediated by MAP kinases                      |
| 0.03192249 | 0.11040658 | Negative regulation of FGFR4 signaling                                    |
| 0.03192249 | 0.11040658 | beta-Alanine metabolism (human)                                           |
| 0.03251672 | 0.11040658 | UCH proteinases                                                           |
| 0.03305092 | 0.11040658 | Glutathione metabolism (human)                                            |
| 0.03347096 | 0.11040658 | RHO GTPases activate IQGAPs                                               |
| 0.03347096 | 0.11040658 | Initiation of Nuclear Envelope Reformation                                |
| 0.03347096 | 0.11040658 | Nuclear Envelope Reassembly                                               |
| 0.03347096 | 0.11040658 | Activation of DNA fragmentation factor                                    |
| 0.03347096 | 0.11040658 | Apoptosis induced DNA fragmentation                                       |
| 0.03347096 | 0.11040658 | attenuation of gpcr signaling                                             |
| 0.03347096 | 0.11040658 | Advanced glycosylation endproduct receptor signaling                      |
| 0.03347096 | 0.11040658 | extrinsic prothrombin activation pathway                                  |
| 0.03465464 | 0.11377185 | bcr signaling pathway                                                     |
| 0.03561257 | 0.11636782 | NCAM signaling for neurite out-growth                                     |
| 0.03636398 | 0.1182679  | Signaling by PDGF                                                         |
| 0.03750384 | 0.11864851 | role of egf receptor transactivation by gpccs in cardiac hypertrophy      |
| 0.03750384 | 0.11864851 | phospholipids as signalling intermediaries                                |
| 0.03750384 | 0.11864851 | rho cell motility signaling pathway                                       |
| 0.03750384 | 0.11864851 | bioactive peptide induced signaling pathway                               |
| 0.03750384 | 0.11864851 | Negative regulation of FGFR1 signaling                                    |
| 0.03750384 | 0.11864851 | Glucagon signaling in metabolic regulation                                |
| 0.03777558 | 0.11896745 | Regulation of actin dynamics for phagocytic cup formation                 |
| 0.03817935 | 0.11902878 | Membrane Trafficking                                                      |
| 0.03847913 | 0.11902878 | il 2 signaling pathway                                                    |
| 0.03847913 | 0.11902878 | Spry regulation of FGF signaling                                          |
| 0.03847913 | 0.11902878 | phosphorylation of mek1 by cdk5/p35 down regulates the map kinase pathway |
| 0.03918576 | 0.12067828 | COPI-dependent Golgi-to-ER retrograde traffic                             |
| 0.04045014 | 0.12246299 | Viral carcinogenesis (human)                                              |
| 0.04046909 | 0.12246299 | integrin signaling pathway                                                |
| 0.04046909 | 0.12246299 | Negative regulation of FGFR2 signaling                                    |
| 0.04046909 | 0.12246299 | Cargo concentration in the ER                                             |
| 0.04093096 | 0.12332445 | Opioid Signalling                                                         |
| 0.04354928 | 0.12794644 | Signaling by high-kinase activity BRAF mutants                            |
| 0.04354928 | 0.12794644 | Glucagon-like Peptide-1 (GLP1) regulates insulin secretion                |
| 0.0437518  | 0.12794644 | InlB-mediated entry of Listeria monocytogenes into host cell              |
| 0.0437518  | 0.12794644 | Constitutive Signaling by EGFRvIII                                        |
| 0.0437518  | 0.12794644 | Signaling by EGFRvIII in Cancer                                           |
| 0.0437518  | 0.12794644 | transcription regulation by methyltransferase of carm1                    |
| 0.0437518  | 0.12794644 | repression of pain sensation by the transcriptional regulator dream       |
| 0.04596624 | 0.13330211 | rRNA modification in the nucleus and cytosol                              |

|            |            |                                                                  |
|------------|------------|------------------------------------------------------------------|
| 0.04596624 | 0.13330211 | rRNA processing in the nucleus and cytosol                       |
| 0.04837757 | 0.1371805  | G alpha (12/13) signalling events                                |
| 0.04837757 | 0.1371805  | Transport of Mature Transcript to Cytoplasm                      |
| 0.04900813 | 0.1371805  | Developmental Biology                                            |
| 0.0492746  | 0.1371805  | Regulation of TLR by endogenous ligand                           |
| 0.0492746  | 0.1371805  | p130Cas linkage to MAPK signaling for integrins                  |
| 0.0492746  | 0.1371805  | GRB2:SOS provides linkage to MAPK signaling for Integrins        |
| 0.0492746  | 0.1371805  | Constitutive Signaling by Ligand-Responsive EGFR Cancer Variants |
| 0.0492746  | 0.1371805  | Signaling by Ligand-Responsive EGFR Variants in Cancer           |
| 0.0492746  | 0.1371805  | Signaling by EGFR in Cancer                                      |
| 0.0492746  | 0.1371805  | PKA activation                                                   |

### Fibrotic CAVD stage

| p-value  | q-value  | Pathway                                                                      |
|----------|----------|------------------------------------------------------------------------------|
| 2.60E-17 | 2.01E-14 | Metabolism                                                                   |
| 9.81E-17 | 3.80E-14 | Neutrophil degranulation                                                     |
| 3.96E-14 | 1.02E-11 | SRP-dependent cotranslational protein targeting to membrane                  |
| 5.96E-14 | 1.15E-11 | Translation                                                                  |
| 5.12E-13 | 7.92E-11 | Eukaryotic Translation Termination                                           |
| 7.69E-13 | 9.92E-11 | Eukaryotic Translation Elongation                                            |
| 2.51E-12 | 2.45E-10 | Peptide chain elongation                                                     |
| 3.58E-12 | 2.45E-10 | Formation of a pool of free 40S subunits                                     |
| 3.74E-12 | 2.45E-10 | Selenocysteine synthesis                                                     |
| 3.79E-12 | 2.45E-10 | GTP hydrolysis and joining of the 60S ribosomal subunit                      |
| 3.79E-12 | 2.45E-10 | L13a-mediated translational silencing of Ceruloplasmin expression            |
| 3.79E-12 | 2.45E-10 | 3', -UTR-mediated translational regulation                                   |
| 7.42E-12 | 4.42E-10 | Selenoamino acid metabolism                                                  |
| 8.05E-12 | 4.45E-10 | Nonsense Mediated Decay (NMD) independent of the Exon Junction Complex (EJC) |
| 1.04E-11 | 5.02E-10 | Nonsense Mediated Decay (NMD) enhanced by the Exon Junction Complex (EJC)    |
| 1.04E-11 | 5.02E-10 | Nonsense-Mediated Decay (NMD)                                                |
| 1.34E-11 | 5.76E-10 | Metabolism of proteins                                                       |
| 1.42E-11 | 5.76E-10 | Cap-dependent Translation Initiation                                         |
| 1.42E-11 | 5.76E-10 | Eukaryotic Translation Initiation                                            |
| 5.51E-10 | 2.13E-08 | Citrate cycle (TCA cycle) (human)                                            |
| 6.59E-09 | 2.43E-07 | Ribosome (human)                                                             |
| 1.50E-08 | 5.27E-07 | Metabolism of amino acids and derivatives                                    |
| 2.57E-08 | 8.66E-07 | Protein processing in endoplasmic reticulum (human)                          |
| 3.69E-08 | 1.18E-06 | Citric acid cycle (TCA cycle)                                                |
| 3.80E-08 | 1.18E-06 | Vesicle-mediated transport                                                   |

|            |            |                                                                                                        |
|------------|------------|--------------------------------------------------------------------------------------------------------|
| 4.72E-08   | 1.41E-06   | Innate Immune System                                                                                   |
| 1.78E-07   | 5.09E-06   | Clathrin-mediated endocytosis                                                                          |
| 6.11E-07   | 1.69E-05   | Pathogenic Escherichia coli infection (human)                                                          |
| 6.63E-07   | 1.77E-05   | Ribosomal scanning and start codon recognition                                                         |
| 7.84E-07   | 2.02E-05   | Translation initiation complex formation                                                               |
| 9.00E-07   | 2.23E-05   | Membrane Trafficking                                                                                   |
| 9.23E-07   | 2.23E-05   | Activation of the mRNA upon binding of the cap-binding complex and eIFs, and subsequent binding to 43S |
| 1.20E-06   | 2.82E-05   | Endocytosis (human)                                                                                    |
| 1.28E-06   | 2.92E-05   | Formation of the ternary complex, and subsequently, the 43S complex                                    |
| 1.61E-06   | 3.56E-05   | Prefoldin mediated transfer of substrate to CCT/TriC                                                   |
| 3.92E-06   | 7.80E-05   | The citric acid (TCA) cycle and respiratory electron transport                                         |
| 4.03E-06   | 7.80E-05   | Beta oxidation of hexanoyl-CoA to butanoyl-CoA                                                         |
| 4.03E-06   | 7.80E-05   | Beta oxidation of lauroyl-CoA to decanoyl-CoA-CoA                                                      |
| 4.03E-06   | 7.80E-05   | Beta oxidation of decanoyl-CoA to octanoyl-CoA-CoA                                                     |
| 4.03E-06   | 7.80E-05   | Beta oxidation of octanoyl-CoA to hexanoyl-CoA                                                         |
| 5.50E-06   | 0.00010136 | mitochondrial fatty acid beta-oxidation of saturated fatty acids                                       |
| 5.50E-06   | 0.00010136 | Folding of actin by CCT/TriC                                                                           |
| 5.96E-06   | 0.00010722 | Cooperation of Prefoldin and TriC/CCT in actin and tubulin folding                                     |
| 6.60E-06   | 0.00011617 | Fatty acid elongation (human)                                                                          |
| 8.80E-06   | 0.00015142 | Formation of tubulin folding intermediates by CCT/TriC                                                 |
| 1.02E-05   | 0.0001715  | Extracellular matrix organization                                                                      |
| 1.66E-05   | 0.00027022 | Glucose metabolism                                                                                     |
| 1.68E-05   | 0.00027022 | Asparagine N-linked glycosylation                                                                      |
| 2.13E-05   | 0.00033641 | Bacterial invasion of epithelial cells (human)                                                         |
| 2.75E-05   | 0.00042587 | Beta oxidation of palmitoyl-CoA to myristoyl-CoA                                                       |
| 3.05E-05   | 0.00046296 | Glycolysis / Gluconeogenesis (human)                                                                   |
| 3.59E-05   | 0.00053508 | Legionellosis (human)                                                                                  |
| 3.85E-05   | 0.00056236 | Glycolysis                                                                                             |
| 4.46E-05   | 0.00062796 | Fatty acid degradation (human)                                                                         |
| 4.46E-05   | 0.00062796 | Proteasome (human)                                                                                     |
| 5.40E-05   | 0.00074572 | ER to Golgi Anterograde Transport                                                                      |
| 5.89E-05   | 0.00079931 | Metabolism of carbohydrates                                                                            |
| 8.42E-05   | 0.00110272 | UCH proteinases                                                                                        |
| 8.55E-05   | 0.00110272 | Valine, leucine and isoleucine degradation (human)                                                     |
| 8.55E-05   | 0.00110272 | Amino sugar and nucleotide sugar metabolism (human)                                                    |
| 9.95E-05   | 0.00126253 | Pyruvate metabolism and Citric Acid (TCA) cycle                                                        |
| 0.00010339 | 0.00129068 | RHO GTPases Activate WASPs and WAVES                                                                   |
| 0.00010924 | 0.00134215 | Immune System                                                                                          |
| 0.0001275  | 0.00154197 | corticosteroids and cardioprotection                                                                   |
| 0.00015817 | 0.00185494 | Recycling pathway of L1                                                                                |

|            |            |                                                                                 |
|------------|------------|---------------------------------------------------------------------------------|
| 0.00015817 | 0.00185494 | Glyoxylate and dicarboxylate metabolism (human)                                 |
| 0.00017315 | 0.00200031 | Tryptophan metabolism (human)                                                   |
| 0.0002466  | 0.00280684 | COPII (Coat Protein 2) Mediated Vesicle Transport                               |
| 0.00033709 | 0.00372721 | VLDLR internalisation and degradation                                           |
| 0.00033709 | 0.00372721 | how does salmonella hijack a cell                                               |
| 0.00034348 | 0.00374441 | Propanoate metabolism (human)                                                   |
| 0.00042561 | 0.00457534 | Mitochondrial Fatty Acid Beta-Oxidation                                         |
| 0.00047532 | 0.00497487 | Advanced glycosylation endproduct receptor signaling                            |
| 0.0004844  | 0.00497487 | Cargo concentration in the ER                                                   |
| 0.00048699 | 0.00497487 | Endocrine and other factor-regulated calcium reabsorption (human)               |
| 0.00048849 | 0.00497487 | Transport to the Golgi and subsequent modification                              |
| 0.00053046 | 0.00533212 | VLDL interactions                                                               |
| 0.00055921 | 0.00554909 | Cardiac muscle contraction (human)                                              |
| 0.0006146  | 0.00602153 | COPI-mediated anterograde transport                                             |
| 0.00064965 | 0.00620772 | Retrograde neurotrophin signalling                                              |
| 0.00064965 | 0.00620772 | Synthesis of bile acids and bile salts via 24-hydroxycholesterol                |
| 0.00066667 | 0.00629275 | Smooth Muscle Contraction                                                       |
| 0.00073106 | 0.00681733 | Shigellosis (human)                                                             |
| 0.0007757  | 0.00713253 | HSF1-dependent transactivation                                                  |
| 0.00078329 | 0.00713253 | Huntington,s disease (human)                                                    |
| 0.00086486 | 0.00756549 | WNT5A-dependent internalization of FZD4                                         |
| 0.00086486 | 0.00756549 | Synthesis of bile acids and bile salts via 27-hydroxycholesterol                |
| 0.00087919 | 0.00756549 | Nef Mediated CD8 Down-regulation                                                |
| 0.00087919 | 0.00756549 | AUF1 (hnRNP D0) binds and destabilizes mRNA                                     |
| 0.00087971 | 0.00756549 | Chaperonin-mediated protein folding                                             |
| 0.00089643 | 0.0076246  | Integrin cell surface interactions                                              |
| 0.00114398 | 0.00962437 | Glutathione metabolism (human)                                                  |
| 0.00119943 | 0.00998236 | Collagen biosynthesis and modifying enzymes                                     |
| 0.00124658 | 0.01024772 | Biological oxidations                                                           |
| 0.0012578  | 0.01024772 | Parkinson,s disease (human)                                                     |
| 0.00130628 | 0.01053187 | Ub-specific processing proteases                                                |
| 0.00136824 | 0.01089577 | Butanoate metabolism (human)                                                    |
| 0.00137957 | 0.01089577 | Protein folding                                                                 |
| 0.00143734 | 0.01112504 | role of pi3k subunit p85 in regulation of actin organization and cell migration |
| 0.00143734 | 0.01112504 | y branching of actin filaments                                                  |
| 0.00154138 | 0.01181219 | Binding and Uptake of Ligands by Scavenger Receptors                            |
| 0.00156154 | 0.0118493  | Post-translational protein modification                                         |
| 0.00161279 | 0.01211944 | Attenuation phase                                                               |
| 0.00174645 | 0.0129976  | EPHB-mediated forward signaling                                                 |
| 0.00188798 | 0.01391712 | Pentose phosphate pathway (human)                                               |
| 0.00193674 | 0.01414186 | Lysine degradation (human)                                                      |



|            |            |                                                                                                                     |
|------------|------------|---------------------------------------------------------------------------------------------------------------------|
| 0.00197156 | 0.01426154 | Cooperation of PDCL (PhLP1) and TRiC/CCT in G-protein beta folding                                                  |
| 0.00201668 | 0.01445287 | Formation of annular gap junctions                                                                                  |
| 0.00205674 | 0.01460473 | Deubiquitination                                                                                                    |
| 0.00209699 | 0.01475517 | Alzheimer,s disease (human)                                                                                         |
| 0.00213672 | 0.01489932 | MHC class II antigen presentation                                                                                   |
| 0.002196   | 0.01504161 | HSF1 activation                                                                                                     |
| 0.002196   | 0.01504161 | beta-Alanine metabolism (human)                                                                                     |
| 0.00235113 | 0.01596292 | Platelet degranulation                                                                                              |
| 0.00241695 | 0.01626711 | EPH-Ephrin signaling                                                                                                |
| 0.00253906 | 0.01694163 | Gluconeogenesis                                                                                                     |
| 0.00268588 | 0.0174695  | Beta oxidation of myristoyl-CoA to lauroyl-CoA                                                                      |
| 0.00268588 | 0.0174695  | Utilization of Ketone Bodies                                                                                        |
| 0.00268588 | 0.0174695  | Formation of the active cofactor, UDP-glucuronate                                                                   |
| 0.00281666 | 0.0178696  | Nef Mediated CD4 Down-regulation                                                                                    |
| 0.00281666 | 0.0178696  | Gap junction degradation                                                                                            |
| 0.00281666 | 0.0178696  | Glycogen synthesis                                                                                                  |
| 0.00313622 | 0.01973526 | Response to elevated platelet cytosolic Ca <sup>2+</sup>                                                            |
| 0.00326232 | 0.02036317 | Cellular response to heat stress                                                                                    |
| 0.00333921 | 0.02067637 | N-glycan trimming in the ER and Calnexin/Calreticulin cycle                                                         |
| 0.00344123 | 0.02113899 | Arginine and proline metabolism (human)                                                                             |
| 0.00378657 | 0.02298271 | The role of GTSE1 in G2/M progression after G2 checkpoint                                                           |
| 0.00380076 | 0.02298271 | Detoxification of Reactive Oxygen Species                                                                           |
| 0.0039203  | 0.02352183 | cystic fibrosis transmembrane conductance regulator (cftr) and beta 2 adrenergic receptor (b2ar) pathway            |
| 0.0041337  | 0.02461138 | TP53 Regulates Metabolic Genes                                                                                      |
| 0.00430626 | 0.02544307 | Starch and sucrose metabolism (human)                                                                               |
| 0.00436584 | 0.0255997  | Lipoprotein metabolism                                                                                              |
| 0.00463396 | 0.0265913  | LDL-mediated lipid transport                                                                                        |
| 0.00463396 | 0.0265913  | Proximal tubule bicarbonate reclamation (human)                                                                     |
| 0.00463802 | 0.0265913  | Respiratory electron transport, ATP synthesis by chemiosmotic coupling, and heat production by uncoupling proteins. |
| 0.0049364  | 0.0274876  | Ethanol oxidation                                                                                                   |
| 0.0049364  | 0.0274876  | Gap junction trafficking                                                                                            |
| 0.0049364  | 0.0274876  | Lysine catabolism                                                                                                   |
| 0.0049364  | 0.0274876  | eNOS activation                                                                                                     |
| 0.0052642  | 0.02859265 | ahr signal transduction pathway                                                                                     |
| 0.0052642  | 0.02859265 | antisense pathway                                                                                                   |
| 0.00541485 | 0.02859265 | Cilium Assembly                                                                                                     |
| 0.00543003 | 0.02859265 | Histidine metabolism (human)                                                                                        |
| 0.00543003 | 0.02859265 | proteasome complex                                                                                                  |
| 0.00543003 | 0.02859265 | Synthesis of bile acids and bile salts via 7alpha-hydroxycholesterol                                                |

|            |            |                                                                            |
|------------|------------|----------------------------------------------------------------------------|
| 0.00543003 | 0.02859265 | Antigen Presentation: Folding, assembly and peptide loading of class I MHC |
| 0.00543622 | 0.02859265 | Phase 1 - Functionalization of compounds                                   |
| 0.00546733 | 0.02859265 | Dilated cardiomyopathy (human)                                             |
| 0.00610838 | 0.03159819 | Pyruvate metabolism (human)                                                |
| 0.00612368 | 0.03159819 | Lipid digestion, mobilization, and transport                               |
| 0.00627473 | 0.03216318 | Dissolution of Fibrin Clot                                                 |
| 0.00649158 | 0.03305582 | Golgi-to-ER retrograde transport                                           |
| 0.00654731 | 0.03312168 | Axon guidance                                                              |
| 0.00681148 | 0.03403649 | Regulation of mRNA stability by proteins that bind AU-rich elements        |
| 0.00681609 | 0.03403649 | Phagosome (human)                                                          |
| 0.00714103 | 0.0354305  | Oxidative phosphorylation (human)                                          |
| 0.00751355 | 0.03704131 | Metabolism of lipids and lipoproteins                                      |
| 0.00756893 | 0.03707818 | Collagen formation                                                         |
| 0.00780884 | 0.03777527 | Gap junction trafficking and regulation                                    |
| 0.00780884 | 0.03777527 | Golgi Cisternae Pericentriolar Stack Reorganization                        |
| 0.00788479 | 0.03790578 | Epstein-Barr virus infection (human)                                       |
| 0.0085921  | 0.04082929 | Leukocyte transendothelial migration (human)                               |
| 0.00859842 | 0.04082929 | Beta oxidation of butanoyl-CoA to acetyl-CoA                               |
| 0.00909221 | 0.04291078 | Amoebiasis (human)                                                         |
| 0.00932813 | 0.04375742 | RHO GTPase Effectors                                                       |
| 0.00959882 | 0.04475592 | Proteoglycans in cancer (human)                                            |
| 0.0101913  | 0.0471206  | Vasopressin-regulated water reabsorption (human)                           |
| 0.01022773 | 0.0471206  | Cargo recognition for clathrin-mediated endocytosis                        |
| 0.01078035 | 0.04937274 | VEGFR2 mediated vascular permeability                                      |
| 0.01115289 | 0.05077843 | Hemostasis                                                                 |
| 0.01148769 | 0.05169461 | Sema3A PAK dependent Axon repulsion                                        |
| 0.01148769 | 0.05169461 | Synthesis of Prostaglandins (PG) and Thromboxanes (TX)                     |
| 0.01212384 | 0.05403948 | Respiratory electron transport                                             |
| 0.01264067 | 0.05570121 | Acyl chain remodeling of CL                                                |
| 0.01274122 | 0.05570121 | Hypertrophic cardiomyopathy (HCM) (human)                                  |
| 0.01274122 | 0.05570121 | COPI-dependent Golgi-to-ER retrograde traffic                              |
| 0.01280984 | 0.05570121 | L1CAM interactions                                                         |
| 0.01337642 | 0.05769615 | ion channels and their functional role in vascular endothelium             |
| 0.01359347 | 0.05769615 | RAB geranylgeranylation                                                    |
| 0.01362284 | 0.05769615 | mcalpain and friends in cell motility                                      |
| 0.01364134 | 0.05769615 | Trafficking of GluR2-containing AMPA receptors                             |
| 0.01364134 | 0.05769615 | Phenylalanine metabolism (human)                                           |
| 0.01515678 | 0.06327758 | Adrenergic signaling in cardiomyocytes (human)                             |
| 0.01520624 | 0.06327758 | Trafficking of AMPA receptors                                              |
| 0.01520624 | 0.06327758 | Glutamate Binding, Activation of AMPA Receptors and Synaptic Plasticity    |
| 0.0158365  | 0.06487314 | Malaria (human)                                                            |

|            |            |                                                                                                |
|------------|------------|------------------------------------------------------------------------------------------------|
| 0.01584036 | 0.06487314 | Degradation of the extracellular matrix                                                        |
| 0.01600875 | 0.06487314 | Deregulated CDK5 triggers multiple neurodegenerative pathways in Alzheimers disease models     |
| 0.01600875 | 0.06487314 | Neurodegenerative Diseases                                                                     |
| 0.01600875 | 0.06487314 | ucalpain and friends in cell spread                                                            |
| 0.01690098 | 0.06813208 | Keratan sulfate/keratin metabolism                                                             |
| 0.01717246 | 0.06864661 | PCP/CE pathway                                                                                 |
| 0.017206   | 0.06864661 | Fatty acid, triacylglycerol, and ketone body metabolism                                        |
| 0.01740974 | 0.06910327 | Muscle contraction                                                                             |
| 0.01815325 | 0.07168681 | Regulation of PLK1 Activity at G2/M Transition                                                 |
| 0.01859199 | 0.07276851 | Prostacyclin signalling through prostacyclin receptor                                          |
| 0.01870922 | 0.07276851 | Synthesis of bile acids and bile salts                                                         |
| 0.01870922 | 0.07276851 | integrin signaling pathway                                                                     |
| 0.02029191 | 0.07813901 | Loss of Nlp from mitotic centrosomes                                                           |
| 0.02029191 | 0.07813901 | Loss of proteins required for interphase microtubule organization from the centrosome          |
| 0.02063289 | 0.07866924 | Tyrosine metabolism (human)                                                                    |
| 0.02063289 | 0.07866924 | Elastic fibre formation                                                                        |
| 0.02106634 | 0.07992817 | Fcgamma receptor (FCGR) dependent phagocytosis                                                 |
| 0.02146977 | 0.08084617 | G2/M Transition                                                                                |
| 0.02159234 | 0.08084617 | Arrhythmogenic right ventricular cardiomyopathy (ARVC) (human)                                 |
| 0.02162165 | 0.08084617 | Cargo trafficking to the periciliary membrane                                                  |
| 0.02196978 | 0.08175295 | Infectious disease                                                                             |
| 0.02266861 | 0.08237326 | Axonal growth inhibition (RHOA activation)                                                     |
| 0.02266861 | 0.08237326 | InIA-mediated entry of Listeria monocytogenes into host cells                                  |
| 0.02266861 | 0.08237326 | Aryl hydrocarbon receptor signalling                                                           |
| 0.02266861 | 0.08237326 | Vitamin C (ascorbate) metabolism                                                               |
| 0.02266861 | 0.08237326 | Regulation of cytoskeletal remodeling and cell spreading by IPP complex components             |
| 0.0233635  | 0.08450164 | Mitotic G2-G2/M phases                                                                         |
| 0.02435961 | 0.08666752 | AURKA Activation by TPX2                                                                       |
| 0.02441023 | 0.08666752 | Scavenging by Class A Receptors                                                                |
| 0.02441023 | 0.08666752 | prion pathway                                                                                  |
| 0.02441023 | 0.08666752 | Hedgehog ligand biogenesis                                                                     |
| 0.02537367 | 0.08967681 | Regulation of actin dynamics for phagocytic cup formation                                      |
| 0.02550697 | 0.08973817 | Platelet activation, signaling and aggregation                                                 |
| 0.02582822 | 0.09045719 | Gastric acid secretion (human)                                                                 |
| 0.02676008 | 0.09329865 | ECM proteoglycans                                                                              |
| 0.0276397  | 0.09510047 | Beta-catenin independent WNT signaling                                                         |
| 0.02764548 | 0.09510047 | Nef-mediates down modulation of cell surface receptors by recruiting them to clathrin adapters |

|            |            |                                                                               |
|------------|------------|-------------------------------------------------------------------------------|
| 0.02764548 | 0.09510047 | Nicotinate metabolism                                                         |
| 0.02856916 | 0.09590874 | Metabolism of ingested SeMet, Sec, MeSec into H2Se                            |
| 0.02856916 | 0.09590874 | Formyl peptide receptors bind formyl peptides and many other ligands          |
| 0.02856916 | 0.09590874 | p75NTR regulates axonogenesis                                                 |
| 0.02856916 | 0.09590874 | Ketone body metabolism                                                        |
| 0.02856916 | 0.09590874 | Pentose phosphate pathway (hexose monophosphate shunt)                        |
| 0.02863135 | 0.09590874 | Golgi Associated Vesicle Biogenesis                                           |
| 0.0287843  | 0.09590874 | Regulation of actin cytoskeleton (human)                                      |
| 0.02893943 | 0.09590874 | Antigen processing and presentation (human)                                   |
| 0.02899566 | 0.09590874 | Cellular responses to stress                                                  |
| 0.02951315 | 0.09720501 | Glutathione conjugation                                                       |
| 0.03058346 | 0.09905038 | Viral myocarditis (human)                                                     |
| 0.03109721 | 0.09905038 | Thromboxane signalling through TP receptor                                    |
| 0.03109721 | 0.09905038 | Biosynthesis of unsaturated fatty acids (human)                               |
| 0.03109721 | 0.09905038 | Post-chaperonin tubulin folding pathway                                       |
| 0.03109721 | 0.09905038 | how progesterone initiates the oocyte maturation                              |
| 0.03109721 | 0.09905038 | BBSome-mediated cargo-targeting to cilium                                     |
| 0.03109721 | 0.09905038 | eNOS activation and regulation                                                |
| 0.03109721 | 0.09905038 | Metabolism of nitric oxide                                                    |
| 0.03203556 | 0.10120621 | Glycine, serine and threonine metabolism (human)                              |
| 0.03203556 | 0.10120621 | Association of TriC/CCT with target proteins during biosynthesis              |
| 0.03476395 | 0.10881784 | ADP signalling through P2Y purinoceptor 1                                     |
| 0.03500729 | 0.10881784 | Synthesis and degradation of ketone bodies (human)                            |
| 0.03500729 | 0.10881784 | Hyaluronan uptake and degradation                                             |
| 0.03500729 | 0.10881784 | regulation of spermatogenesis by crem                                         |
| 0.03587822 | 0.11063642 | Recruitment of mitotic centrosome proteins and complexes                      |
| 0.03587822 | 0.11063642 | Centrosome maturation                                                         |
| 0.03776589 | 0.11599524 | ECM-receptor interaction (human)                                              |
| 0.03864369 | 0.11822221 | Glyoxylate metabolism and glycine degradation                                 |
| 0.03921588 | 0.11950037 | Arachidonic acid metabolism (human)                                           |
| 0.04034005 | 0.12244392 | Bile acid and bile salt metabolism                                            |
| 0.04158312 | 0.12438929 | Mitochondrial protein import                                                  |
| 0.04158312 | 0.12438929 | Synaptic vesicle cycle (human)                                                |
| 0.04194523 | 0.12438929 | Dermatan sulfate biosynthesis                                                 |
| 0.04194523 | 0.12438929 | Nicotinamide salvaging                                                        |
| 0.04194523 | 0.12438929 | role of ran in mitotic spindle regulation                                     |
| 0.04194523 | 0.12438929 | cxcr4 signaling pathway                                                       |
| 0.04335493 | 0.1266291  | Signaling by Retinoic Acid                                                    |
| 0.04335493 | 0.1266291  | Retinoid metabolism and transport                                             |
| 0.04335493 | 0.1266291  | Histidine, lysine, phenylalanine, tyrosine, proline and tryptophan catabolism |
| 0.04335493 | 0.1266291  | Intrinsic Pathway for Apoptosis                                               |

|            |            |                                                                             |
|------------|------------|-----------------------------------------------------------------------------|
| 0.04548464 | 0.13235004 | Phase II conjugation                                                        |
| 0.04934699 | 0.13990685 | Hyaluronan metabolism                                                       |
| 0.04934699 | 0.13990685 | mechanism of protein import into the nucleus                                |
| 0.04934699 | 0.13990685 | Josephin domain DUBs                                                        |
| 0.04934699 | 0.13990685 | Hh mutants that don,t undergo autocatalytic processing are degraded by ERAD |
| 0.04934699 | 0.13990685 | Hh mutants abrogate ligand secretion                                        |
| 0.04934699 | 0.13990685 | g-protein signaling through tubby proteins                                  |
| 0.04934699 | 0.13990685 | Chk1/Chk2(Cds1) mediated inactivation of Cyclin B:Cdk1 complex              |

### Calcific CAVD stage

| p-value  | q-value  | Pathway                                                                 |
|----------|----------|-------------------------------------------------------------------------|
| 1.84E-53 | 8.14E-51 | Complement and coagulation cascades (human)                             |
| 3.91E-34 | 8.66E-32 | Platelet degranulation                                                  |
| 1.85E-33 | 2.74E-31 | Response to elevated platelet cytosolic Ca <sup>2+</sup>                |
| 1.60E-24 | 1.77E-22 | Formation of Fibrin Clot (Clotting Cascade)                             |
| 2.68E-22 | 2.37E-20 | Platelet activation, signaling and aggregation                          |
| 8.53E-22 | 6.29E-20 | Hemostasis                                                              |
| 2.38E-19 | 1.50E-17 | Intrinsic Pathway of Fibrin Clot Formation                              |
| 1.24E-18 | 6.85E-17 | Innate Immune System                                                    |
| 2.07E-18 | 1.02E-16 | Complement cascade                                                      |
| 7.40E-18 | 3.28E-16 | Staphylococcus aureus infection (human)                                 |
| 1.37E-17 | 5.50E-16 | Regulation of Complement cascade                                        |
| 4.42E-17 | 1.63E-15 | intrinsic prothrombin activation pathway                                |
| 6.52E-15 | 2.22E-13 | classical complement pathway                                            |
| 6.11E-14 | 1.93E-12 | Immune System                                                           |
| 7.71E-14 | 2.28E-12 | Scavenging of heme from plasma                                          |
| 3.13E-13 | 8.68E-12 | Neutrophil degranulation                                                |
| 8.46E-13 | 2.08E-11 | Removal of aminoterminal propeptides from gamma-carboxylated proteins   |
| 8.46E-13 | 2.08E-11 | Gamma-carboxylation of protein precursors                               |
| 1.07E-12 | 2.50E-11 | Systemic lupus erythematosus (human)                                    |
| 3.05E-12 | 6.76E-11 | Gamma-carboxylation, transport, and amino-terminal cleavage of proteins |
| 3.67E-12 | 7.74E-11 | Common Pathway of Fibrin Clot Formation                                 |
| 2.30E-11 | 4.63E-10 | extrinsic prothrombin activation pathway                                |
| 1.16E-10 | 2.24E-09 | alternative complement pathway                                          |
| 1.24E-10 | 2.30E-09 | Extracellular matrix organization                                       |
| 2.18E-10 | 3.87E-09 | Regulation of TLR by endogenous ligand                                  |
| 3.29E-10 | 5.60E-09 | Binding and Uptake of Ligands by Scavenger Receptors                    |
| 1.60E-09 | 2.62E-08 | Initial triggering of complement                                        |
| 3.11E-09 | 4.85E-08 | fibrinolysis pathway                                                    |

|            |            |                                                                                                                             |
|------------|------------|-----------------------------------------------------------------------------------------------------------------------------|
| 3.17E-09   | 4.85E-08   | Regulation of Insulin-like Growth Factor (IGF) transport and uptake by Insulin-like Growth Factor Binding Proteins (IGFBPs) |
| 5.10E-09   | 7.54E-08   | Activation of Matrix Metalloproteinases                                                                                     |
| 6.78E-09   | 9.69E-08   | Lipoprotein metabolism                                                                                                      |
| 2.06E-08   | 2.85E-07   | Degradation of the extracellular matrix                                                                                     |
| 2.51E-08   | 3.37E-07   | Pertussis (human)                                                                                                           |
| 2.95E-08   | 3.84E-07   | Lipid digestion, mobilization, and transport                                                                                |
| 4.46E-08   | 5.65E-07   | lectin induced complement pathway                                                                                           |
| 5.65E-08   | 6.95E-07   | Activation of C3 and C5                                                                                                     |
| 3.28E-07   | 3.83E-06   | Terminal pathway of complement                                                                                              |
| 3.28E-07   | 3.83E-06   | Erythrocytes take up oxygen and release carbon dioxide                                                                      |
| 3.62E-07   | 4.01E-06   | p130Cas linkage to MAPK signaling for integrins                                                                             |
| 3.62E-07   | 4.01E-06   | GRB2:SOS provides linkage to MAPK signaling for Integrins                                                                   |
| 6.51E-07   | 7.03E-06   | Metabolism of fat-soluble vitamins                                                                                          |
| 7.07E-07   | 7.46E-06   | Gamma carboxylation, hypusine formation and arylsulfatase activation                                                        |
| 1.64E-06   | 1.69E-05   | HDL-mediated lipid transport                                                                                                |
| 1.87E-06   | 1.88E-05   | Retinoid metabolism and transport                                                                                           |
| 3.14E-06   | 3.03E-05   | Erythrocytes take up carbon dioxide and release oxygen                                                                      |
| 3.14E-06   | 3.03E-05   | O <sub>2</sub> /CO <sub>2</sub> exchange in erythrocytes                                                                    |
| 4.29E-06   | 4.05E-05   | Prion diseases (human)                                                                                                      |
| 7.66E-06   | 7.07E-05   | Platelet Aggregation (Plug Formation)                                                                                       |
| 9.65E-06   | 8.73E-05   | Phagosome (human)                                                                                                           |
| 1.40E-05   | 0.00012393 | Integrin alphaIIb beta3 signaling                                                                                           |
| 1.49E-05   | 0.00012921 | Creation of C4 and C2 activators                                                                                            |
| 2.93E-05   | 0.00024975 | Alternative complement activation                                                                                           |
| 4.67E-05   | 0.00039045 | Integrin cell surface interactions                                                                                          |
| 5.37E-05   | 0.00044072 | Signaling by high-kinase activity BRAF mutants                                                                              |
| 6.30E-05   | 0.00050715 | antigen processing and presentation                                                                                         |
| 7.00E-05   | 0.00055354 | Chylomicron-mediated lipid transport                                                                                        |
| 7.22E-05   | 0.0005591  | Extrinsic Pathway of Fibrin Clot Formation                                                                                  |
| 7.45E-05   | 0.0005591  | Allograft rejection (human)                                                                                                 |
| 7.45E-05   | 0.0005591  | Signaling by RAS mutants                                                                                                    |
| 8.70E-05   | 0.00063173 | Translocation of ZAP-70 to Immunological synapse                                                                            |
| 8.70E-05   | 0.00063173 | Generation of second messenger molecules                                                                                    |
| 8.96E-05   | 0.00063987 | Dissolution of Fibrin Clot                                                                                                  |
| 0.00010113 | 0.00068926 | MAP2K and MAPK activation                                                                                                   |
| 0.00010113 | 0.00068926 | Signaling by moderate kinase activity BRAF mutants                                                                          |
| 0.00010113 | 0.00068926 | Paradoxical activation of RAF signaling by kinase inactive BRAF                                                             |
| 0.00010431 | 0.00070016 | ECM proteoglycans                                                                                                           |
| 0.00012736 | 0.00084207 | Antigen processing and presentation (human)                                                                                 |
| 0.00013081 | 0.00085222 | Viral myocarditis (human)                                                                                                   |

|            |            |                                                                                |
|------------|------------|--------------------------------------------------------------------------------|
| 0.00013489 | 0.00086602 | Graft-versus-host disease (human)                                              |
| 0.00014236 | 0.00088824 | platelet amyloid precursor protein pathway                                     |
| 0.00014236 | 0.00088824 | Metal sequestration by antimicrobial proteins                                  |
| 0.00015747 | 0.00096886 | Phosphorylation of CD3 and TCR zeta chains                                     |
| 0.00016253 | 0.00098634 | MHC class II antigen presentation                                              |
| 0.000177   | 0.00105963 | Type I diabetes mellitus (human)                                               |
| 0.00018866 | 0.00111434 | PD-1 signaling                                                                 |
| 0.00019833 | 0.00115606 | ECM-receptor interaction (human)                                               |
| 0.00023678 | 0.00136227 | Toll-Like Receptors Cascades                                                   |
| 0.00026495 | 0.00150478 | Asthma (human)                                                                 |
| 0.0003234  | 0.0018135  | Classical antibody-mediated complement activation                              |
| 0.00032834 | 0.00181818 | Downstream TCR signaling                                                       |
| 0.00035478 | 0.00194031 | Metabolism of Angiotensinogen to Angiotensins                                  |
| 0.00036684 | 0.00198183 | Cell surface interactions at the vascular wall                                 |
| 0.00038252 | 0.00203809 | Transfer of LPS from LBP carrier to CD14                                       |
| 0.00038715 | 0.00203809 | inhibition of matrix metalloproteinases                                        |
| 0.00039106 | 0.00203809 | TCR signaling                                                                  |
| 0.00048535 | 0.00250013 | African trypanosomiasis (human)                                                |
| 0.00051031 | 0.00259846 | Autoimmune thyroid disease (human)                                             |
| 0.00058343 | 0.00293704 | Hematopoietic cell lineage (human)                                             |
| 0.00087268 | 0.00434377 | Visual phototransduction                                                       |
| 0.0010537  | 0.00518653 | Herpes simplex infection (human)                                               |
| 0.00112329 | 0.00546831 | proteasome complex                                                             |
| 0.00120214 | 0.00578856 | Signaling by BRAF and RAF fusions                                              |
| 0.00127232 | 0.00606063 | Metabolism of vitamins and cofactors                                           |
| 0.00154602 | 0.00728601 | Oncogenic MAPK signaling                                                       |
| 0.00161573 | 0.00753439 | Proteasome (human)                                                             |
| 0.00196805 | 0.00908175 | Focal adhesion (human)                                                         |
| 0.00217612 | 0.00993837 | Intestinal immune network for IgA production (human)                           |
| 0.00223608 | 0.01010799 | Scavenging by Class H Receptors                                                |
| 0.00231755 | 0.01037045 | Metabolism of proteins                                                         |
| 0.00267556 | 0.01185274 | Tuberculosis (human)                                                           |
| 0.00274431 | 0.01203692 | Platelet activation (human)                                                    |
| 0.0028299  | 0.01229065 | Leishmaniasis (human)                                                          |
| 0.00367643 | 0.01537397 | Antimicrobial peptides                                                         |
| 0.00367865 | 0.01537397 | Scavenging by Class B Receptors                                                |
| 0.00367865 | 0.01537397 | VLDL biosynthesis                                                              |
| 0.00367865 | 0.01537397 | Ficolins bind to repetitive carbohydrate structures on the target cell surface |
| 0.00501464 | 0.02076153 | Vesicle-mediated transport                                                     |
| 0.00544679 | 0.02234193 | Lectin pathway of complement activation                                        |
| 0.00882124 | 0.03585145 | Inflammatory bowel disease (IBD) (human)                                       |

|            |            |                                                                                                   |
|------------|------------|---------------------------------------------------------------------------------------------------|
| 0.00932689 | 0.03756195 | Metabolism                                                                                        |
| 0.00985573 | 0.03884032 | Renin-angiotensin system (human)                                                                  |
| 0.00985573 | 0.03884032 | LDL-mediated lipid transport                                                                      |
| 0.00990735 | 0.03884032 | Heme degradation                                                                                  |
| 0.01096446 | 0.042237   | IRS-related events triggered by IGF1R                                                             |
| 0.01096446 | 0.042237   | IGF1R signaling cascade                                                                           |
| 0.01110322 | 0.04240283 | Vitamin digestion and absorption (human)                                                          |
| 0.01127058 | 0.04267408 | Signaling by Type 1 Insulin-like Growth Factor 1 Receptor (IGF1R)                                 |
| 0.01143277 | 0.04292133 | activation of csk by camp-dependent protein kinase inhibits signaling through the t cell receptor |
| 0.01196543 | 0.04454356 | Amoebiasis (human)                                                                                |
| 0.01233344 | 0.04553096 | Non-integrin membrane-ECM interactions                                                            |
| 0.0125745  | 0.04603722 | SHC-related events triggered by IGF1R                                                             |
| 0.01338968 | 0.04861992 | PPAR signaling pathway (human)                                                                    |
| 0.01426807 | 0.05138824 | Peptide hormone metabolism                                                                        |
| 0.01494119 | 0.05337859 | Costimulation by the CD28 family                                                                  |
| 0.01530338 | 0.05361761 | Antigen processing-Cross presentation                                                             |
| 0.01530338 | 0.05361761 | Malaria (human)                                                                                   |
| 0.01537119 | 0.05361761 | corticosteroids and cardioprotection                                                              |
| 0.01551667 | 0.05370224 | Nef mediated downregulation of MHC class I complex cell surface expression                        |
| 0.01572801 | 0.05401171 | HIF-1 signaling pathway (human)                                                                   |
| 0.01662188 | 0.05536461 | RAF/MAP kinase cascade                                                                            |
| 0.01662188 | 0.05536461 | SHC1 events in EGFR signaling                                                                     |
| 0.01662188 | 0.05536461 | SOS-mediated signalling                                                                           |
| 0.01662188 | 0.05536461 | GRB2 events in EGFR signaling                                                                     |
| 0.01711819 | 0.05659222 | Epstein-Barr virus infection (human)                                                              |
| 0.01788655 | 0.05869438 | UCH proteinases                                                                                   |
| 0.01867217 | 0.06010084 | Signalling to p38 via RIT and RIN                                                                 |
| 0.01867217 | 0.06010084 | ARMS-mediated activation                                                                          |
| 0.01872216 | 0.06010084 | Purine catabolism                                                                                 |
| 0.01921226 | 0.06123045 | Frs2-mediated activation                                                                          |
| 0.01950045 | 0.06170499 | MAPK family signaling cascades                                                                    |
| 0.01976361 | 0.06209418 | MAPK1/MAPK3 signaling                                                                             |
| 0.02032633 | 0.06332508 | Prolonged ERK activation events                                                                   |
| 0.02044128 | 0.06332508 | Interaction between L1 and Ankyrins                                                               |
| 0.02090055 | 0.06429822 | Signaling by Leptin                                                                               |
| 0.02148639 | 0.06564462 | Signalling to RAS                                                                                 |
| 0.02208396 | 0.0663889  | Interleukin receptor SHC signaling                                                                |
| 0.02217959 | 0.0663889  | Reversible hydration of carbon dioxide                                                            |
| 0.02217959 | 0.0663889  | g-protein signaling through tubby proteins                                                        |
| 0.02251384 | 0.06693713 | Cell adhesion molecules (CAMs) (human)                                                            |



|            |            |                                                                                            |
|------------|------------|--------------------------------------------------------------------------------------------|
| 0.02340462 | 0.06912164 | Hypertrophic cardiomyopathy (HCM) (human)                                                  |
| 0.02394824 | 0.07025875 | VEGFR2 mediated cell proliferation                                                         |
| 0.02587794 | 0.07177236 | activation of pkc through g-protein coupled receptors                                      |
| 0.02587794 | 0.07177236 | hemoglobins chaperone                                                                      |
| 0.02587794 | 0.07177236 | Endosomal/Vacuolar pathway                                                                 |
| 0.02587794 | 0.07177236 | lck and fyn tyrosine kinases in initiation of tcr activation                               |
| 0.02587794 | 0.07177236 | il-10 anti-inflammatory signaling pathway                                                  |
| 0.02587794 | 0.07177236 | Purine salvage                                                                             |
| 0.02587794 | 0.07177236 | Initiation of Nuclear Envelope Reformation                                                 |
| 0.02587794 | 0.07177236 | Nuclear Envelope Reassembly                                                                |
| 0.0259223  | 0.07177236 | Signalling to ERKs                                                                         |
| 0.02660523 | 0.07320569 | Interleukin-2 signaling                                                                    |
| 0.02800913 | 0.07659286 | RET signaling                                                                              |
| 0.02854051 | 0.07756717 | Toxoplasmosis (human)                                                                      |
| 0.03048351 | 0.08141595 | Rheumatoid arthritis (human)                                                               |
| 0.03048351 | 0.08141595 | Dilated cardiomyopathy (human)                                                             |
| 0.03069179 | 0.08141595 | Purine metabolism                                                                          |
| 0.03069179 | 0.08141595 | Striated Muscle Contraction                                                                |
| 0.03301084 | 0.08578001 | Collagen degradation                                                                       |
| 0.03301084 | 0.08578001 | Smooth Muscle Contraction                                                                  |
| 0.03306897 | 0.08578001 | FCERI mediated MAPK activation                                                             |
| 0.03311147 | 0.08578001 | Host Interactions of HIV factors                                                           |
| 0.03333301 | 0.08585189 | Interleukin-3, 5 and GM-CSF signaling                                                      |
| 0.03395498 | 0.0869483  | il 4 signaling pathway                                                                     |
| 0.03447676 | 0.08777704 | Th1 and Th2 cell differentiation (human)                                                   |
| 0.03541862 | 0.08965972 | Circadian Clock                                                                            |
| 0.03635954 | 0.09151861 | SRP-dependent cotranslational protein targeting to membrane                                |
| 0.03754029 | 0.09395677 | NCAM signaling for neurite out-growth                                                      |
| 0.03831325 | 0.09535263 | the igf-1 receptor and longevity                                                           |
| 0.04287158 | 0.10492879 | Nitrogen metabolism (human)                                                                |
| 0.04287158 | 0.10492879 | Formation of Senescence-Associated Heterochromatin Foci (SAHF)                             |
| 0.04287158 | 0.10492879 | Glycogen breakdown (glycogenolysis)                                                        |
| 0.0456092  | 0.11101579 | Post-translational protein modification                                                    |
| 0.04592443 | 0.11117225 | Fat digestion and absorption (human)                                                       |
| 0.04665138 | 0.11231827 | Metabolism of nucleotides                                                                  |
| 0.04762054 | 0.11341881 | Deregulated CDK5 triggers multiple neurodegenerative pathways in Alzheimers disease models |
| 0.04762054 | 0.11341881 | Neurodegenerative Diseases                                                                 |
| 0.04876566 | 0.11535635 | Porphyrin and chlorophyll metabolism (human)                                               |
| 0.04895484 | 0.11535635 | Proteoglycans in cancer (human)                                                            |

## Supplemental Table 4

### CAVD Leaflet Layer Pathways

#### Diseased (CAVD) Fibrosa

| p-value  | q-value  | Pathway                                                      |
|----------|----------|--------------------------------------------------------------|
| 1.61E-28 | 2.43E-26 | Extracellular matrix organization                            |
| 3.28E-25 | 2.47E-23 | ECM-receptor interaction - Homo sapiens (human)              |
| 1.65E-20 | 8.28E-19 | Complement and coagulation cascades - Homo sapiens (human)   |
| 4.72E-19 | 1.78E-17 | Classical complement pathway                                 |
| 2.28E-16 | 6.87E-15 | ECM proteoglycans                                            |
| 3.67E-15 | 9.23E-14 | Regulation of Complement cascade                             |
| 1.19E-14 | 2.57E-13 | Focal adhesion - Homo sapiens (human)                        |
| 4.11E-14 | 7.76E-13 | Complement cascade                                           |
| 4.78E-14 | 8.01E-13 | Terminal pathway of complement                               |
| 1.60E-13 | 2.35E-12 | Protein digestion and absorption - Homo sapiens (human)      |
| 1.71E-13 | 2.35E-12 | Collagen biosynthesis and modifying enzymes                  |
| 5.81E-13 | 7.32E-12 | Binding and Uptake of Ligands by Scavenger Receptors         |
| 1.98E-12 | 2.30E-11 | Collagen chain trimerization                                 |
| 3.04E-12 | 3.28E-11 | Integrin cell surface interactions                           |
| 6.60E-12 | 6.64E-11 | Collagen formation                                           |
| 3.78E-11 | 3.57E-10 | Alternative complement pathway                               |
| 9.92E-11 | 8.81E-10 | PI3K-Akt signaling pathway - Homo sapiens (human)            |
| 1.64E-10 | 1.38E-09 | Lectin induced complement pathway                            |
| 1.92E-10 | 1.52E-09 | Prion diseases - Homo sapiens (human)                        |
| 5.87E-09 | 4.43E-08 | Platelet degranulation                                       |
| 8.67E-09 | 6.23E-08 | Response to elevated platelet cytosolic Ca <sup>2+</sup>     |
| 9.13E-09 | 6.26E-08 | Scavenging by Class A Receptors                              |
| 5.62E-08 | 3.54E-07 | Amoebiasis - Homo sapiens (human)                            |
| 5.62E-08 | 3.54E-07 | Non-integrin membrane-ECM interactions                       |
| 6.96E-08 | 4.20E-07 | Systemic lupus erythematosus - Homo sapiens (human)          |
| 4.63E-07 | 2.69E-06 | Syndecan interactions                                        |
| 1.13E-06 | 6.34E-06 | Innate Immune System                                         |
| 1.20E-06 | 6.46E-06 | Hemostasis                                                   |
| 1.90E-06 | 9.90E-06 | Pertussis - Homo sapiens (human)                             |
| 1.97E-06 | 9.94E-06 | Assembly of collagen fibrils and other multimeric structures |
| 3.07E-06 | 1.50E-05 | Molecules associated with elastic fibres                     |
| 6.79E-06 | 3.20E-05 | Elastic fibre formation                                      |
| 9.00E-06 | 4.12E-05 | NCAM1 interactions                                           |
| 1.15E-05 | 5.11E-05 | Platelet activation, signaling and aggregation               |
| 2.15E-05 | 9.27E-05 | Retinoid metabolism and transport                            |
| 2.67E-05 | 0.000112 | Intrinsic prothrombin activation pathway                     |

|          |          |                                                                             |
|----------|----------|-----------------------------------------------------------------------------|
| 4.90E-05 | 0.0002   | Metabolism of fat-soluble vitamins                                          |
| 6.43E-05 | 0.000256 | Staphylococcus aureus infection - Homo sapiens (human)                      |
| 9.42E-05 | 0.000356 | Scavenging of heme from plasma                                              |
| 9.42E-05 | 0.000356 | Immune System                                                               |
| 0.000187 | 0.000688 | Proteoglycans in cancer - Homo sapiens (human)                              |
| 0.000284 | 0.001021 | Cell surface interactions at the vascular wall                              |
| 0.000347 | 0.00121  | Glycosaminoglycan metabolism                                                |
| 0.000353 | 0.00121  | Scavenging by Class H Receptors                                             |
| 0.000533 | 0.001789 | Small cell lung cancer - Homo sapiens (human)                               |
| 0.000549 | 0.001801 | Malaria - Homo sapiens (human)                                              |
| 0.000585 | 0.001878 | VLDL biosynthesis                                                           |
| 0.000713 | 0.002242 | Chylomicron-mediated lipid transport                                        |
| 0.000881 | 0.002714 | Pancreatic secretion - Homo sapiens (human)                                 |
| 0.000915 | 0.002764 | Laminin interactions                                                        |
| 0.001029 | 0.003046 | A tetrasaccharide linker sequence is required for GAG synthesis             |
| 0.001107 | 0.003215 | AGE-RAGE signaling pathway in diabetic complications - Homo sapiens (human) |
| 0.001157 | 0.003296 | Visual phototransduction                                                    |
| 0.001194 | 0.00334  | Phagosome - Homo sapiens (human)                                            |
| 0.001282 | 0.003519 | Keratan sulfate biosynthesis                                                |
| 0.001612 | 0.004348 | Cross-presentation of particulate exogenous antigens (phagosomes)           |
| 0.001885 | 0.004993 | Lipoprotein metabolism                                                      |
| 0.002076 | 0.005405 | Keratan sulfate/keratin metabolism                                          |
| 0.002565 | 0.006456 | Gamma-carboxylation of protein precursors                                   |
| 0.002565 | 0.006456 | Removal of aminoterminal propeptides from gamma-carboxylated proteins       |
| 0.00312  | 0.007477 | Dermatan sulfate biosynthesis                                               |
| 0.00312  | 0.007477 | regulators of bone mineralization                                           |
| 0.00312  | 0.007477 | Gamma-carboxylation, transport, and amino-terminal cleavage of proteins     |
| 0.004039 | 0.00953  | Signaling by PDGF                                                           |
| 0.004799 | 0.011148 | Classical antibody-mediated complement activation                           |
| 0.006059 | 0.013862 | Creation of C4 and C2 activators                                            |
| 0.006637 | 0.014958 | Regulation of TLR by endogenous ligand                                      |
| 0.007167 | 0.015915 | Chondroitin sulfate/dermatan sulfate metabolism                             |
| 0.008232 | 0.018015 | Metabolism of vitamins and cofactors                                        |
| 0.008395 | 0.01811  | Heparan sulfate/heparin (HS-GAG) metabolism                                 |
| 0.008617 | 0.018325 | Initial triggering of complement                                            |
| 0.008869 | 0.018601 | NCAM signaling for neurite out-growth                                       |
| 0.009279 | 0.019193 | Ion homeostasis                                                             |
| 0.009503 | 0.019391 | Degradation of the extracellular matrix                                     |
| 0.010214 | 0.020565 | Ion transport by P-type ATPases                                             |
| 0.010446 | 0.020755 | Lipid digestion, mobilization, and transport                                |
| 0.011327 | 0.022212 | Chondroitin sulfate biosynthesis                                            |
| 0.01351  | 0.025823 | VLDL interactions                                                           |

|          |          |                                                                               |
|----------|----------|-------------------------------------------------------------------------------|
| 0.01351  | 0.025823 | Proximal tubule bicarbonate reclamation - Homo sapiens (human)                |
| 0.018272 | 0.03383  | Arrhythmogenic right ventricular cardiomyopathy (ARVC) - Homo sapiens (human) |
| 0.018371 | 0.03383  | Basigin interactions                                                          |
| 0.018371 | 0.03383  | Synthesis of PC                                                               |
| 0.021144 | 0.038467 | Vesicle-mediated transport                                                    |
| 0.02243  | 0.04032  | Amine compound SLC transporters                                               |
| 0.023585 | 0.041899 | Metabolism of carbohydrates                                                   |
| 0.026495 | 0.04652  | Hypertrophic cardiomyopathy (HCM) - Homo sapiens (human)                      |
| 0.028356 | 0.049215 | African trypanosomiasis - Homo sapiens (human)                                |
| 0.028878 | 0.049552 | Developmental Biology                                                         |
| 0.031686 | 0.05376  | Dilated cardiomyopathy - Homo sapiens (human)                                 |
| 0.0326   | 0.054695 | Salivary secretion - Homo sapiens (human)                                     |
| 0.033897 | 0.056247 | Axon guidance                                                                 |
| 0.036535 | 0.057891 | Aldosterone-regulated sodium reabsorption - Homo sapiens (human)              |
| 0.036535 | 0.057891 | Formation of Fibrin Clot (Clotting Cascade)                                   |
| 0.036535 | 0.057891 | Gamma carboxylation, hypusine formation and arylsulfatase activation          |
| 0.036535 | 0.057891 | O-glycosylation of TSR domain-containing proteins                             |
| 0.036805 | 0.057891 | Neutrophil degranulation                                                      |
| 0.040031 | 0.062316 | Fat digestion and absorption - Homo sapiens (human)                           |
| 0.049292 | 0.07595  | Carbohydrate digestion and absorption - Homo sapiens (human)                  |

### Diseased (CAVD) Spongiosa

| p-value  | q-value  | Pathway                                                    |
|----------|----------|------------------------------------------------------------|
| 7.66E-13 | 8.72E-11 | Platelet degranulation                                     |
| 1.24E-12 | 8.72E-11 | Response to elevated platelet cytosolic Ca <sup>2+</sup>   |
| 2.99E-11 | 1.40E-09 | Complement and coagulation cascades - Homo sapiens (human) |
| 4.07E-11 | 1.43E-09 | Hemostasis                                                 |
| 3.71E-10 | 1.05E-08 | Neutrophil degranulation                                   |
| 9.38E-10 | 2.20E-08 | Platelet activation, signaling and aggregation             |
| 2.11E-09 | 4.24E-08 | Innate Immune System                                       |
| 5.58E-08 | 9.83E-07 | Complement cascade                                         |
| 9.88E-08 | 1.55E-06 | Formation of Fibrin Clot (Clotting Cascade)                |
| 1.55E-07 | 2.17E-06 | Intrinsic Pathway of Fibrin Clot Formation                 |
| 1.70E-07 | 2.17E-06 | Initial triggering of complement                           |
| 2.49E-07 | 2.92E-06 | Histidine metabolism - Homo sapiens (human)                |
| 5.43E-07 | 5.89E-06 | Scavenging of heme from plasma                             |
| 7.68E-06 | 7.70E-05 | Common Pathway of Fibrin Clot Formation                    |
| 8.19E-06 | 7.70E-05 | Immune System                                              |
| 1.30E-05 | 0.000115 | Classical antibody-mediated complement activation          |
| 1.39E-05 | 0.000115 | FCGR activation                                            |
| 1.84E-05 | 0.000141 | Metabolism                                                 |

|          |          |                                                                                                          |
|----------|----------|----------------------------------------------------------------------------------------------------------|
| 1.91E-05 | 0.000141 | Creation of C4 and C2 activators                                                                         |
| 3.98E-05 | 0.000281 | Role of phospholipids in phagocytosis                                                                    |
| 5.48E-05 | 0.000368 | Dissolution of Fibrin Clot                                                                               |
| 0.000107 | 0.000688 | Binding and Uptake of Ligands by Scavenger Receptors                                                     |
| 0.00017  | 0.001044 | Regulation of actin dynamics for phagocytic cup formation                                                |
| 0.000197 | 0.001157 | Arginine and proline metabolism - Homo sapiens (human)                                                   |
| 0.000206 | 0.001164 | Alternative complement activation                                                                        |
| 0.000288 | 0.001559 | Glutathione metabolism - Homo sapiens (human)                                                            |
| 0.000325 | 0.001659 | intrinsic prothrombin activation pathway                                                                 |
| 0.000329 | 0.001659 | Fcgamma receptor (FCGR) dependent phagocytosis                                                           |
| 0.000512 | 0.002401 | Metal sequestration by antimicrobial proteins                                                            |
| 0.000528 | 0.002401 | Regulation of Complement cascade                                                                         |
| 0.000528 | 0.002401 | Corticosteroids and cardioprotection                                                                     |
| 0.000714 | 0.003091 | Activation of C3 and C5                                                                                  |
| 0.000724 | 0.003091 | Pentose phosphate pathway - Homo sapiens (human)                                                         |
| 0.000798 | 0.003308 | Beta-Alanine metabolism - Homo sapiens (human)                                                           |
| 0.001142 | 0.0046   | Detoxification of Reactive Oxygen Species                                                                |
| 0.001215 | 0.004628 | Erythrocytes take up oxygen and release carbon dioxide                                                   |
| 0.001215 | 0.004628 | Pentose phosphate pathway (hexose monophosphate shunt)                                                   |
| 0.001495 | 0.005468 | Metabolism of carbohydrates                                                                              |
| 0.001512 | 0.005468 | Hyaluronan uptake and degradation                                                                        |
| 0.001687 | 0.005948 | Tryptophan metabolism - Homo sapiens (human)                                                             |
| 0.002201 | 0.007218 | Ethanol oxidation                                                                                        |
| 0.002201 | 0.007218 | Hyaluronan metabolism                                                                                    |
| 0.002201 | 0.007218 | G-protein signaling through tubby proteins                                                               |
| 0.002591 | 0.007943 | Activation of pkc through g-protein coupled receptors                                                    |
| 0.002591 | 0.007943 | Erythrocytes take up carbon dioxide and release oxygen                                                   |
| 0.002591 | 0.007943 | O <sub>2</sub> /CO <sub>2</sub> exchange in erythrocytes                                                 |
| 0.002689 | 0.008066 | Ion channels and their functional role in vascular endothelium                                           |
| 0.003941 | 0.011577 | Regulation of TLR by endogenous ligand                                                                   |
| 0.004091 | 0.011771 | Lipid digestion, mobilization, and transport                                                             |
| 0.004205 | 0.011859 | Staphylococcus aureus infection - Homo sapiens (human)                                                   |
| 0.00445  | 0.012302 | Glycogen breakdown (glycogenolysis)                                                                      |
| 0.004987 | 0.013521 | Metabolism of Angiotensinogen to Angiotensins                                                            |
| 0.006145 | 0.016046 | HDL-mediated lipid transport                                                                             |
| 0.006145 | 0.016046 | Hormone-sensitive lipase (HSL)-mediated triacylglycerol hydrolysis                                       |
| 0.007299 | 0.018668 | Glycolysis / Gluconeogenesis - Homo sapiens (human)                                                      |
| 0.007414 | 0.018668 | Cystic fibrosis transmembrane conductance regulator (cftr) and beta 2 adrenergic receptor (b2ar) pathway |
| 0.00809  | 0.020011 | Renin-angiotensin system - Homo sapiens (human)                                                          |
| 0.008898 | 0.021632 | PPAR signaling pathway - Homo sapiens (human)                                                            |
| 0.009423 | 0.02252  | Cell surface interactions at the vascular wall                                                           |
| 0.010329 | 0.024272 | Biological oxidations                                                                                    |

|          |          |                                                                                                   |
|----------|----------|---------------------------------------------------------------------------------------------------|
| 0.011053 | 0.025549 | Ascorbate and aldarate metabolism - Homo sapiens (human)                                          |
| 0.012688 | 0.028855 | Peroxisomal lipid metabolism                                                                      |
| 0.014422 | 0.031772 | Activation of camp-dependent protein kinase pka                                                   |
| 0.015325 | 0.033243 | Role of -arrestins in the activation and targeting of map kinases                                 |
| 0.017201 | 0.036749 | African trypanosomiasis - Homo sapiens (human)                                                    |
| 0.019171 | 0.039752 | Roles of arrestin dependent recruitment of src kinases in gpcr signaling                          |
| 0.019171 | 0.039752 | Starch and sucrose metabolism - Homo sapiens (human)                                              |
| 0.02019  | 0.041257 | Steroid hormones                                                                                  |
| 0.022293 | 0.044273 | Pyruvate metabolism - Homo sapiens (human)                                                        |
| 0.022293 | 0.044273 | Glutathione conjugation                                                                           |
| 0.025611 | 0.050154 | Chrebp regulation by carbohydrates and camp                                                       |
| 0.026196 | 0.050483 | Phase 1 - Functionalization of compounds                                                          |
| 0.027088 | 0.050483 | Peptide ligand-binding receptors                                                                  |
| 0.027202 | 0.050483 | Metabolism of lipids and lipoproteins                                                             |
| 0.027927 | 0.050483 | Signaling by Retinoic Acid                                                                        |
| 0.027927 | 0.050483 | Fatty acid degradation - Homo sapiens (human)                                                     |
| 0.027927 | 0.050483 | Histidine, lysine, phenylalanine, tyrosine, proline and tryptophan catabolism                     |
| 0.029115 | 0.051966 | Activation of csk by camp-dependent protein kinase inhibits signaling through the t cell receptor |
| 0.0328   | 0.0564   | Valine, leucine and isoleucine degradation - Homo sapiens (human)                                 |
| 0.0328   | 0.0564   | Peptide hormone metabolism                                                                        |
| 0.0328   | 0.0564   | Amino sugar and nucleotide sugar metabolism - Homo sapiens (human)                                |
| 0.03798  | 0.06452  | Metabolism of fat-soluble vitamins                                                                |
| 0.042056 | 0.070594 | Legionellosis - Homo sapiens (human)                                                              |
| 0.047732 | 0.078259 | Glycerolipid metabolism - Homo sapiens (human)                                                    |
| 0.047732 | 0.078259 | Lysine degradation - Homo sapiens (human)                                                         |

### Diseased (CAVD) Ventricularis

| p-value  | q-value  | Pathway                                                                       |
|----------|----------|-------------------------------------------------------------------------------|
| 7.89E-15 | 2.04E-12 | Smooth Muscle Contraction                                                     |
| 5.69E-12 | 7.37E-10 | Erk and pi-3 kinase are necessary for collagen binding in corneal epithelia   |
| 2.09E-11 | 1.80E-09 | Focal adhesion - Homo sapiens (human)                                         |
| 3.77E-11 | 2.44E-09 | Cell-extracellular matrix interactions                                        |
| 4.38E-10 | 2.27E-08 | Integrin signaling pathway                                                    |
| 5.60E-10 | 2.42E-08 | Regulation of actin cytoskeleton - Homo sapiens (human)                       |
| 7.68E-10 | 2.84E-08 | RHO GTPases activate PAKs                                                     |
| 7.67E-09 | 2.48E-07 | Semaphorin interactions                                                       |
| 6.48E-08 | 1.87E-06 | Laminin interactions                                                          |
| 7.68E-08 | 1.99E-06 | Cell junction organization                                                    |
| 1.73E-07 | 4.08E-06 | Muscle contraction                                                            |
| 2.15E-07 | 4.36E-06 | Cell-Cell communication                                                       |
| 2.19E-07 | 4.36E-06 | Arrhythmogenic right ventricular cardiomyopathy (ARVC) - Homo sapiens (human) |

|          |          |                                                                 |
|----------|----------|-----------------------------------------------------------------|
| 2.82E-07 | 5.22E-06 | RHO GTPases Activate ROCKs                                      |
| 3.83E-07 | 5.91E-06 | Rho cell motility signaling pathway                             |
| 3.88E-07 | 5.91E-06 | Ucalpain and friends in cell spread                             |
| 3.88E-07 | 5.91E-06 | Apoptotic execution phase                                       |
| 5.23E-07 | 7.52E-06 | Citric acid cycle (TCA cycle)                                   |
| 6.65E-07 | 9.06E-06 | Hypertrophic cardiomyopathy (HCM) - Homo sapiens (human)        |
| 1.14E-06 | 1.48E-05 | Dilated cardiomyopathy - Homo sapiens (human)                   |
| 2.63E-06 | 3.16E-05 | Platelet degranulation                                          |
| 2.68E-06 | 3.16E-05 | Localization of the PINCH-ILK-PARVIN complex to focal adhesions |
| 3.43E-06 | 3.62E-05 | Sema4D in semaphorin signaling                                  |
| 3.56E-06 | 3.62E-05 | Response to elevated platelet cytosolic Ca <sup>2+</sup>        |
| 3.91E-06 | 3.62E-05 | Activation of DNA fragmentation factor                          |
| 3.91E-06 | 3.62E-05 | Apoptosis induced DNA fragmentation                             |
| 3.91E-06 | 3.62E-05 | Initiation of Nuclear Envelope Reformation                      |
| 3.91E-06 | 3.62E-05 | Nuclear Envelope Reassembly                                     |
| 5.26E-06 | 4.70E-05 | Axon guidance                                                   |
| 5.45E-06 | 4.70E-05 | mRNA Splicing - Major Pathway                                   |
| 7.93E-06 | 6.62E-05 | mRNA Splicing                                                   |
| 1.22E-05 | 9.37E-05 | Apoptosis                                                       |
| 1.26E-05 | 9.37E-05 | RHO GTPase Effectors                                            |
| 1.27E-05 | 9.37E-05 | Formation of Senescence-Associated Heterochromatin Foci (SAHF)  |
| 1.27E-05 | 9.37E-05 | RHO GTPases activate CIT                                        |
| 1.46E-05 | 0.000105 | Programmed Cell Death                                           |
| 2.48E-05 | 0.000174 | Signaling by Rho GTPases                                        |
| 5.10E-05 | 0.000347 | Non-integrin membrane-ECM interactions                          |
| 5.39E-05 | 0.000358 | Sema4D induced cell migration and growth-cone collapse          |
| 6.43E-05 | 0.000416 | EPH-Ephrin signaling                                            |
| 6.84E-05 | 0.000428 | Processing of Capped Intron-Containing Pre-mRNA                 |
| 6.94E-05 | 0.000428 | Pyruvate metabolism and Citric Acid (TCA) cycle                 |
| 7.66E-05 | 0.000461 | agrin in postsynaptic differentiation                           |
| 0.000101 | 0.000595 | DNA Damage/Telomere Stress Induced Senescence                   |
| 0.000111 | 0.00064  | Salmonella infection - Homo sapiens (human)                     |
| 0.000119 | 0.00067  | SRP-dependent cotranslational protein targeting to membrane     |
| 0.000133 | 0.000735 | Citrate cycle (TCA cycle) - Homo sapiens (human)                |
| 0.000152 | 0.000821 | Ucalpain and friends in cell motility                           |
| 0.00016  | 0.000844 | Translation                                                     |
| 0.000184 | 0.000951 | Spliceosome - Homo sapiens (human)                              |
| 0.000193 | 0.000978 | RHO GTPases activate PKNs                                       |
| 0.00021  | 0.001048 | Tight junction - Homo sapiens (human)                           |
| 0.000216 | 0.001054 | Amoebiasis - Homo sapiens (human)                               |
| 0.00022  | 0.001054 | EPHA-mediated growth cone collapse                              |
| 0.000232 | 0.00109  | Breakdown of the nuclear lamina                                 |
| 0.000275 | 0.001273 | Extracellular matrix organization                               |

|          |          |                                                                                              |
|----------|----------|----------------------------------------------------------------------------------------------|
| 0.000368 | 0.00167  | Eukaryotic Translation Elongation                                                            |
| 0.000433 | 0.001935 | Adherens junction - Homo sapiens (human)                                                     |
| 0.00046  | 0.002021 | Antisense pathway                                                                            |
| 0.000627 | 0.002706 | Bacterial invasion of epithelial cells - Homo sapiens (human)                                |
| 0.000689 | 0.002927 | MET activates PTK2 signaling                                                                 |
| 0.000788 | 0.003292 | ECM-receptor interaction - Homo sapiens (human)                                              |
| 0.000837 | 0.003441 | Developmental Biology                                                                        |
| 0.000906 | 0.003667 | Platelet activation, signaling and aggregation                                               |
| 0.00105  | 0.004139 | Caspase cascade in apoptosis                                                                 |
| 0.001055 | 0.004139 | Nuclear Envelope Breakdown                                                                   |
| 0.001499 | 0.005777 | ECM proteoglycans                                                                            |
| 0.001584 | 0.005777 | AUF1 (hnRNP D0) binds and destabilizes mRNA                                                  |
| 0.001584 | 0.005777 | TFAP2A acts as a transcriptional repressor during retinoic acid induced cell differentiation |
| 0.001584 | 0.005777 | 2-LTR circle formation                                                                       |
| 0.001584 | 0.005777 | Clearance of Nuclear Envelope Membranes from Chromatin                                       |
| 0.001882 | 0.006769 | Glyoxylate and dicarboxylate metabolism - Homo sapiens (human)                               |
| 0.002085 | 0.00725  | MET promotes cell motility                                                                   |
| 0.002092 | 0.00725  | Peptide chain elongation                                                                     |
| 0.002099 | 0.00725  | Regulation of cytoskeletal remodeling and cell spreading by IPP complex components           |
| 0.002278 | 0.00767  | Selenocysteine synthesis                                                                     |
| 0.00228  | 0.00767  | Proteoglycans in cancer - Homo sapiens (human)                                               |
| 0.002375 | 0.007886 | Eukaryotic Translation Termination                                                           |
| 0.002599 | 0.008522 | Shigellosis - Homo sapiens (human)                                                           |
| 0.002684 | 0.008585 | CHL1 interactions                                                                            |
| 0.002685 | 0.008585 | Nonsense Mediated Decay (NMD) independent of the Exon Junction Complex (EJC)                 |
| 0.003335 | 0.010534 | Integration of provirus                                                                      |
| 0.003521 | 0.010987 | Formation of a pool of free 40S subunits                                                     |
| 0.003594 | 0.011082 | Striated Muscle Contraction                                                                  |
| 0.003654 | 0.011134 | Leukocyte transendothelial migration - Homo sapiens (human)                                  |
| 0.003896 | 0.011733 | Rac1 cell motility signaling pathway                                                         |
| 0.003984 | 0.011794 | The citric acid (TCA) cycle and respiratory electron transport                               |
| 0.004053 | 0.011794 | apoptotic dna-fragmentation and tissue homeostasis                                           |
| 0.004053 | 0.011794 | Depolymerisation of the Nuclear Lamina                                                       |
| 0.004374 | 0.012315 | Vascular smooth muscle contraction - Homo sapiens (human)                                    |
| 0.004374 | 0.012315 | Nonsense Mediated Decay (NMD) enhanced by the Exon Junction Complex (EJC)                    |
| 0.004374 | 0.012315 | Nonsense-Mediated Decay (NMD)                                                                |
| 0.00453  | 0.012615 | Platelet activation - Homo sapiens (human)                                                   |
| 0.004649 | 0.012808 | Gene Expression                                                                              |
| 0.004716 | 0.012857 | Axon guidance - Homo sapiens (human)                                                         |
| 0.004892 | 0.013198 | Apoptotic cleavage of cellular proteins                                                      |
| 0.005366 | 0.014039 | GTP hydrolysis and joining of the 60S ribosomal subunit                                      |
| 0.005366 | 0.014039 | L13a-mediated translational silencing of Ceruloplasmin expression                            |



|          |          |                                                                                                        |
|----------|----------|--------------------------------------------------------------------------------------------------------|
| 0.005366 | 0.014039 | 3, -UTR-mediated translational regulation                                                              |
| 0.005682 | 0.01457  | B cell survival pathway                                                                                |
| 0.005682 | 0.01457  | Platelet Adhesion to exposed collagen                                                                  |
| 0.00611  | 0.015514 | Selenoamino acid metabolism                                                                            |
| 0.006923 | 0.017241 | Cap-dependent Translation Initiation                                                                   |
| 0.006923 | 0.017241 | Eukaryotic Translation Initiation                                                                      |
| 0.007561 | 0.018301 | Pten dependent cell cycle arrest and apoptosis                                                         |
| 0.007561 | 0.018301 | SEMA3A-Plexin repulsion signaling by inhibiting Integrin adhesion                                      |
| 0.007561 | 0.018301 | Early Phase of HIV Life Cycle                                                                          |
| 0.008056 | 0.01932  | Hemostasis                                                                                             |
| 0.009681 | 0.023003 | Tnfr1 signaling pathway                                                                                |
| 0.010828 | 0.025266 | Deregulated CDK5 triggers multiple neurodegenerative pathways in Alzheimers disease models             |
| 0.010828 | 0.025266 | Neurodegenerative Diseases                                                                             |
| 0.011469 | 0.026431 | Hiv-1 nef: negative effector of fas and trnf                                                           |
| 0.011532 | 0.026431 | Ribosome - Homo sapiens (human)                                                                        |
| 0.012033 | 0.027338 | Other semaphorin interactions                                                                          |
| 0.012682 | 0.028561 | Pathogenic Escherichia coli infection - Homo sapiens (human)                                           |
| 0.013148 | 0.029357 | L1CAM interactions                                                                                     |
| 0.014608 | 0.03185  | Syndecan interactions                                                                                  |
| 0.014608 | 0.03185  | Prion pathway                                                                                          |
| 0.014634 | 0.03185  | Viral myocarditis - Homo sapiens (human)                                                               |
| 0.01532  | 0.033066 | Formation of the ternary complex, and subsequently, the 43S complex                                    |
| 0.016747 | 0.035847 | Signaling by BRAF and RAF fusions                                                                      |
| 0.017399 | 0.036636 | Nephrin interactions                                                                                   |
| 0.017399 | 0.036636 | Protein export - Homo sapiens (human)                                                                  |
| 0.018246 | 0.038111 | Signaling by MET                                                                                       |
| 0.019023 | 0.039415 | Oncogenic MAPK signaling                                                                               |
| 0.021461 | 0.043767 | Integrin cell surface interactions                                                                     |
| 0.021461 | 0.043767 | Ribosomal scanning and start codon recognition                                                         |
| 0.02231  | 0.045143 | Translation initiation complex formation                                                               |
| 0.023177 | 0.046535 | Activation of the mRNA upon binding of the cap-binding complex and eIFs, and subsequent binding to 43S |
| 0.023592 | 0.047002 | Basigin interactions                                                                                   |
| 0.026979 | 0.05334  | The information processing pathway at the ifn beta enhancer                                            |
| 0.028741 | 0.056394 | Molecules associated with elastic fibres                                                               |
| 0.029756 | 0.057946 | Pertussis - Homo sapiens (human)                                                                       |
| 0.031804 | 0.061472 | Mitotic Anaphase                                                                                       |
| 0.0324   | 0.061539 | Propanoate metabolism - Homo sapiens (human)                                                           |
| 0.0324   | 0.061539 | Signaling by Robo receptor                                                                             |
| 0.032551 | 0.061539 | Mitotic Metaphase and Anaphase                                                                         |
| 0.034295 | 0.064365 | Base excision repair - Homo sapiens (human)                                                            |
| 0.037252 | 0.069413 | Mitotic Prophase                                                                                       |

|          |          |                                                                     |
|----------|----------|---------------------------------------------------------------------|
| 0.03821  | 0.070186 | Elastic fibre formation                                             |
| 0.03821  | 0.070186 | Signaling by high-kinase activity BRAF mutants                      |
| 0.040026 | 0.073006 | Rap1 signaling pathway - Homo sapiens (human)                       |
| 0.04068  | 0.07368  | Small cell lung cancer - Homo sapiens (human)                       |
| 0.042286 | 0.076056 | Signaling by RAS mutants                                            |
| 0.046518 | 0.081406 | Pyruvate metabolism - Homo sapiens (human)                          |
| 0.046518 | 0.081406 | Signaling by moderate kinase activity BRAF mutants                  |
| 0.046518 | 0.081406 | Paradoxical activation of RAF signaling by kinase inactive BRAF     |
| 0.046518 | 0.081406 | MAP2K and MAPK activation                                           |
| 0.048689 | 0.084634 | Regulation of mRNA stability by proteins that bind AU-rich elements |

| Antibody                                        | Supplier                         | Concentration |
|-------------------------------------------------|----------------------------------|---------------|
| Vimentin (mouse)                                | Abcam, UK                        | 1:200         |
| Vimentin (rabbit)                               | Abcam, UK                        | 1:200         |
| AHSG (goat)                                     | R&D Systems, USA                 | 1:100         |
| ALPL (rabbit)                                   | Abcam, UK                        | 1:50          |
| APOB (goat)                                     | Abcam, UK                        | 1:400         |
| AZGP1 (rabbit)                                  | Abcam, UK                        | 1:100         |
| BGN (goat)                                      | R&D Systems, USA                 | 1:100         |
| CATB (rabbit)                                   | Cell Signaling Technologies, USA | 1:100         |
| CD14 (rabbit)                                   | Abcam, UK                        | 1:100         |
| CD9 (mouse)                                     | Biolegend, USA                   | 1:100         |
| CNN1 (rabbit)                                   | Abcam, UK                        | 1:100         |
| COL1A1 (mouse)                                  | Abcam, UK                        | 1:500         |
| CRTAC1(mouse)                                   | R&D Systems, USA                 | 1:100         |
| CSRP1 (rabbit)                                  | Abcam, UK                        | 1:100         |
| DCN (goat)                                      | R&D Systems, USA                 | 1:100         |
| ELN (mouse)                                     | Novus Biologicals, USA           | 1:100         |
| Emilin1 (rabbit)                                | Novus Biologicals, USA           | 1:100         |
| FLNA (rabbit)                                   | Abcam, UK                        | 1:100         |
| FN1 (rabbit)                                    | Abcam, UK                        | 1:400         |
| GFAP (mouse)                                    | EMD Millipore, USA               | 1:100         |
| HP (mouse)                                      | Abcam, UK                        | 1:100         |
| IGF1 (goat)                                     | R&D Systems, USA                 | 1:100         |
| LPA (goat)                                      | Abcam, UK                        | 1:100         |
| LRP1 (mouse)                                    | Invitrogen, USA                  | 1:100         |
| MGP (rabbit)                                    | Abcam, UK                        | 1:50          |
| OGN (goat)                                      | R&D Systems, USA                 | 1:100         |
| PCOLCE2 (rabbit)                                | Thermo Fisher Scientific, USA    | 1:100         |
| PRDX2 (goat)                                    | R&D Systems, USA                 | 1:100         |
| PRELP (mouse)                                   | R&D Systems, USA                 | 1:100         |
| S100A9 (rabbit)                                 | Abcam, UK                        | 1:100         |
| SOD3 (goat)                                     | R&D Systems, USA                 | 1:100         |
| SPARC (goat)                                    | R&D Systems, USA                 | 1:100         |
| SULF1 (rabbit)                                  | Thermo Fisher Scientific, USA    | 1:50          |
| TAGLN2 (rabbit)                                 | Novus Biologicals, USA           | 1:100         |
| TNFRSF11B (goat)                                | R&D Systems, USA                 | 1:100         |
| <b>Supplemental Table 5: Primary antibodies</b> |                                  |               |

|                          |                             |
|--------------------------|-----------------------------|
| Alzheimer disease        | Obesity                     |
| Atherosclerosis          | Osteoporosis                |
| Atrial fibrillation      | Pancreatic cancer           |
| Bladder cancer           | Parkinson's disease         |
| Bronchiolitis obliterans | Peripheral arterial disease |

|                                                                                                                                                                                                                   |                              |
|-------------------------------------------------------------------------------------------------------------------------------------------------------------------------------------------------------------------|------------------------------|
| Calcification diseases (includes vascular calcification, basal ganglia calcification, calcification of the joints and arteries, arterial calcification of infancy, and aortic valve calcification (provides LPA)) | Prostate cancer              |
| Colon cancer                                                                                                                                                                                                      | Pseudoxanthoma elasticum     |
| Crohn disease                                                                                                                                                                                                     | Pulmonary embolism           |
| Dermatomyositis                                                                                                                                                                                                   | Pulmonary fibrosis           |
| Esophageal cancer                                                                                                                                                                                                 | Pulmonary hypertension       |
| Gastric cancer                                                                                                                                                                                                    | Rheumatoid arthritis         |
| Hypercholesterolemia                                                                                                                                                                                              | Scleroderma                  |
| Intracerebral hemorrhage                                                                                                                                                                                          | Sjogren's syndrome           |
| Liver cancer                                                                                                                                                                                                      | Systemic lupus erythematosus |
| Lung cancer                                                                                                                                                                                                       | Takayasu disease             |
| Mixed connective tissue disease                                                                                                                                                                                   | Type I diabetes              |
| Multiple sclerosis                                                                                                                                                                                                | Type II diabetes             |
| Myocardial infarction                                                                                                                                                                                             | Ulcerative colitis           |
| Non-alcoholic fatty liver disease                                                                                                                                                                                 | Vasculitis syndrome          |
| <b>Supplemental Table 6: OMIM and MalaCards database diseases</b>                                                                                                                                                 |                              |

# Supplemental Fig. 1 CAVD Disease Stages Transcriptomics

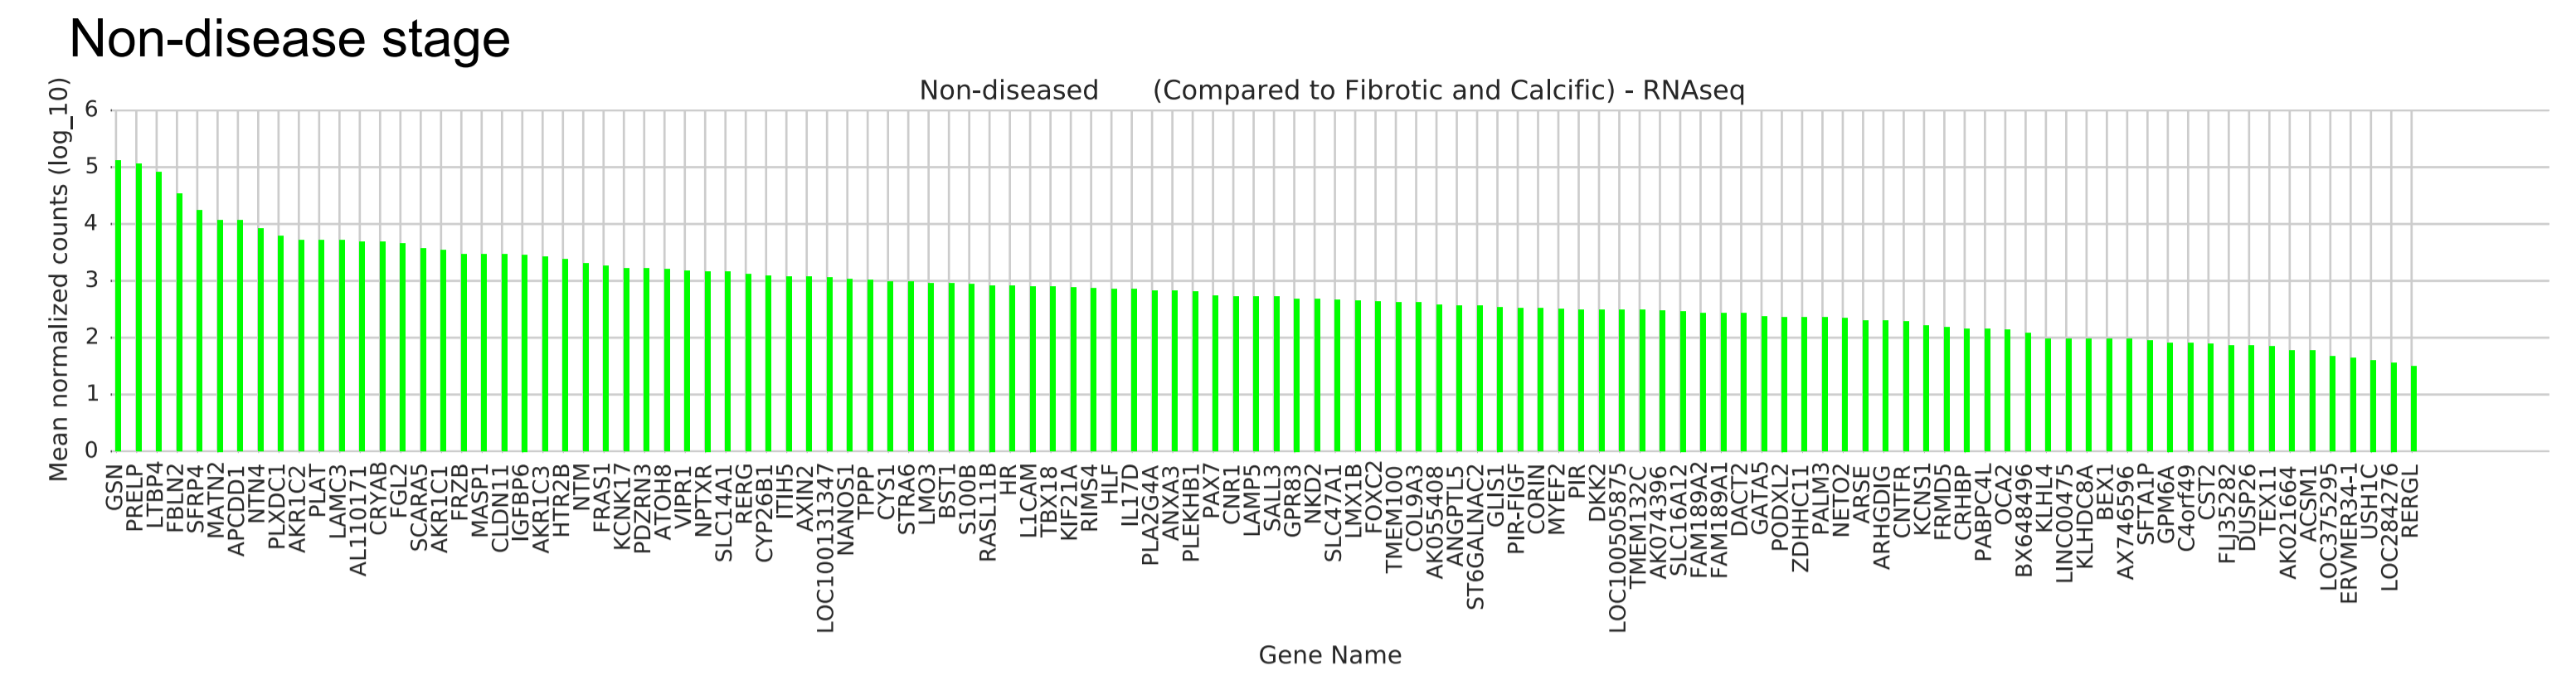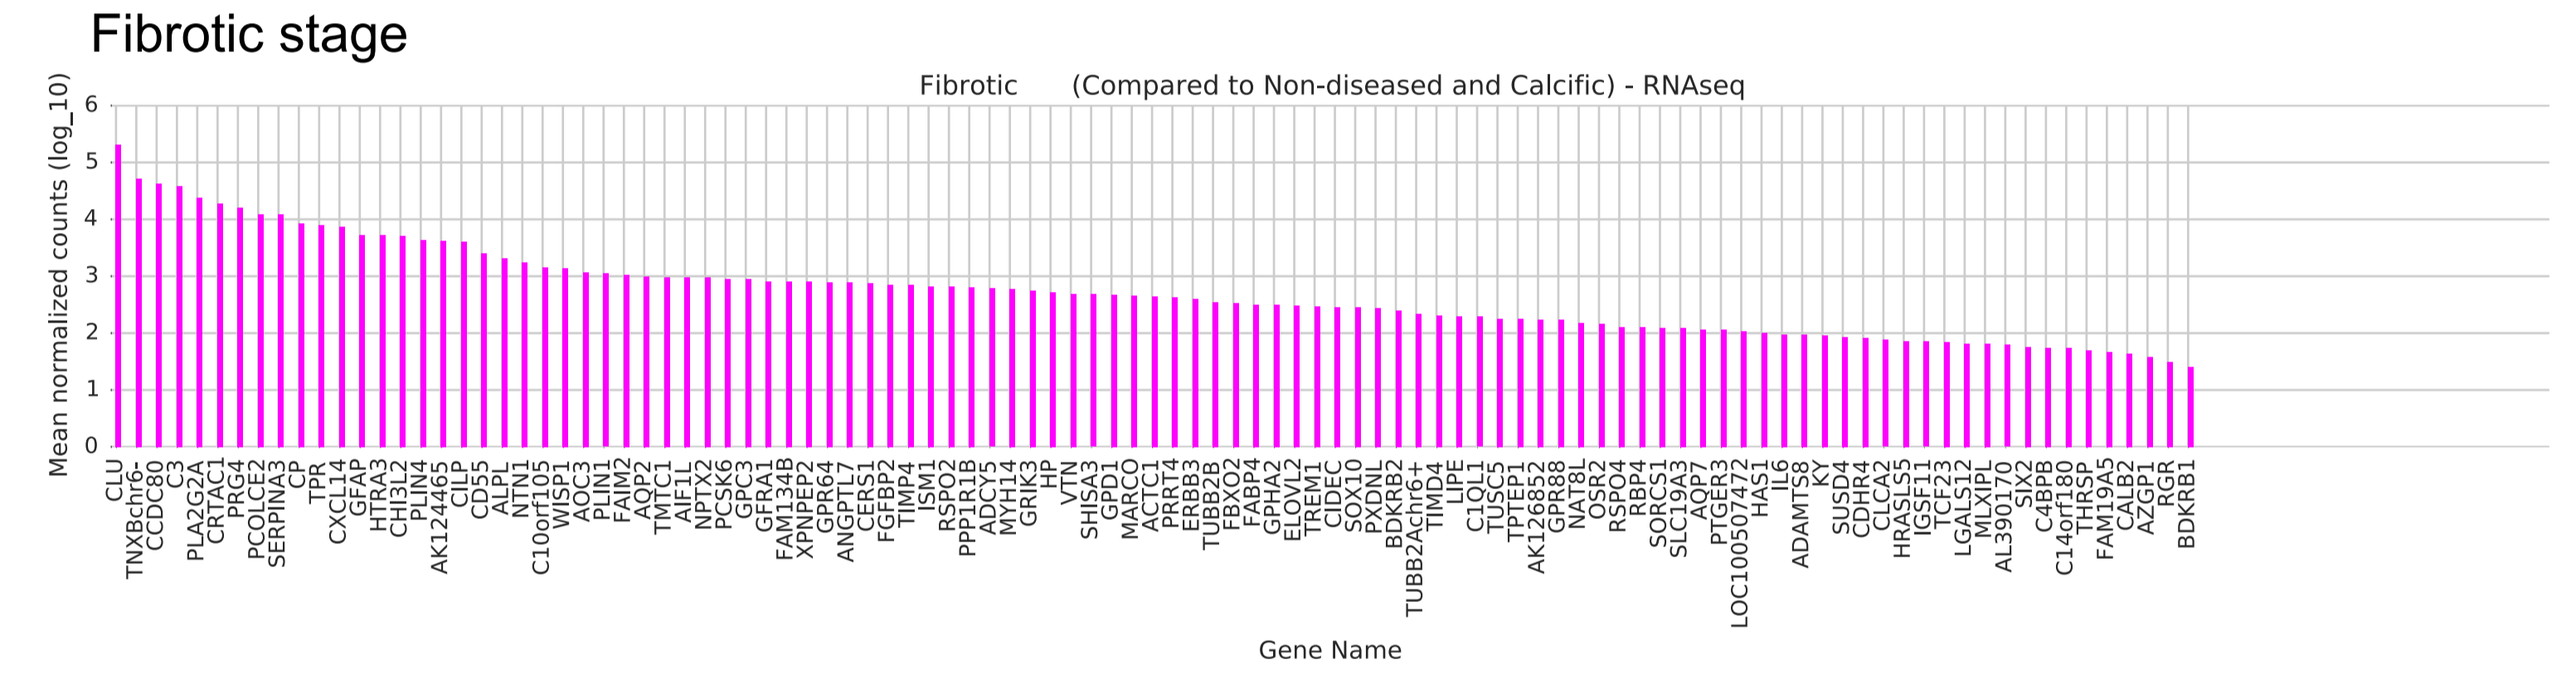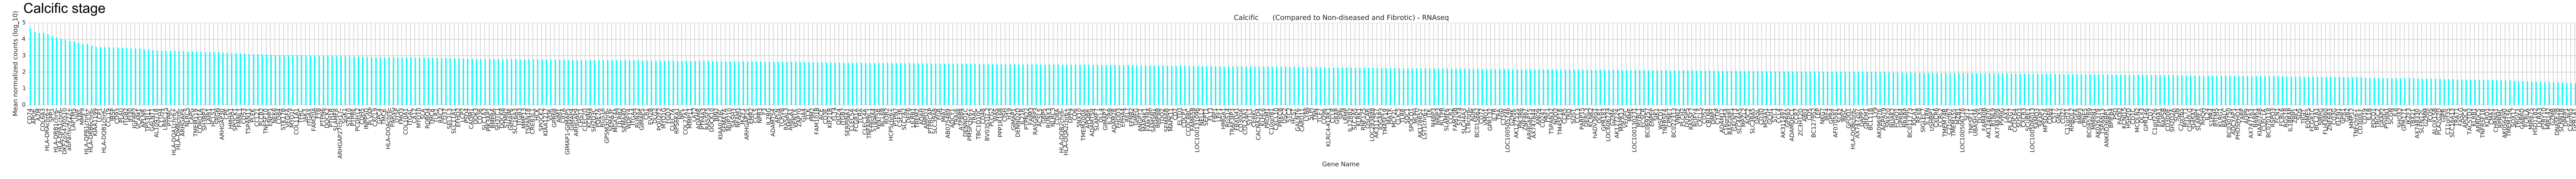

**Supplemental Figure 1: CAVD Disease-associated Stages Transcriptomics (CAVD Disease Stages)**

Disease “stage-specific” RNA ranked according to the logarithm of their normalized mean DESeq2 counts for the three stages from transcriptomics data (n=3 AV donors per group).

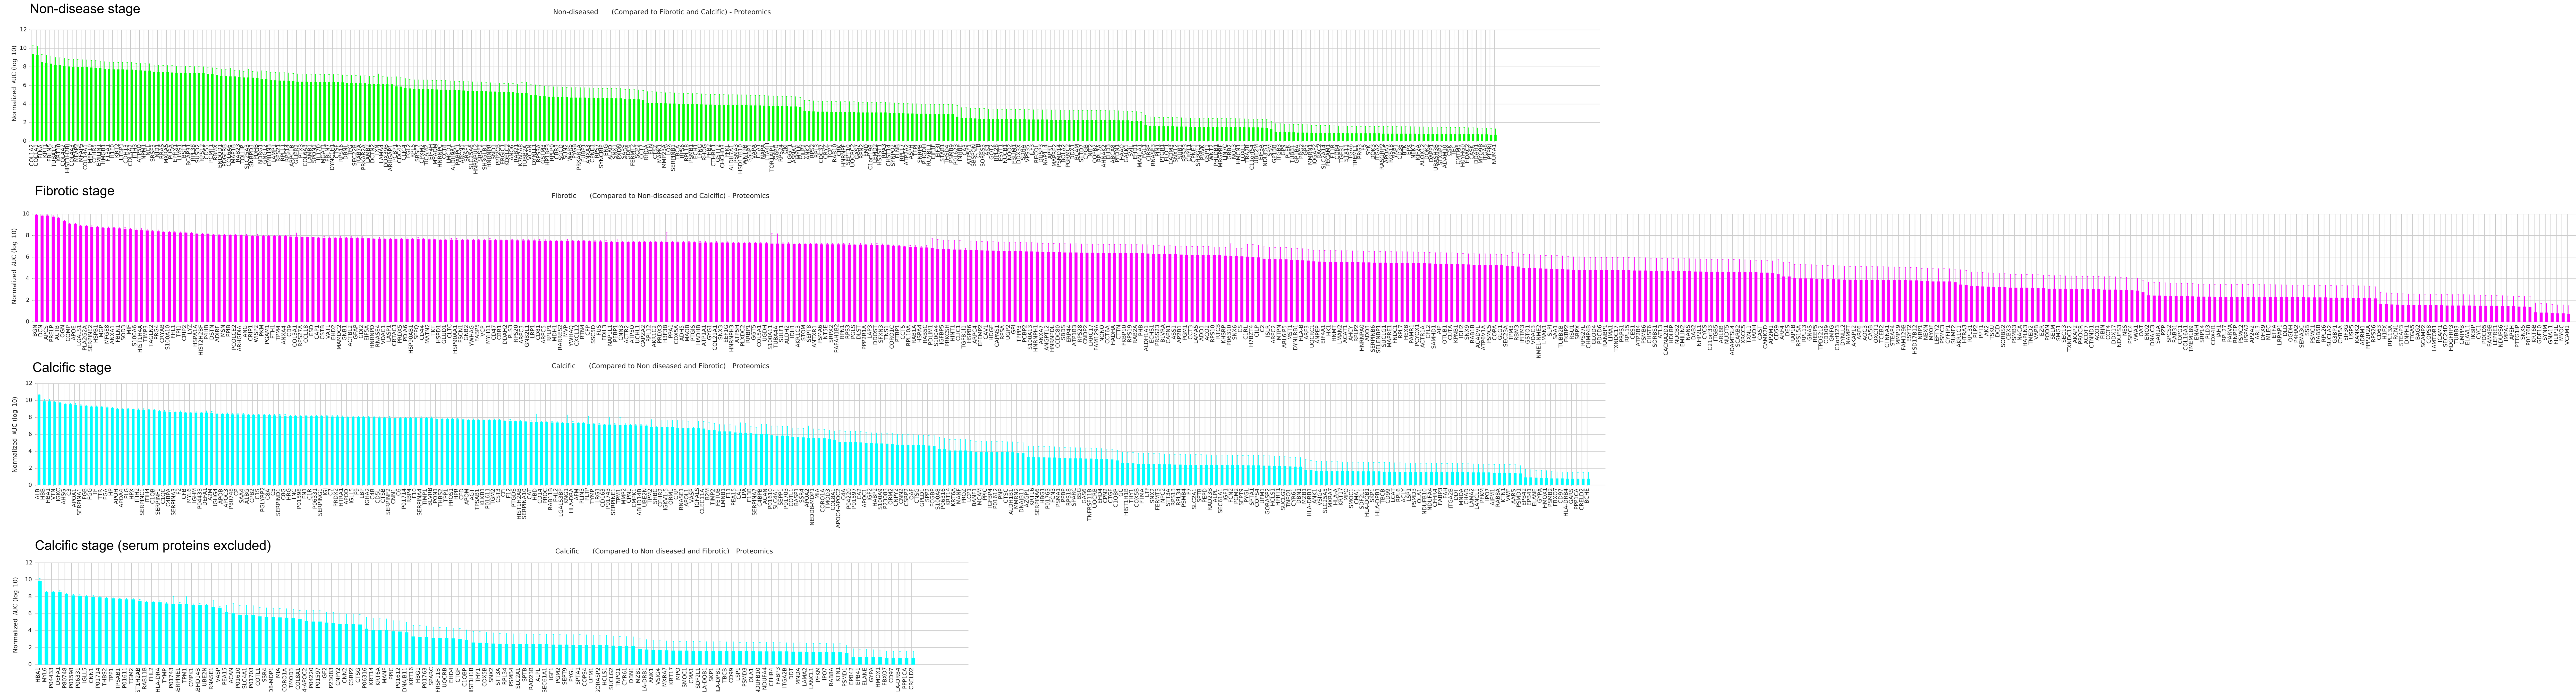

**Supplemental Figure 2: CAVD Disease-associated Stages Proteomics (CAVD Disease Stages)**

Disease “stage-specific” proteins ranked according to the logarithm of their normalized mean AUCs for the three stages from the proteomics data (n=9 AV donors per group). Lower panel: Calcific stage proteome with plasma proteins excluded.



Supplemental Fig. 3

a

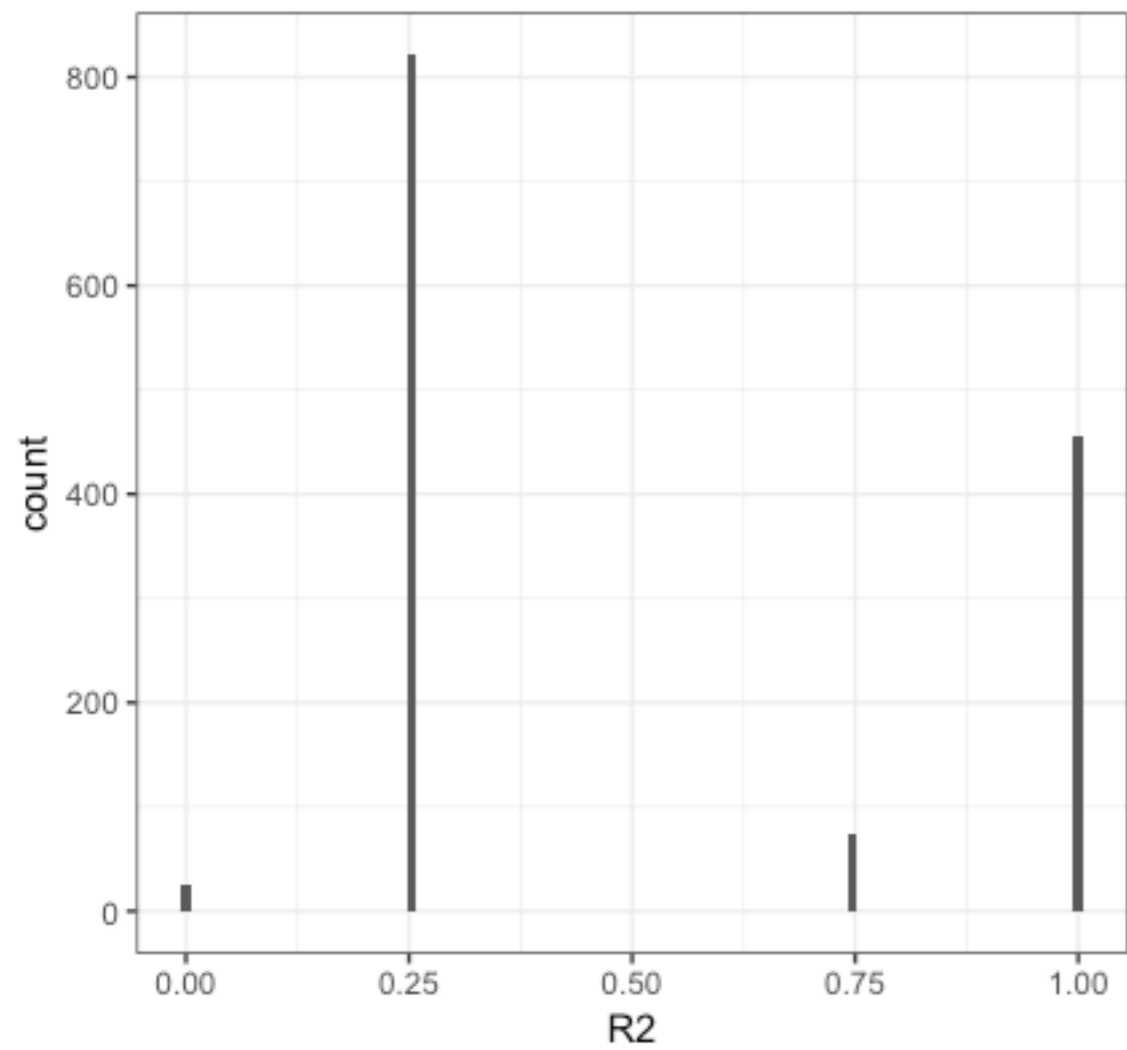

b

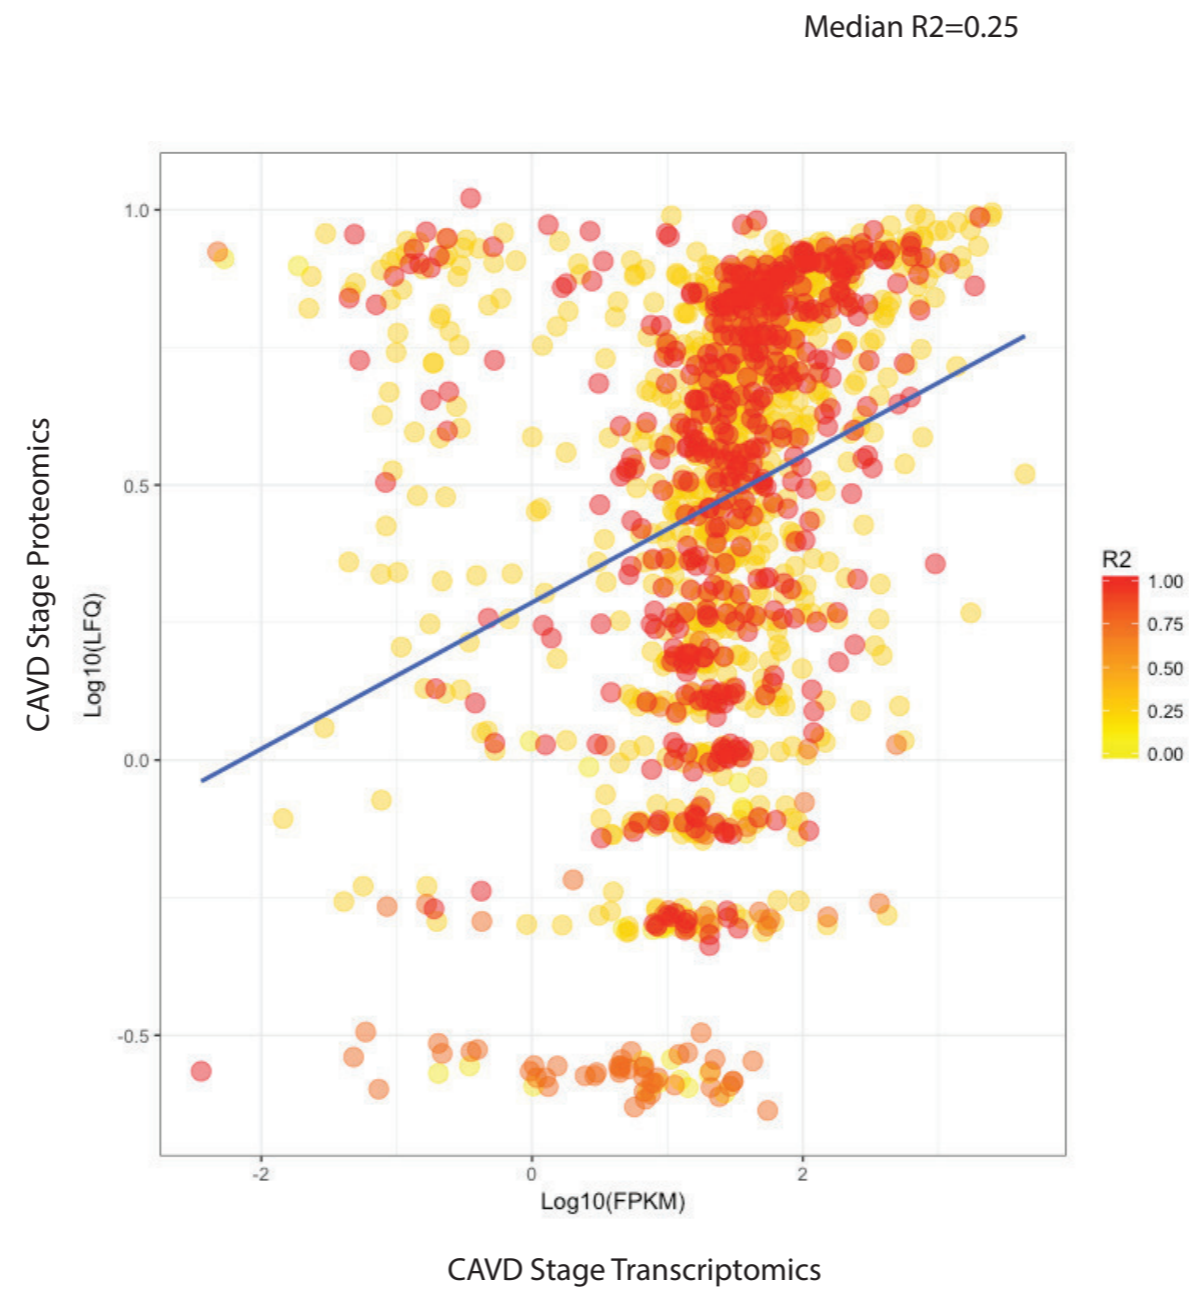

c

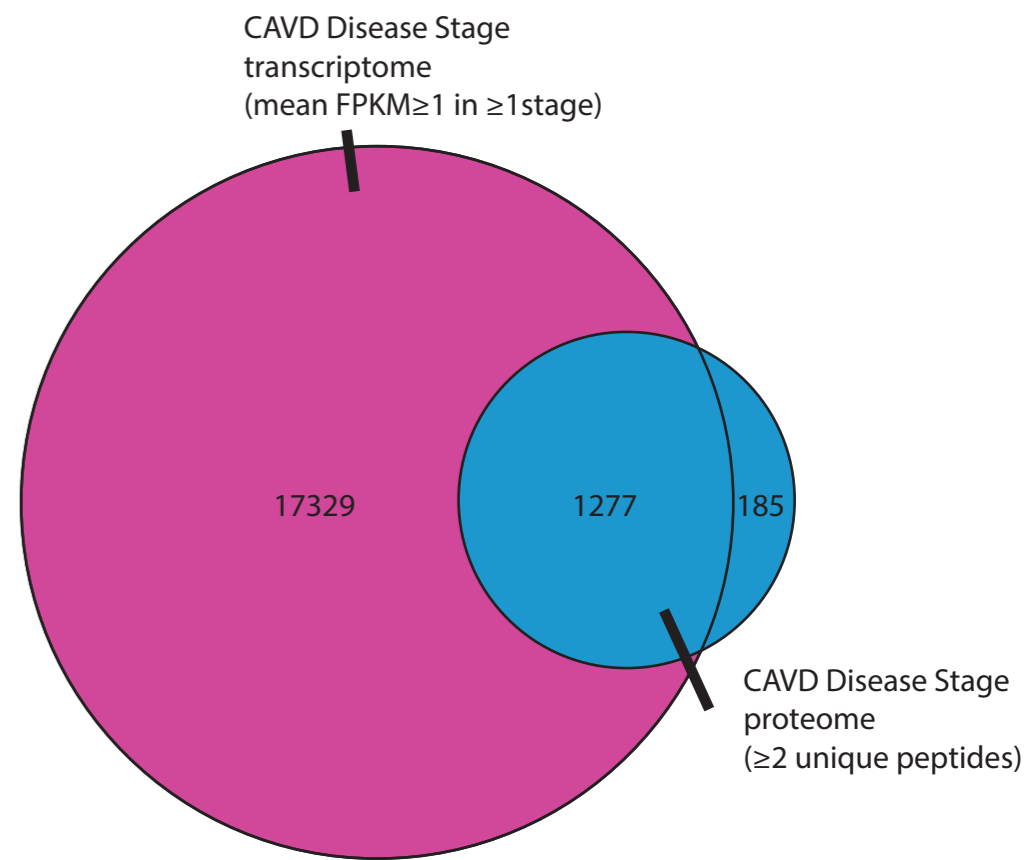

### **Supplemental Figure 3: Correlation Analyses CAVD Stage Transcriptomics and CAVD Stage Proteomics**

**a./b.** FPKM of transcriptomics and median-normalized AUC of label free proteomics (LFQ) were compared using squared absolute values of Spearman correlation coefficient. The LFQ and transcriptomics samples were not from the same donor, and the FPKM and the normalized AUC in the three stages were averaged (non-diseased, fibrotic and calcific stages). We used an in-house R script using ggplot2 to draw a histogram and a density scatter plot.

**c.** Venn diagram of the overlap between CAVD disease stage transcriptomics (FPKM  $\geq 1$  in at least one stage), CAVD disease stage proteomics ( $\geq 2$  unique peptides)

# Supplemental Fig. 4

## a Layer histopathology

Non-diseased

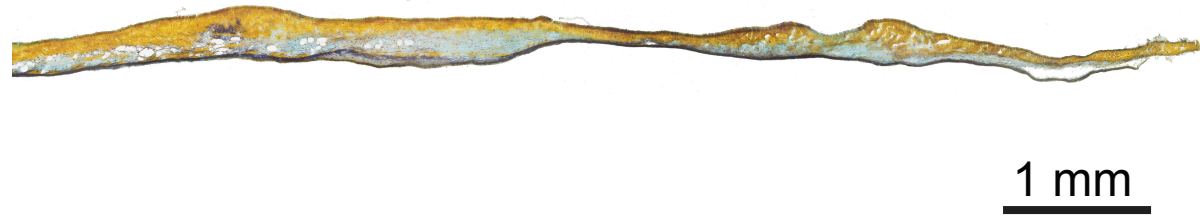

CAVD

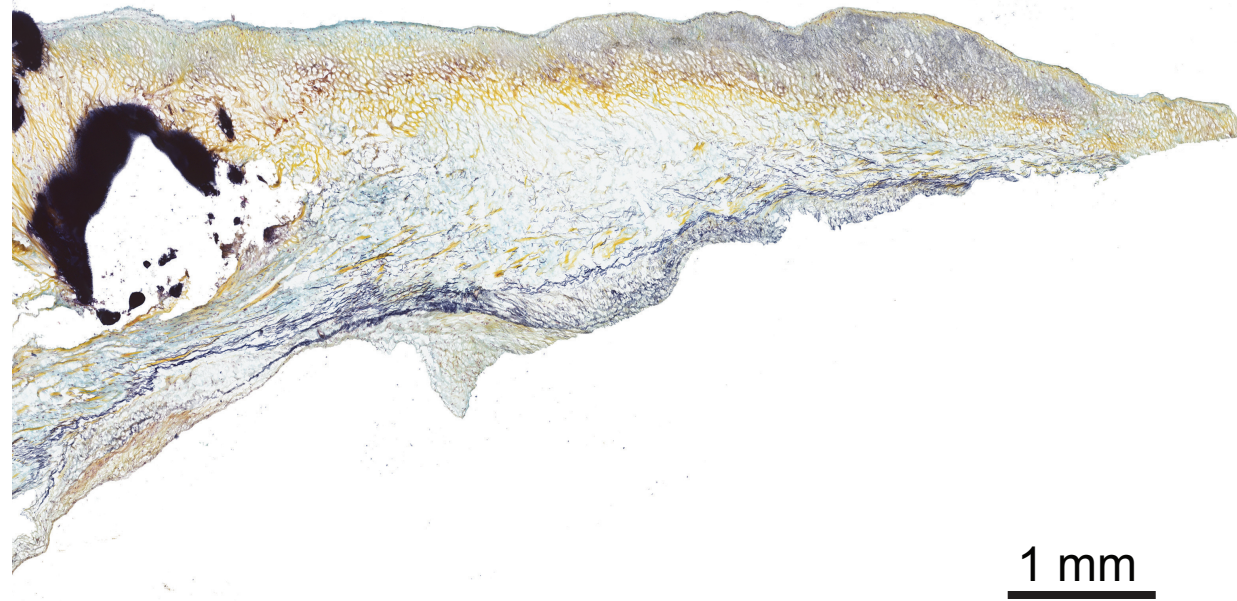

## b Layer schematic

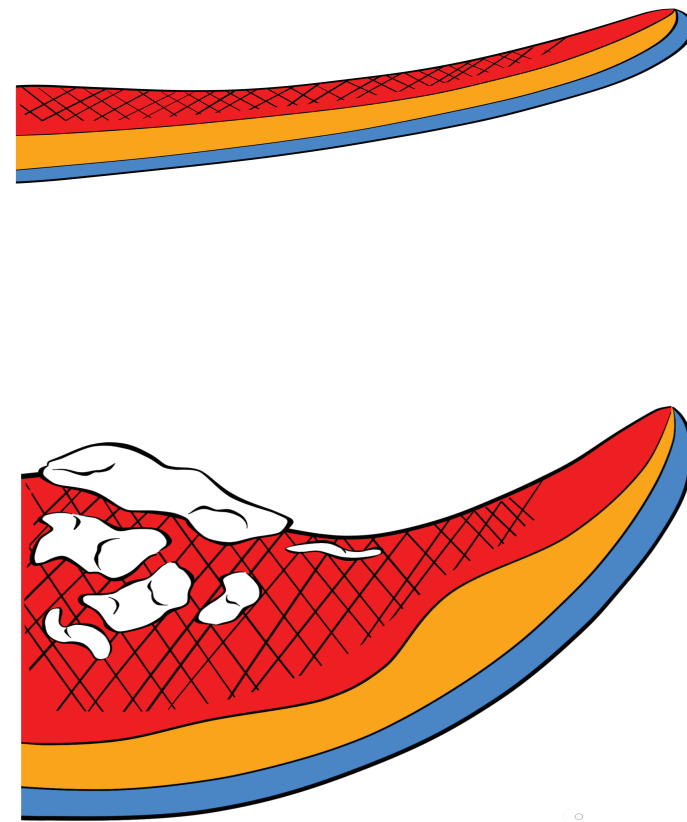

## c Aortic valve layers

Fibrosa

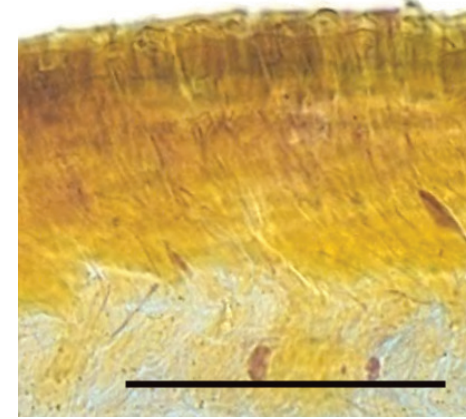

Spongiosa

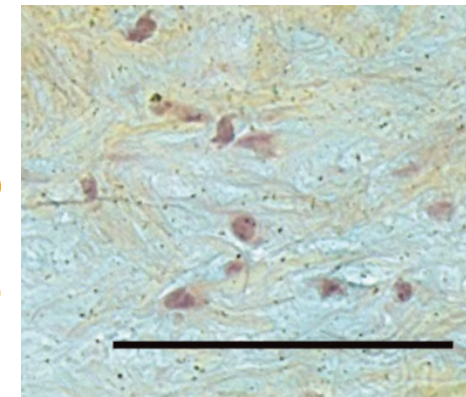

Ventricularis

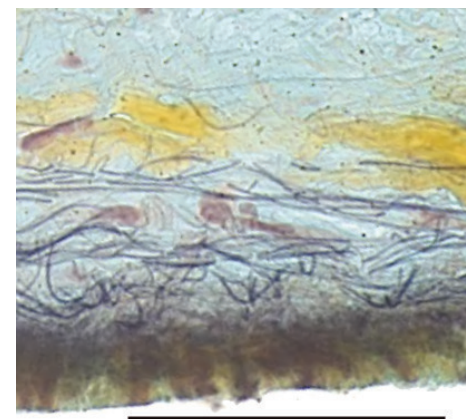

## d Aortic valve laser capture microdissection

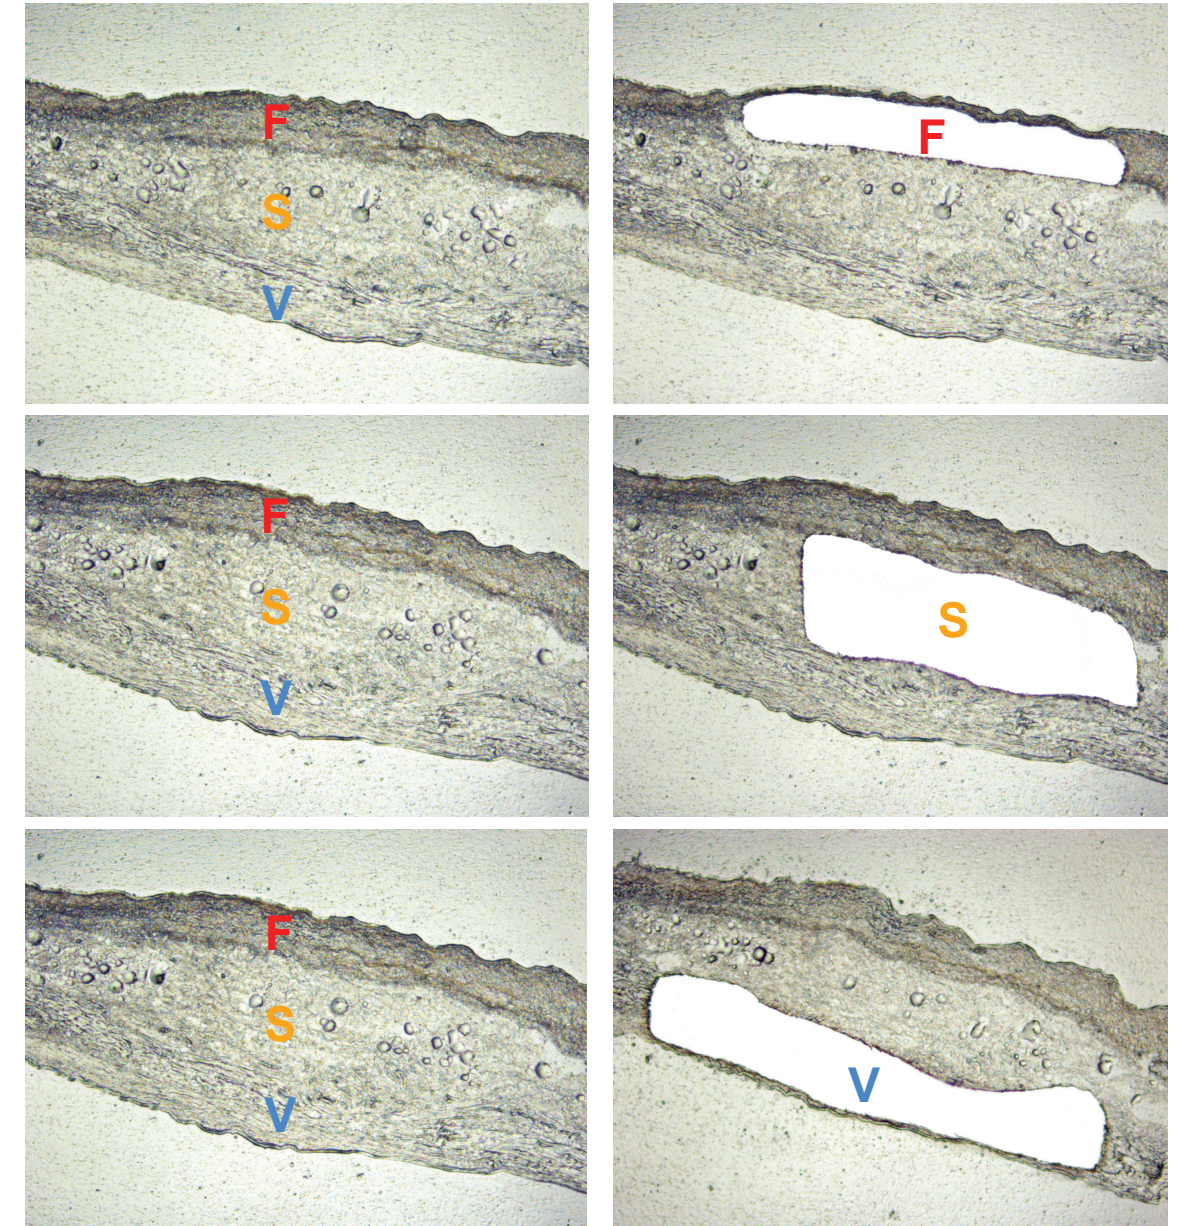

#### **Supplemental Figure 4: CAVD Layers Overview and Methodology**

- a.** Layer histopathology of non-diseased and CAVD human AV samples (Movat pentachrome staining).
- b.** Schematic of the AV layer anatomy in non-diseased and CAVD (red – fibrosa, yellow – spongiosa, blue – ventricularis).
- c.** Movat pentachrome staining (collagen - yellow, proteoglycans/glycosaminoglycans - blue, elastin - black) of non-diseased human AV samples. Scale bar = 100 $\mu$ m.
- d.** Layer-specific laser capture microdissection of the fibrosa, spongiosa and ventricularis.

# Supplemental Fig. 5

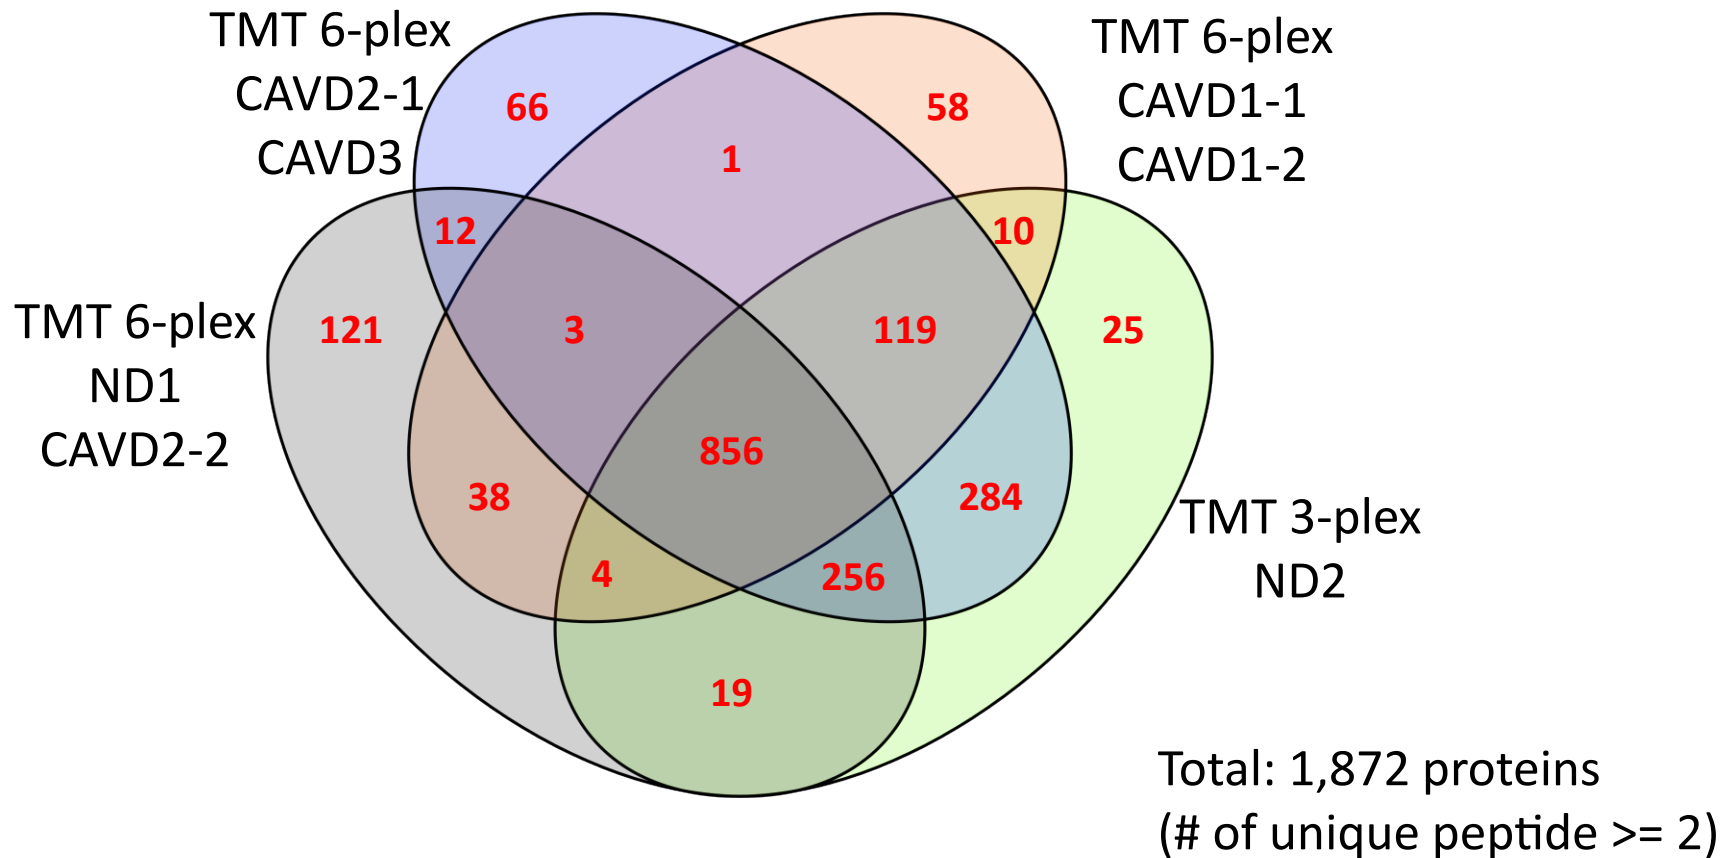

**Supplemental Figure 5: Venn diagram of the proteins retrieved from the individual TMT experiments of the leaflet layer proteomics**

ND1/2: control samples from autopsy, CAVD 1-3: CAVD samples, CAVD1 and 2 were analyzed in duplicates

# Supplemental Fig. 6

## Combined Leaflet Layer Proteomics

### Fibrosa layer

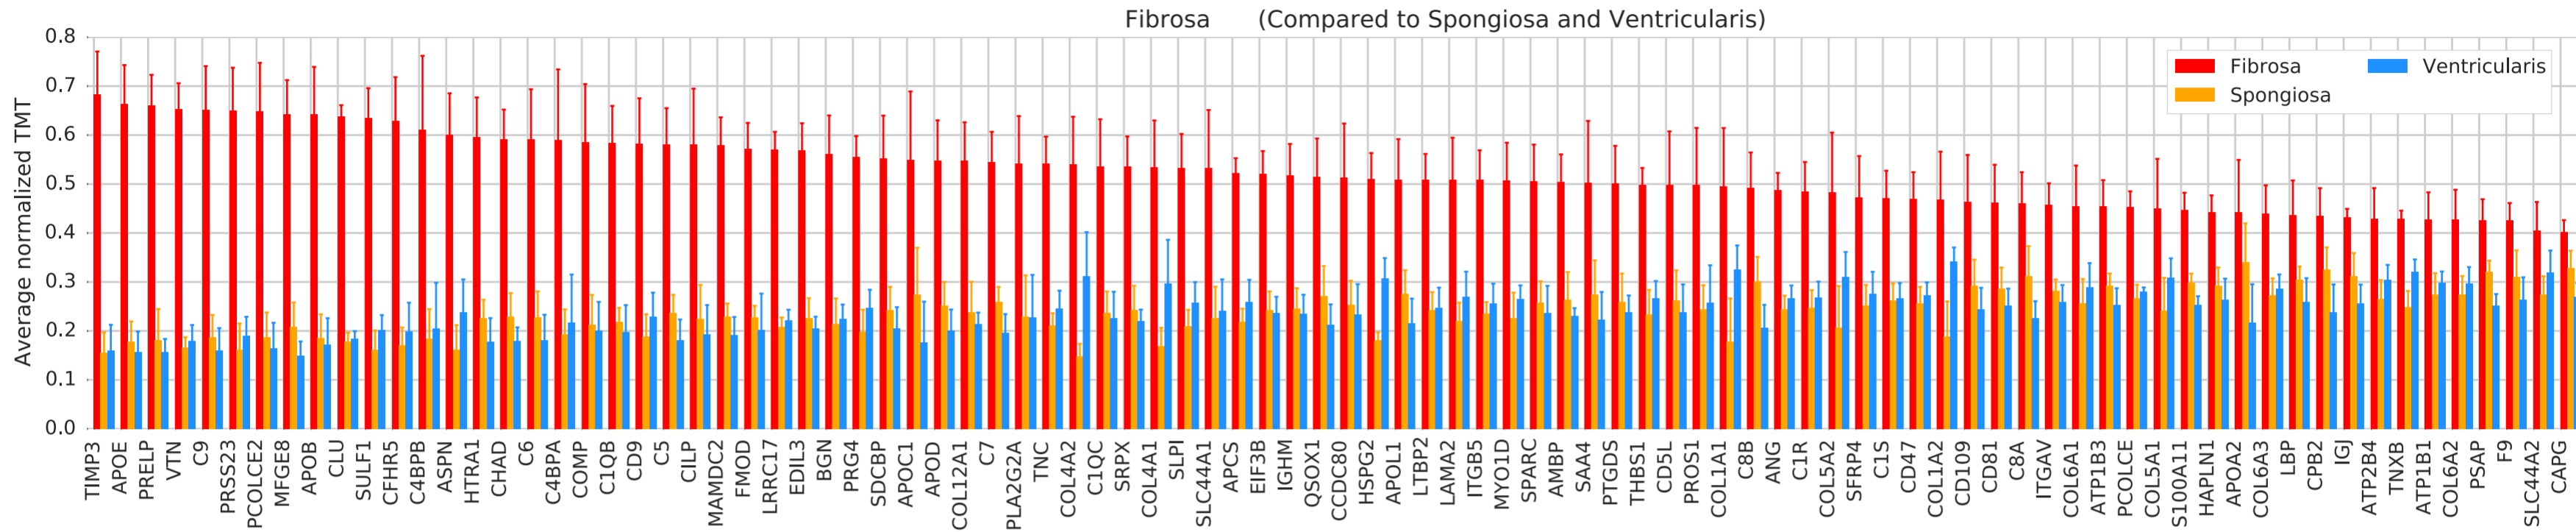

### Spongiosa layer

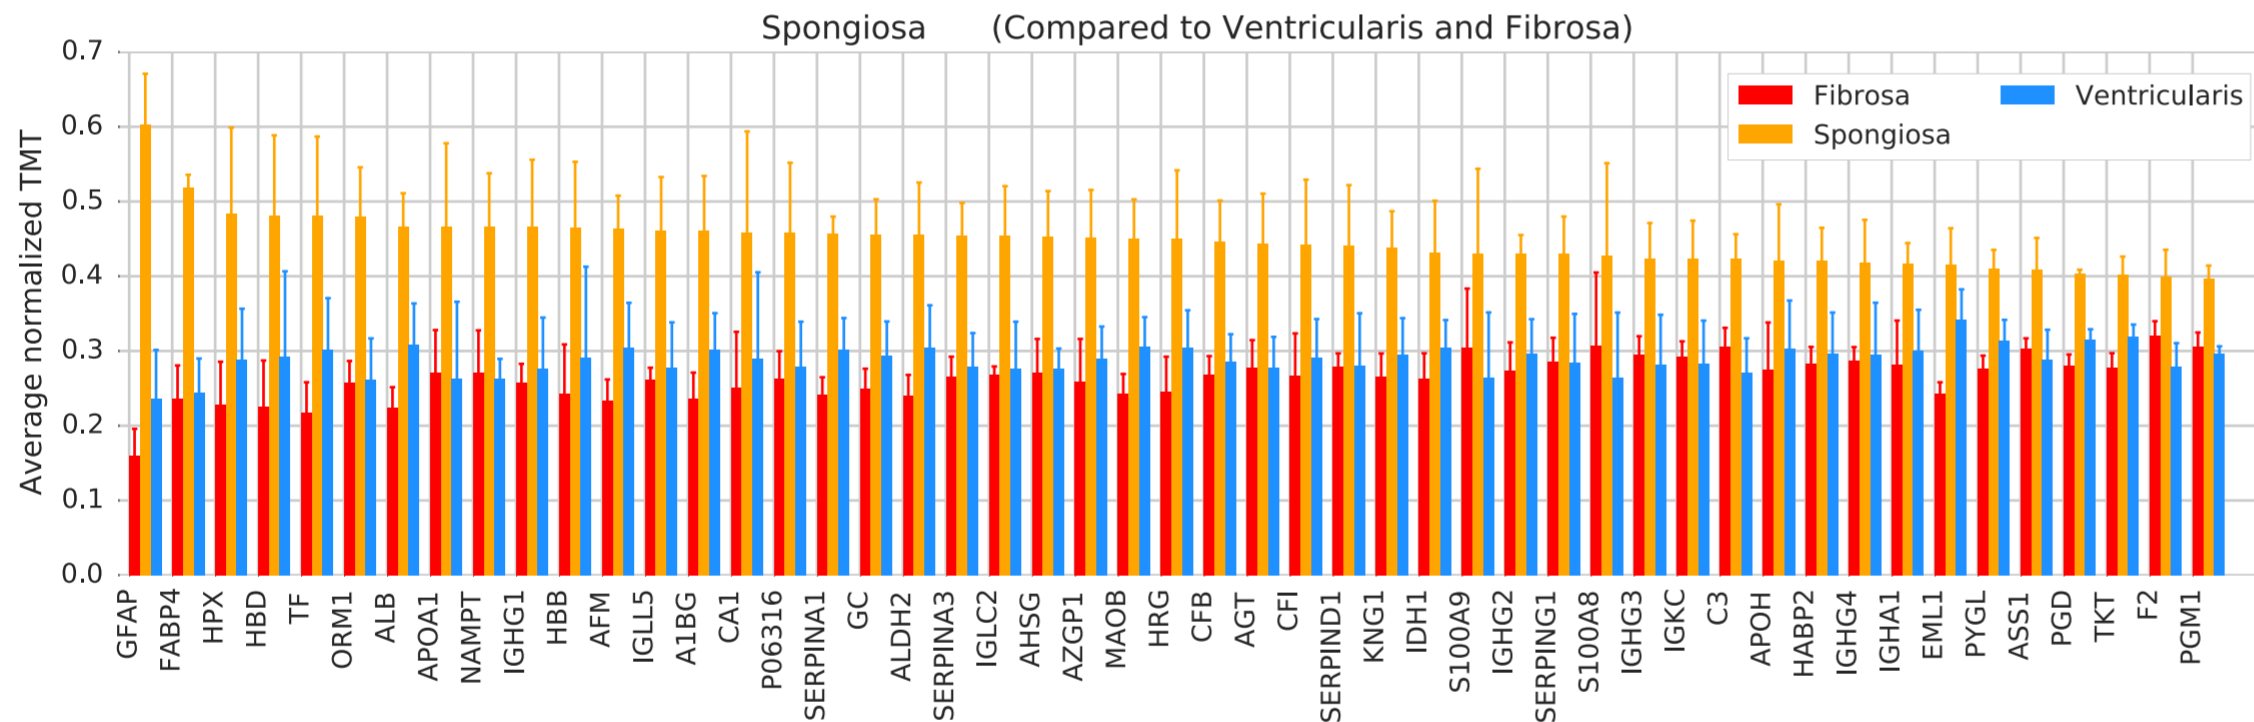

### Ventricularis layer

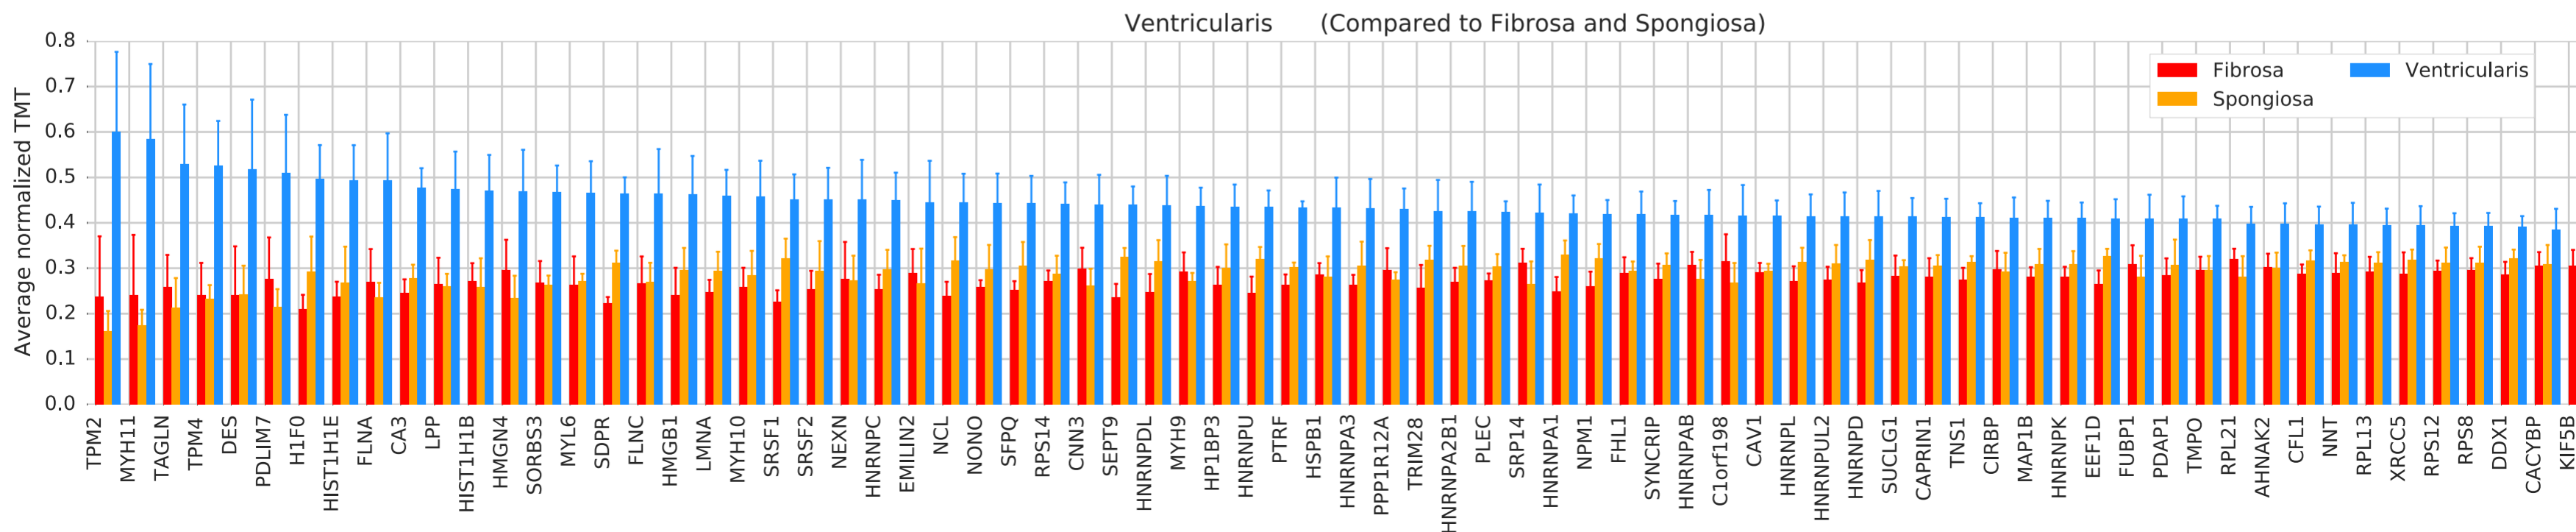

### **Supplemental Figure 6: Leaflet Layer 'All' Donors Proteomics (CAVD Layers)**

CAVD AV "Layer-specific" proteins ranked according to their average normalized TMT in all three layers as a consistent signal regardless of the disease state (n=5). Error bars indicate standard deviation (SD).



Fibrosa layer

Fibrosa (Compared to Spongiosa and Ventricularis) -- Non-diseased

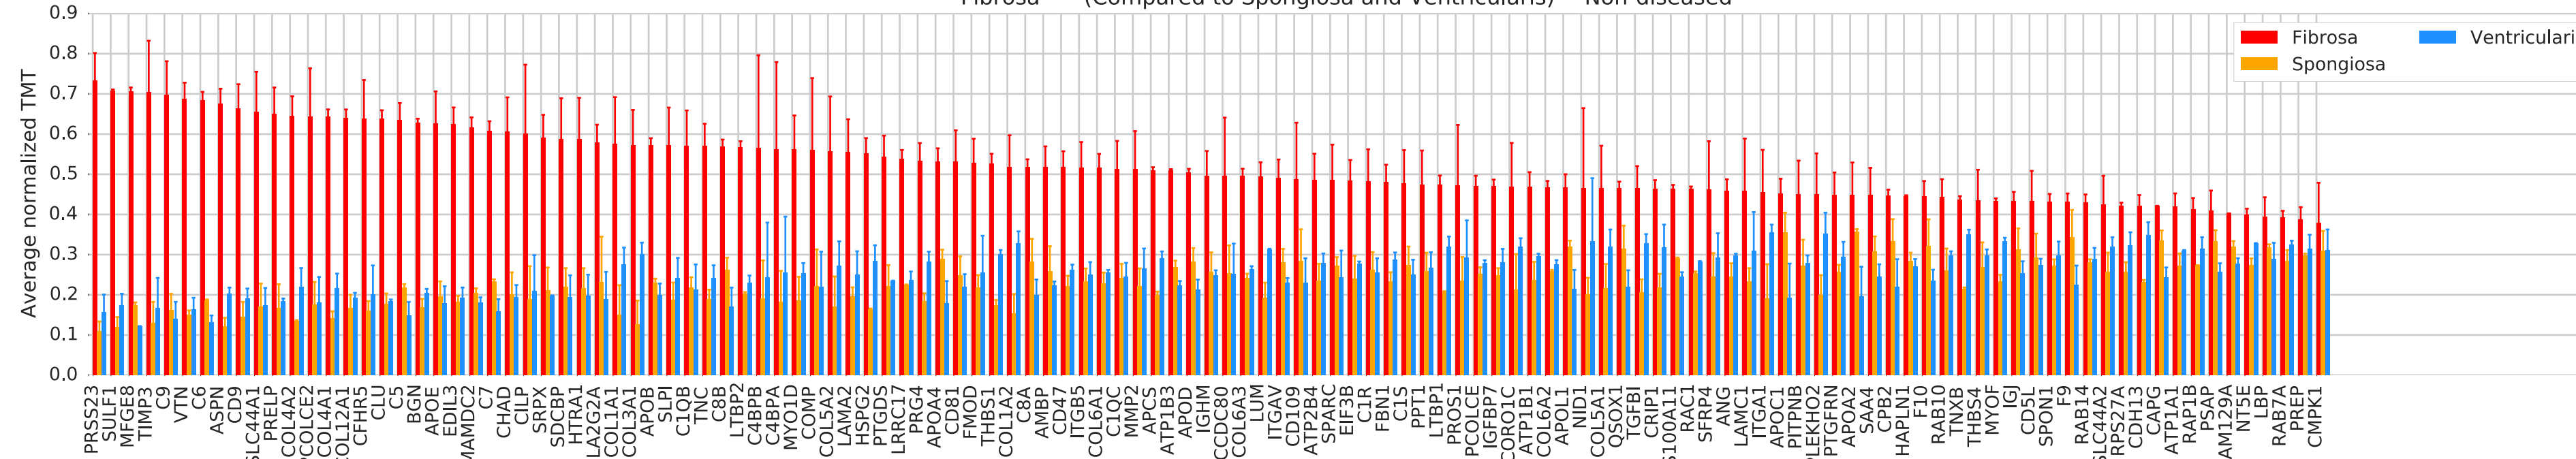

Spongiosa layer

Spongiosa (Compared to Ventricularis and Fibrosa) -- Non-diseased

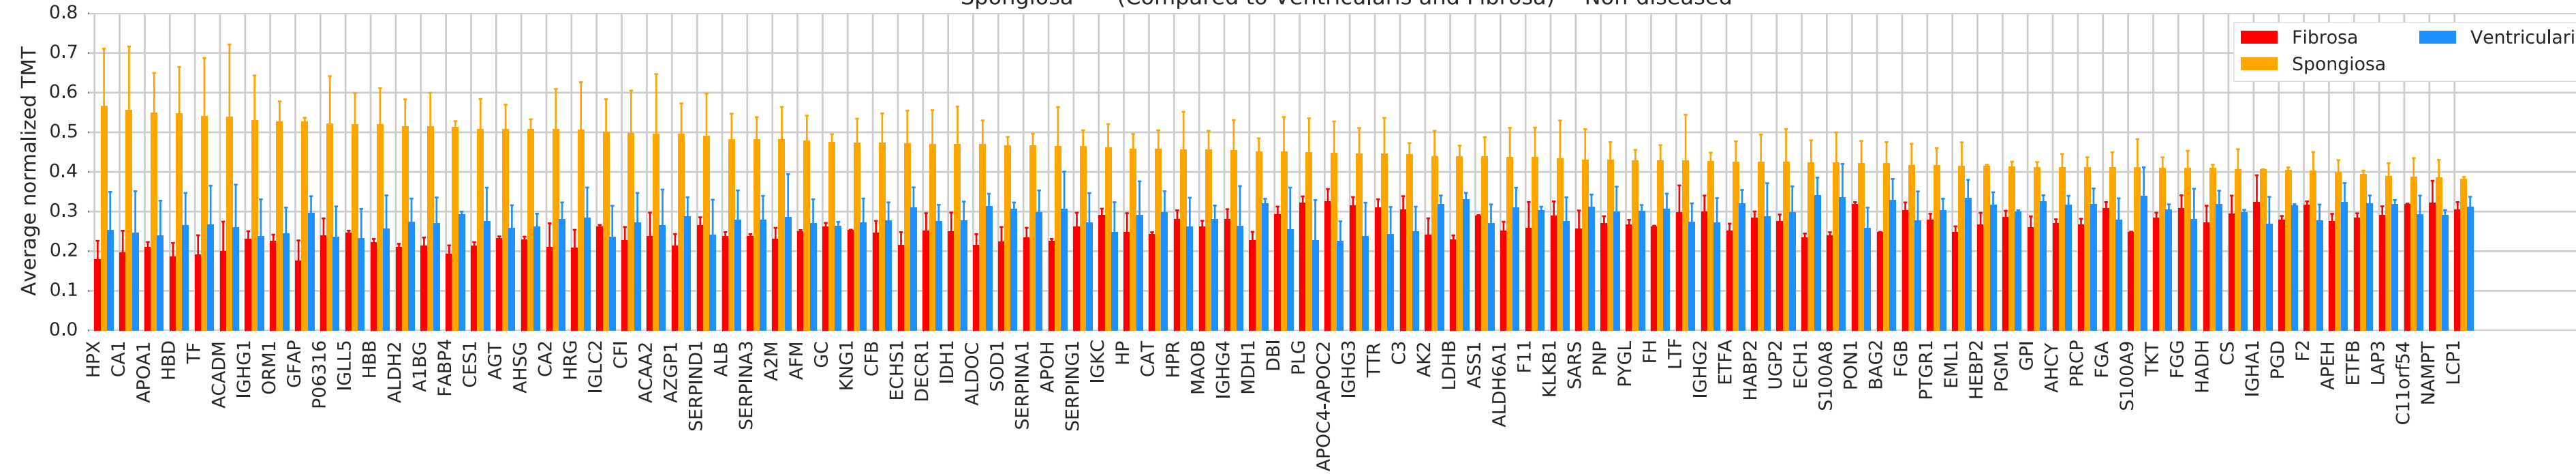

Ventricularis layer

Ventricularis (Compared to Fibrosa and Spongiosa) -- Non-diseased

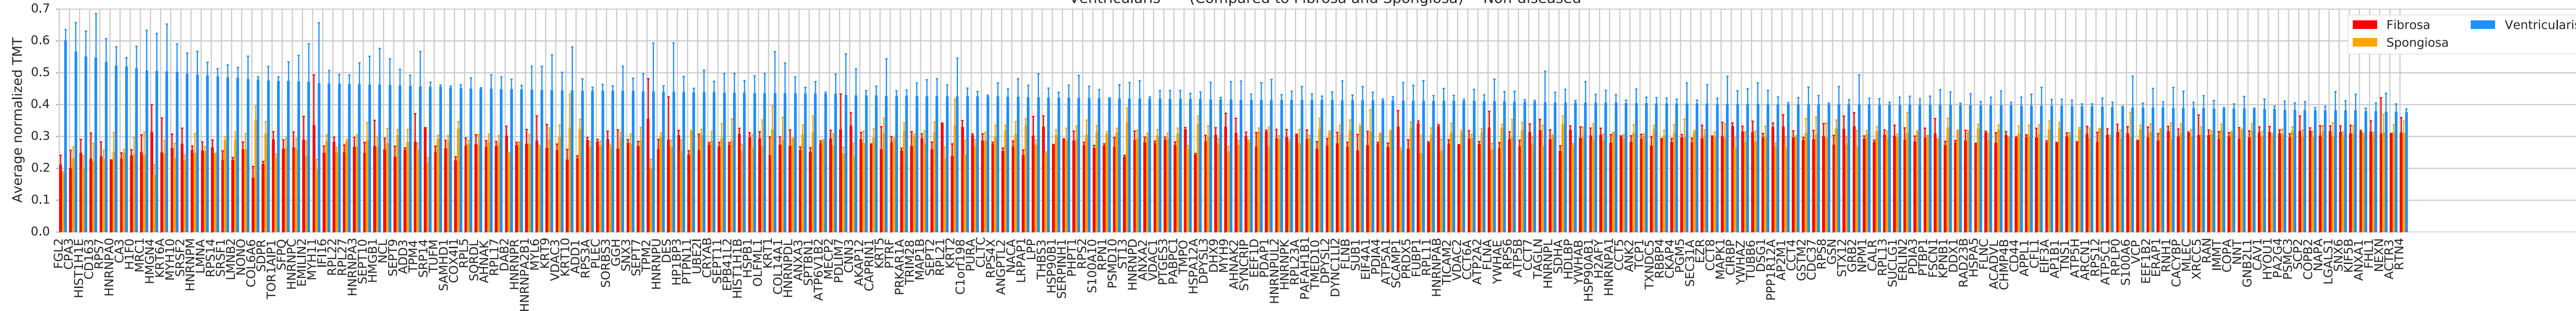

**Supplemental Figure 7: Leaflet Microlayer Non-diseased Donors Proteomics (CAVD Layers)**

Non-disease AV “layer-specific” proteins ranked according to their average normalized TMT in all three layers for non-diseased tissues (n=2).

Fibrosa layer

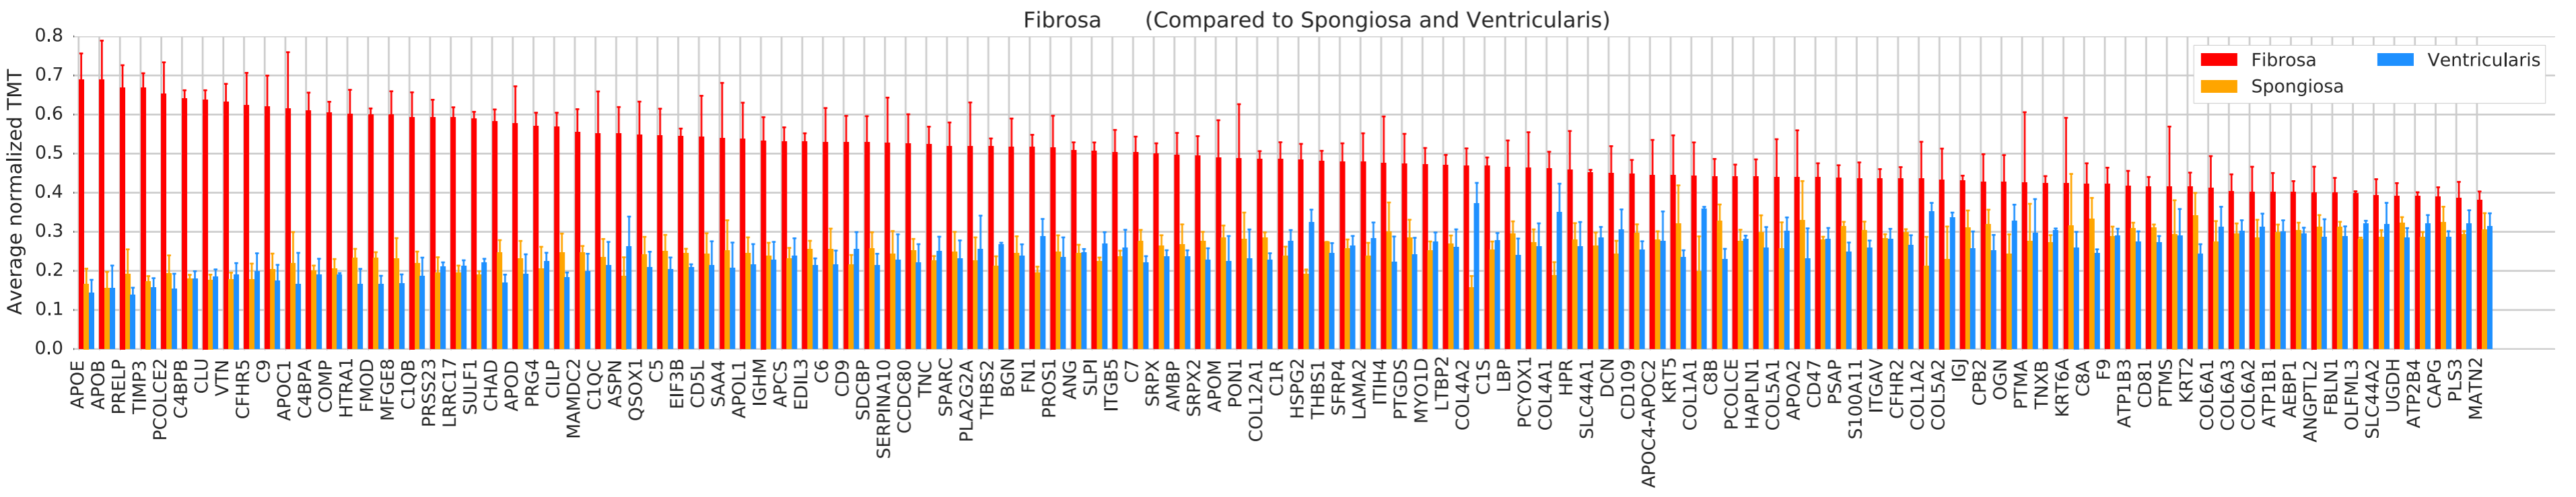

Spongiosa layer

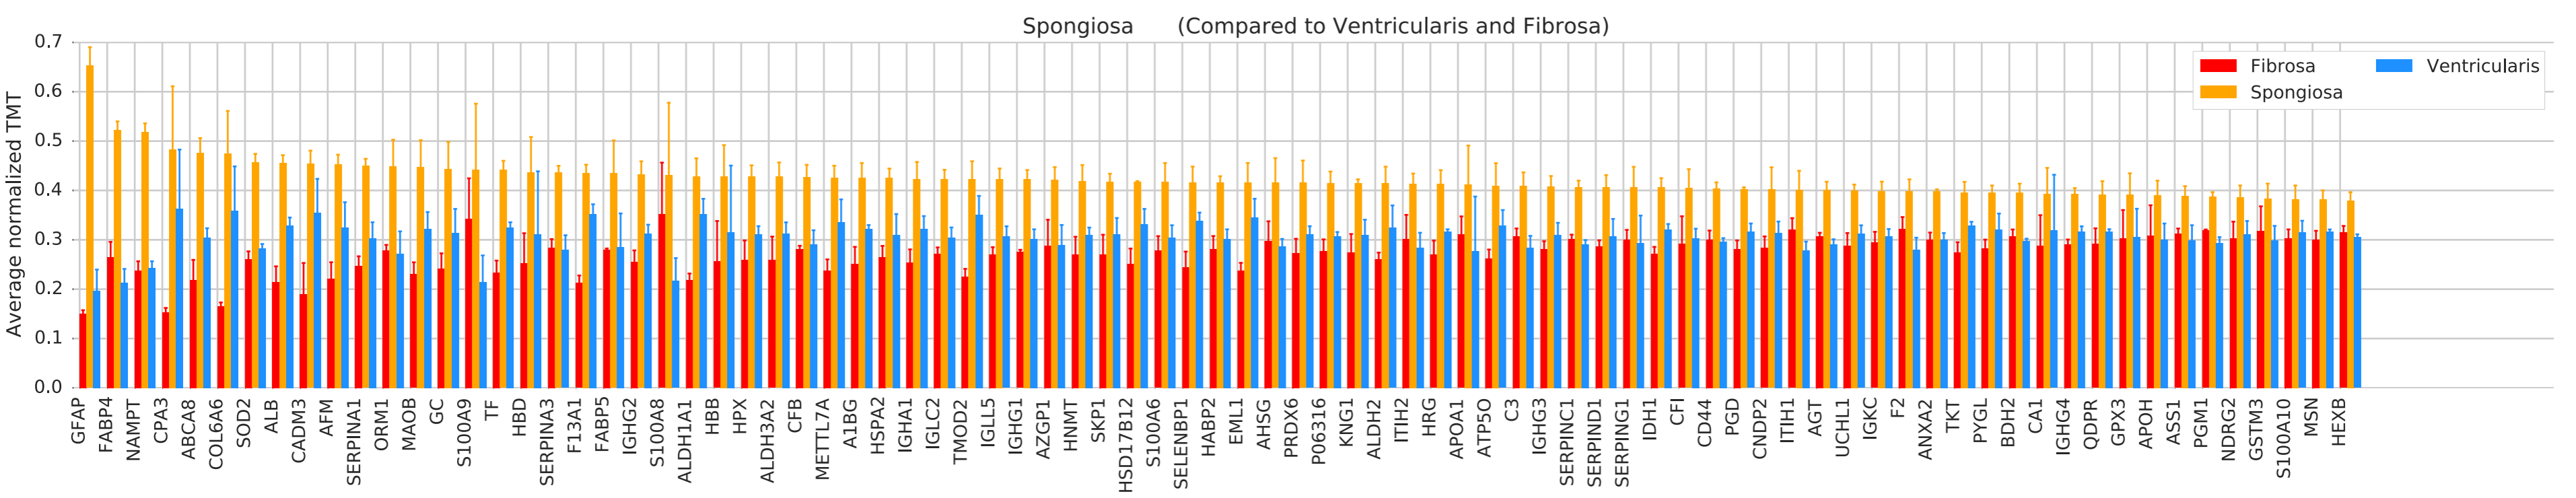

Ventricularis layer

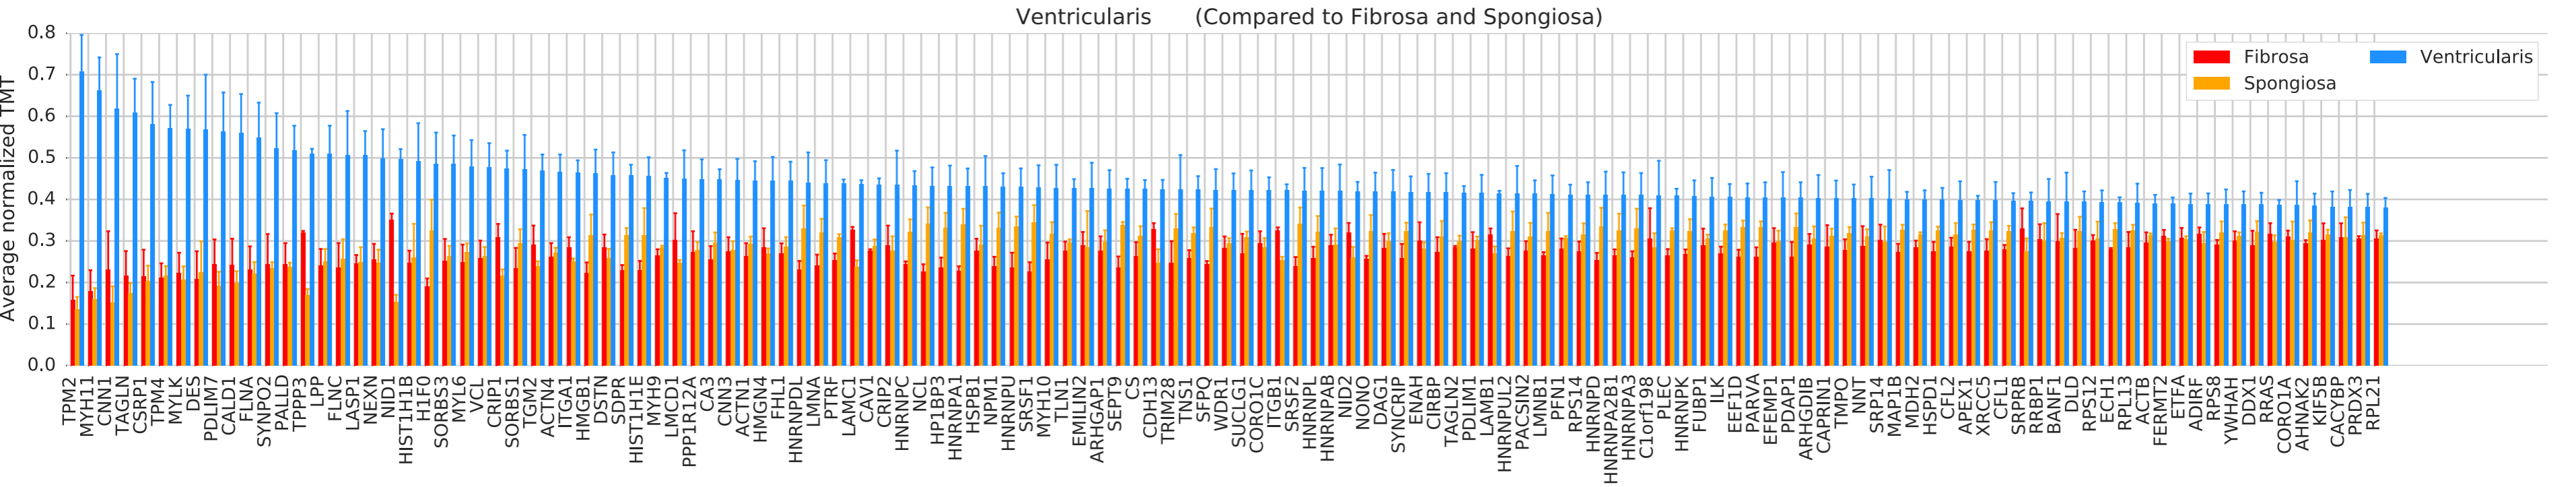

### **Supplemental Figure 8: Leaflet Microlayer CAVD Donors Proteomics**

AV “layer-specific” proteins ranked according to their average normalized TMT in all three layers for CAVD tissues (n=3).

# Supplemental Fig. 9

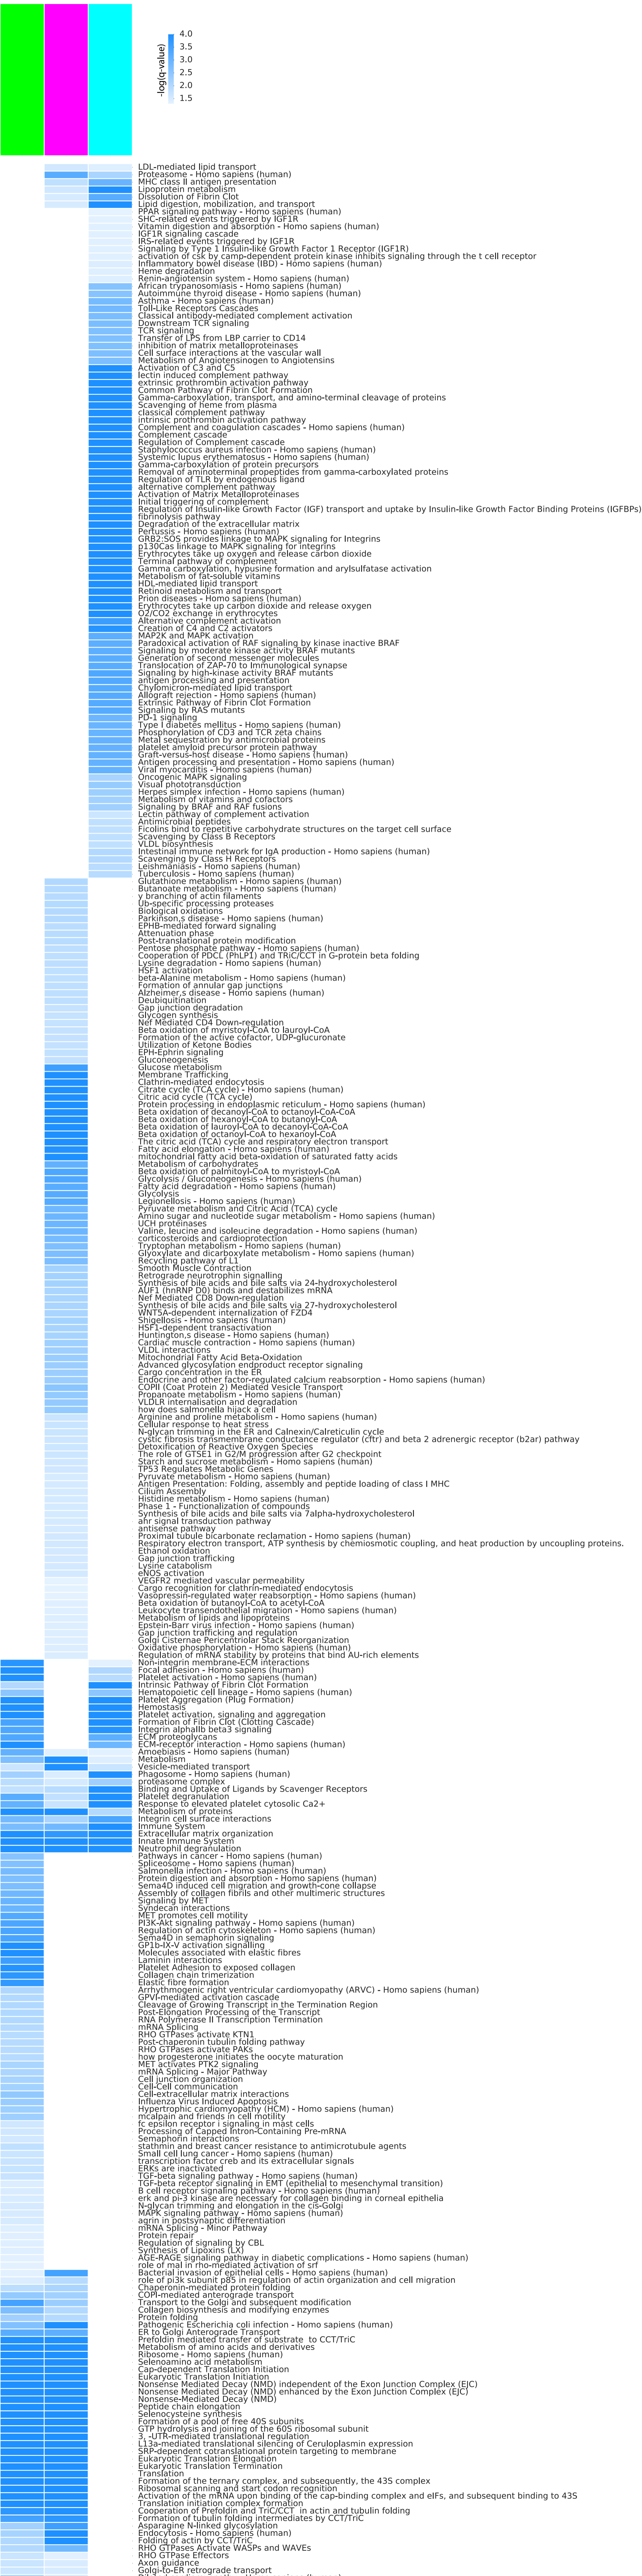

### **Supplemental Figure 9: CAVD Disease Stage Pathway Heatmap**

Pathways that are significantly enriched ( $q < 0.05$ ) in the non-diseased (ND, green), fibrotic (F, magenta), and calcific (C, cyan) stages, obtained from proteomics data (n=9 donors).

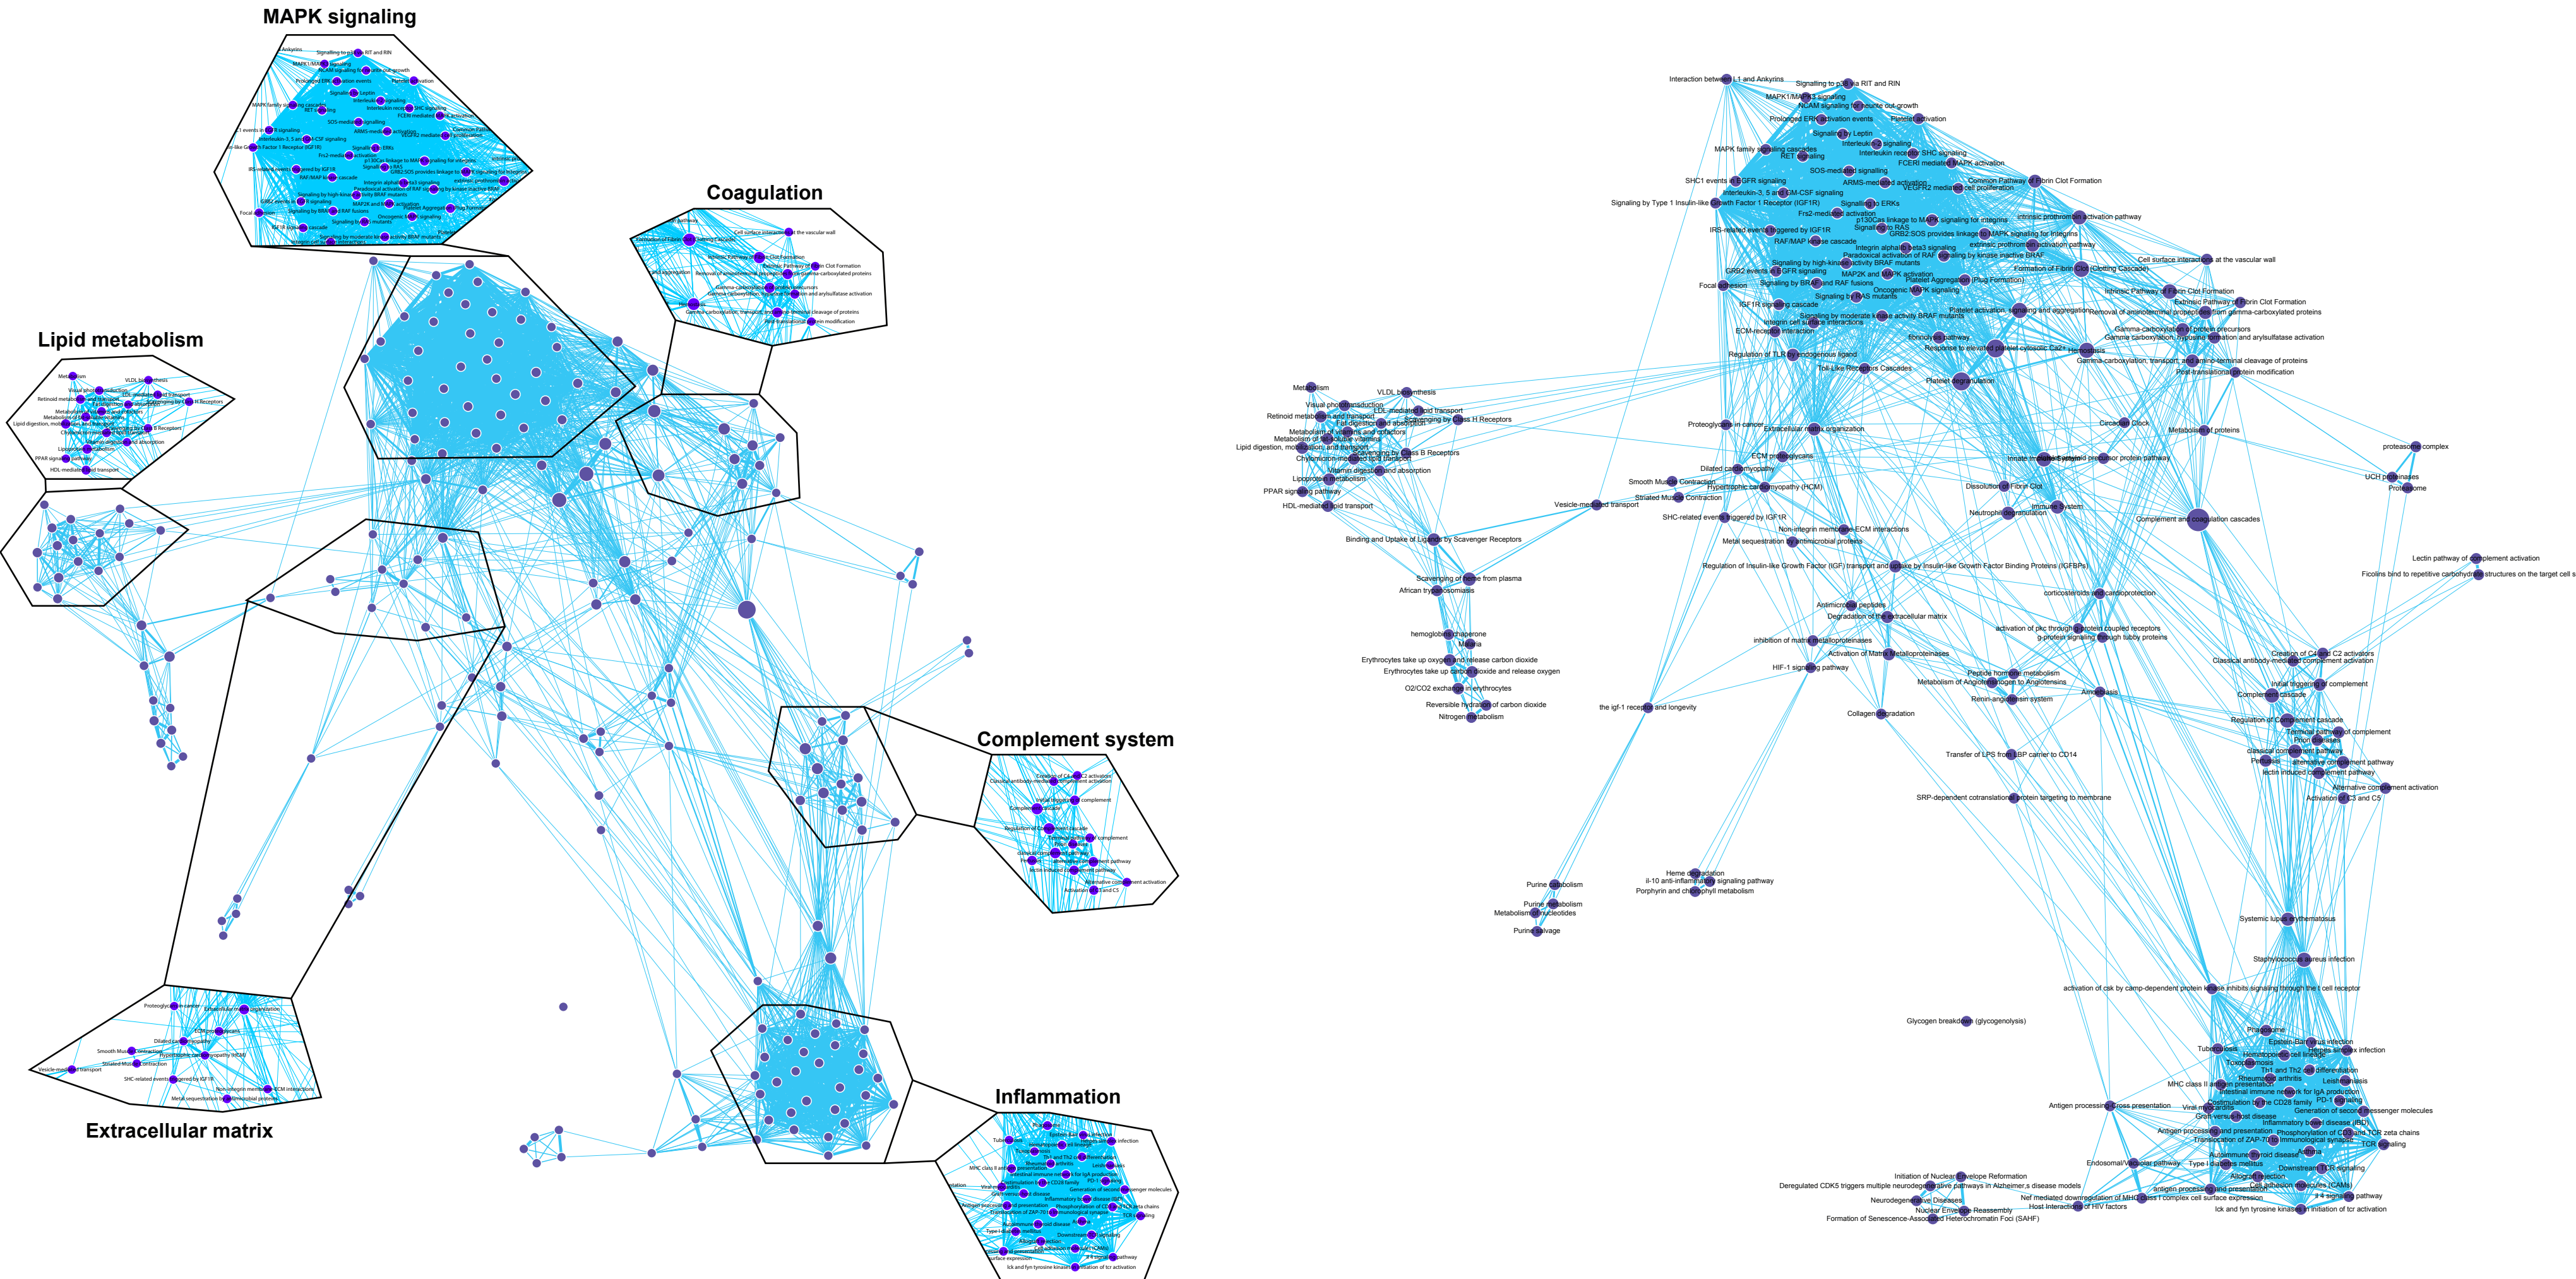

### **Supplemental Figure 10: Calcific Stage Pathway Network**

The network of significantly enriched pathways of the calcific stage from proteomics data. The size of nodes indicates the significance of each pathway in  $-\log(q\text{-value})$  and the edge thickness represents the overlap between the genes of the two pathways they connect, measured in terms of the Jaccard index.



# Supplemental Fig. 11

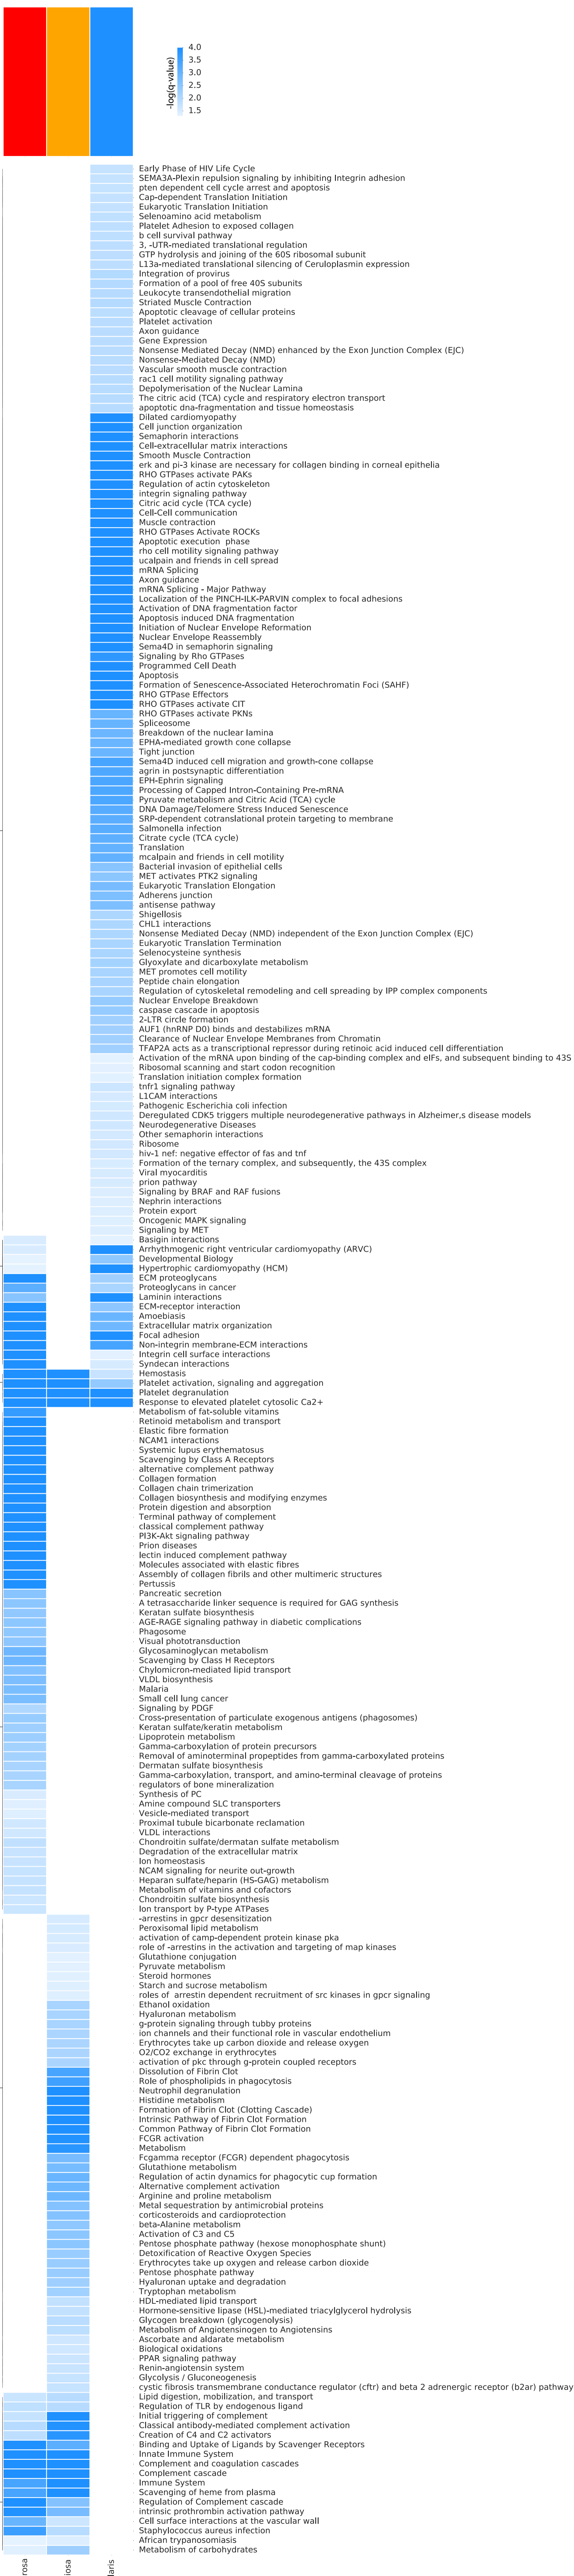

### **Supplemental Figure 11: CAVD Leaflet Layer Pathway Heatmap**

Pathways that are significantly enriched ( $q < 0.05$ ) in the fibrosa (red), spongiosa (orange), and ventricularis (blue) layers, obtained from proteomics data (n=3 CAVD AV samples).

# Supplemental Fig. 12

CAVD fibrosa pathway enrichment network (clusters highlighted)

## Extracellular matrix organization and PI3K-Akt signaling

## Glycosaminoglycan metabolism

CAVD fibrosa pathway enrichment network (all pathways)

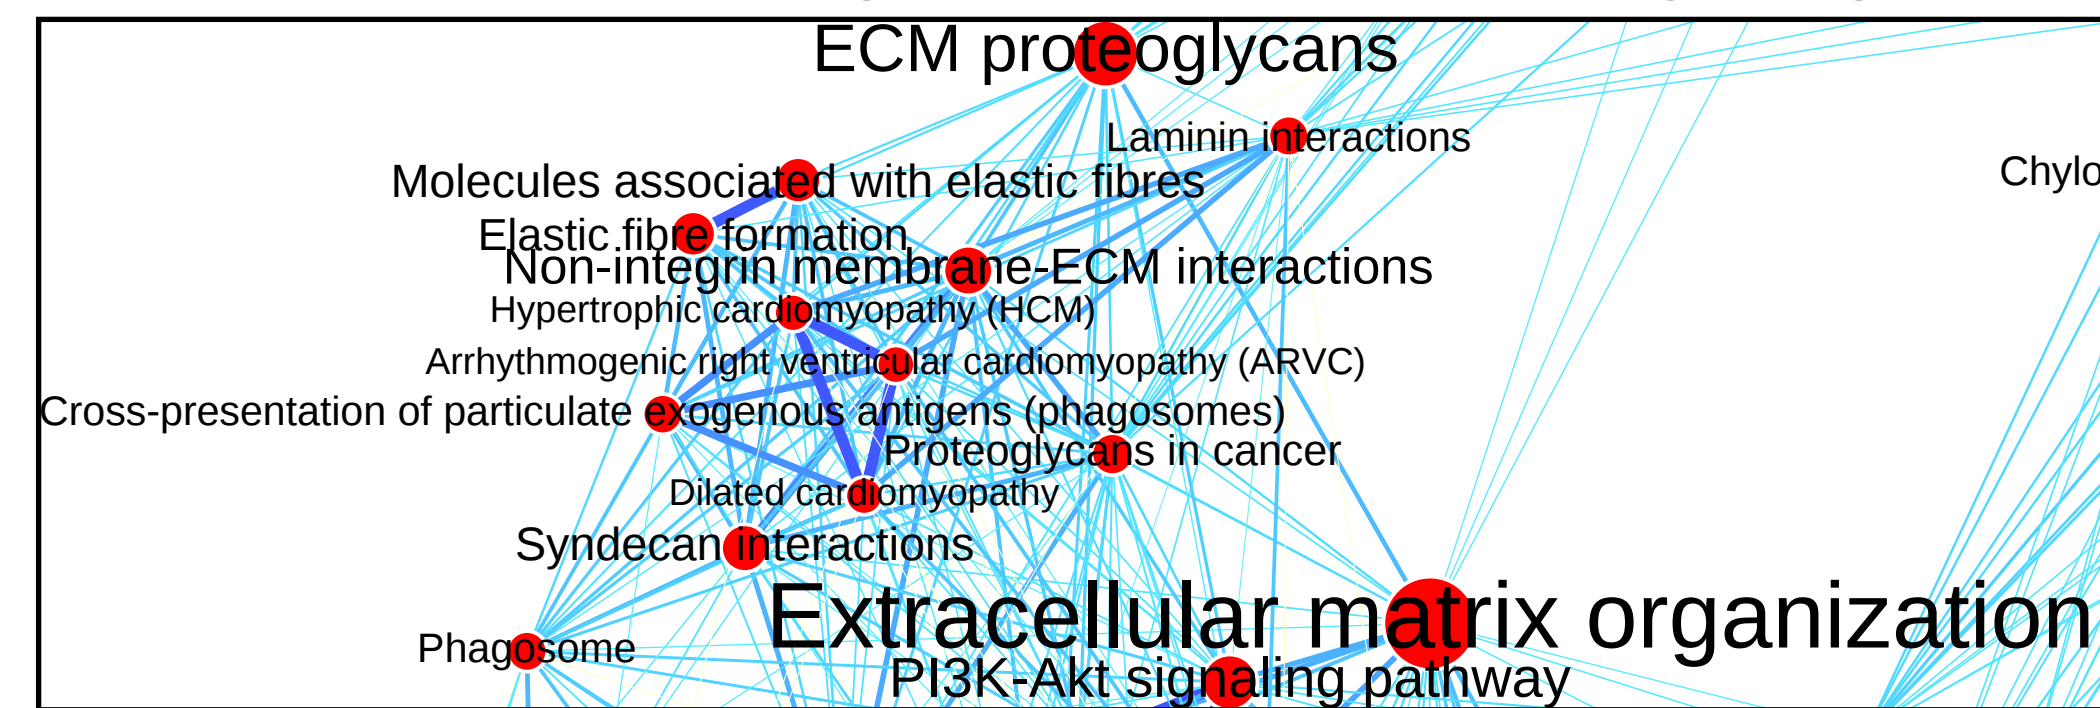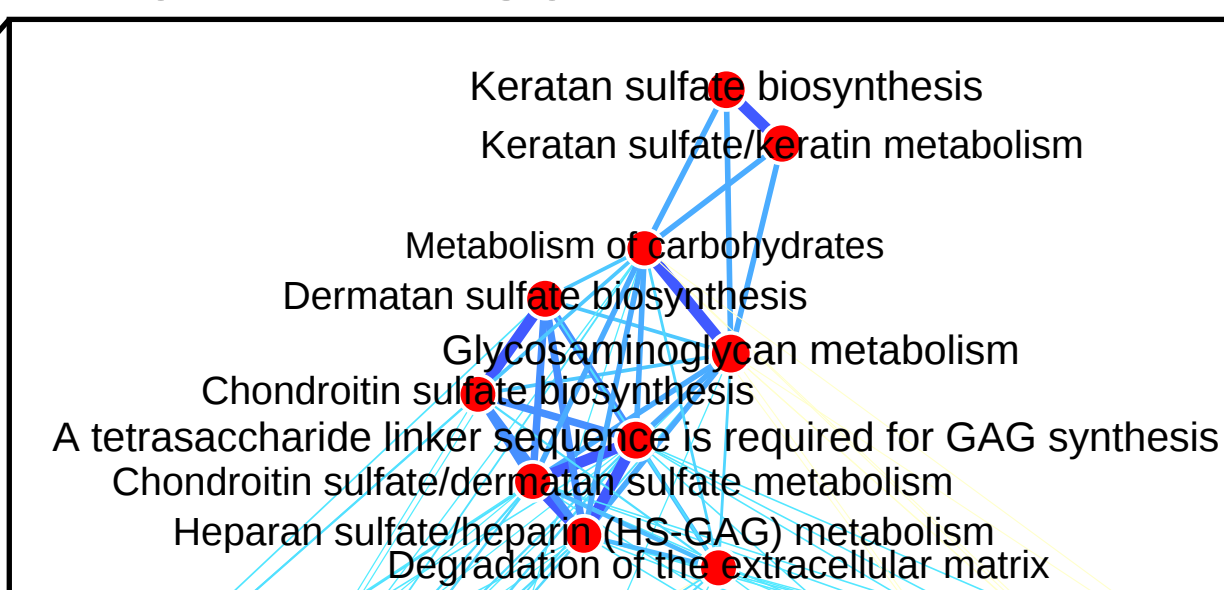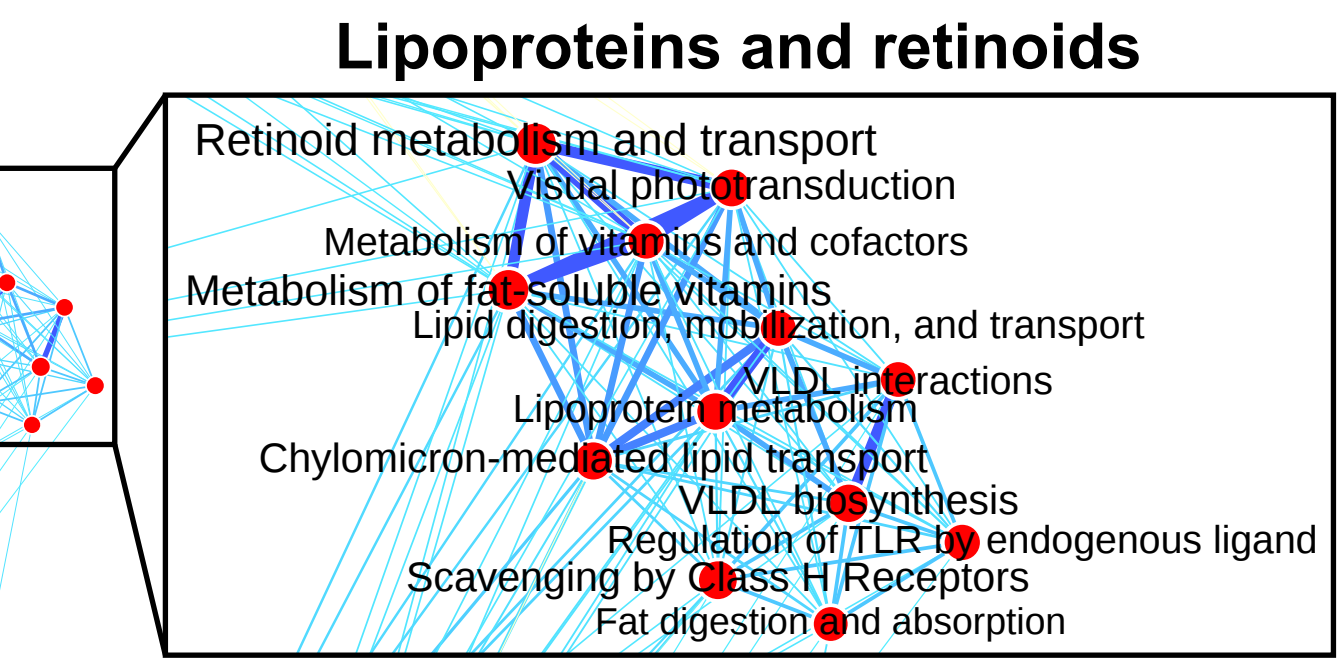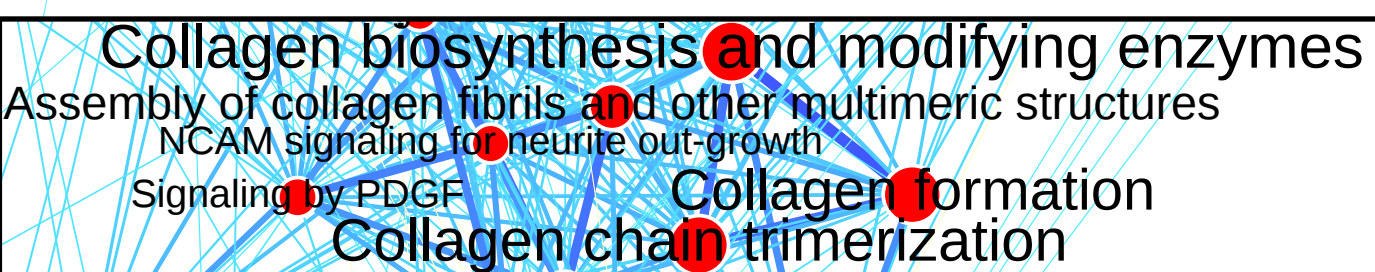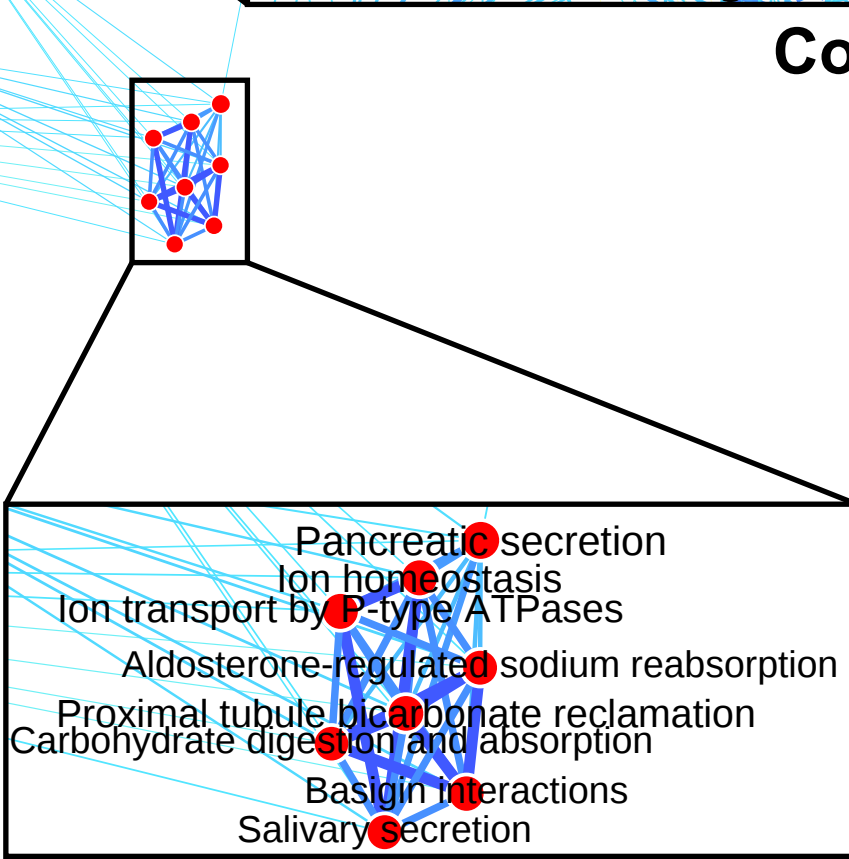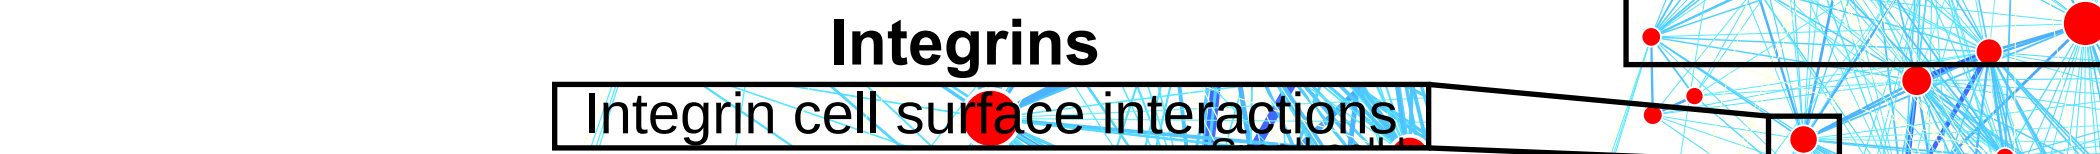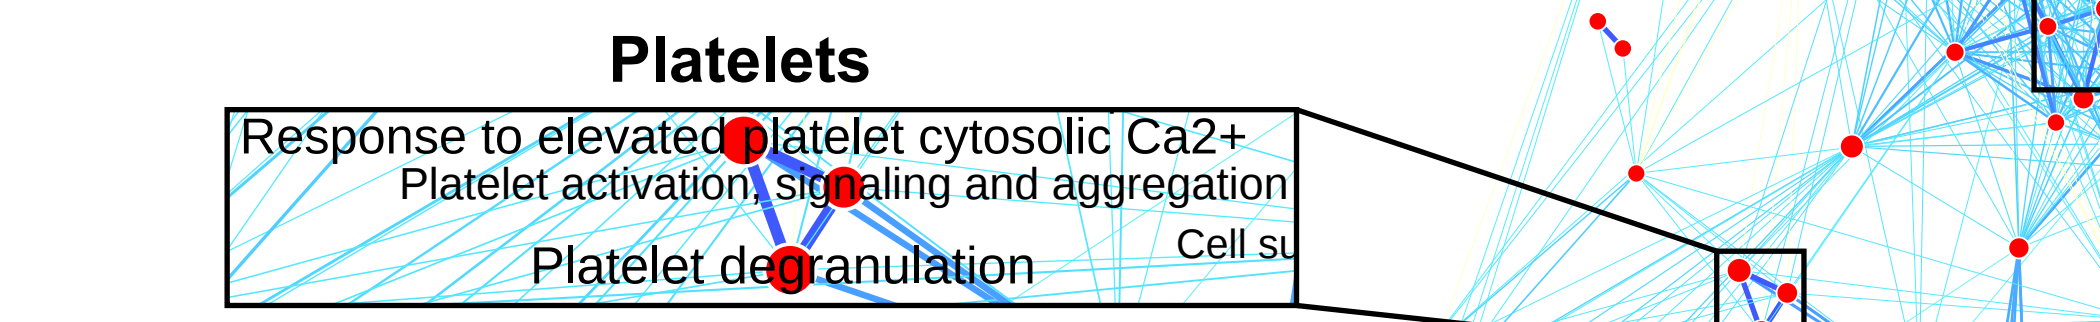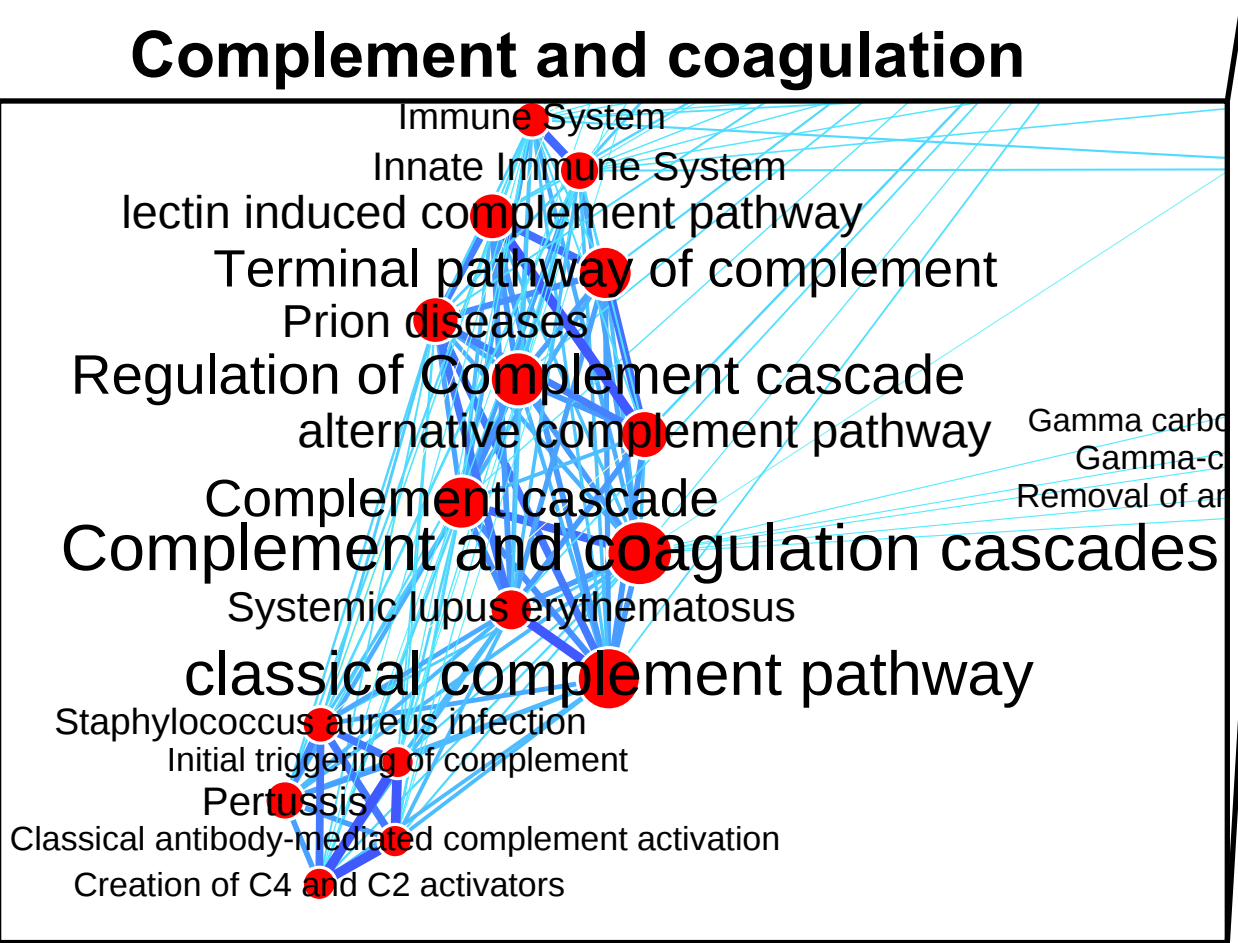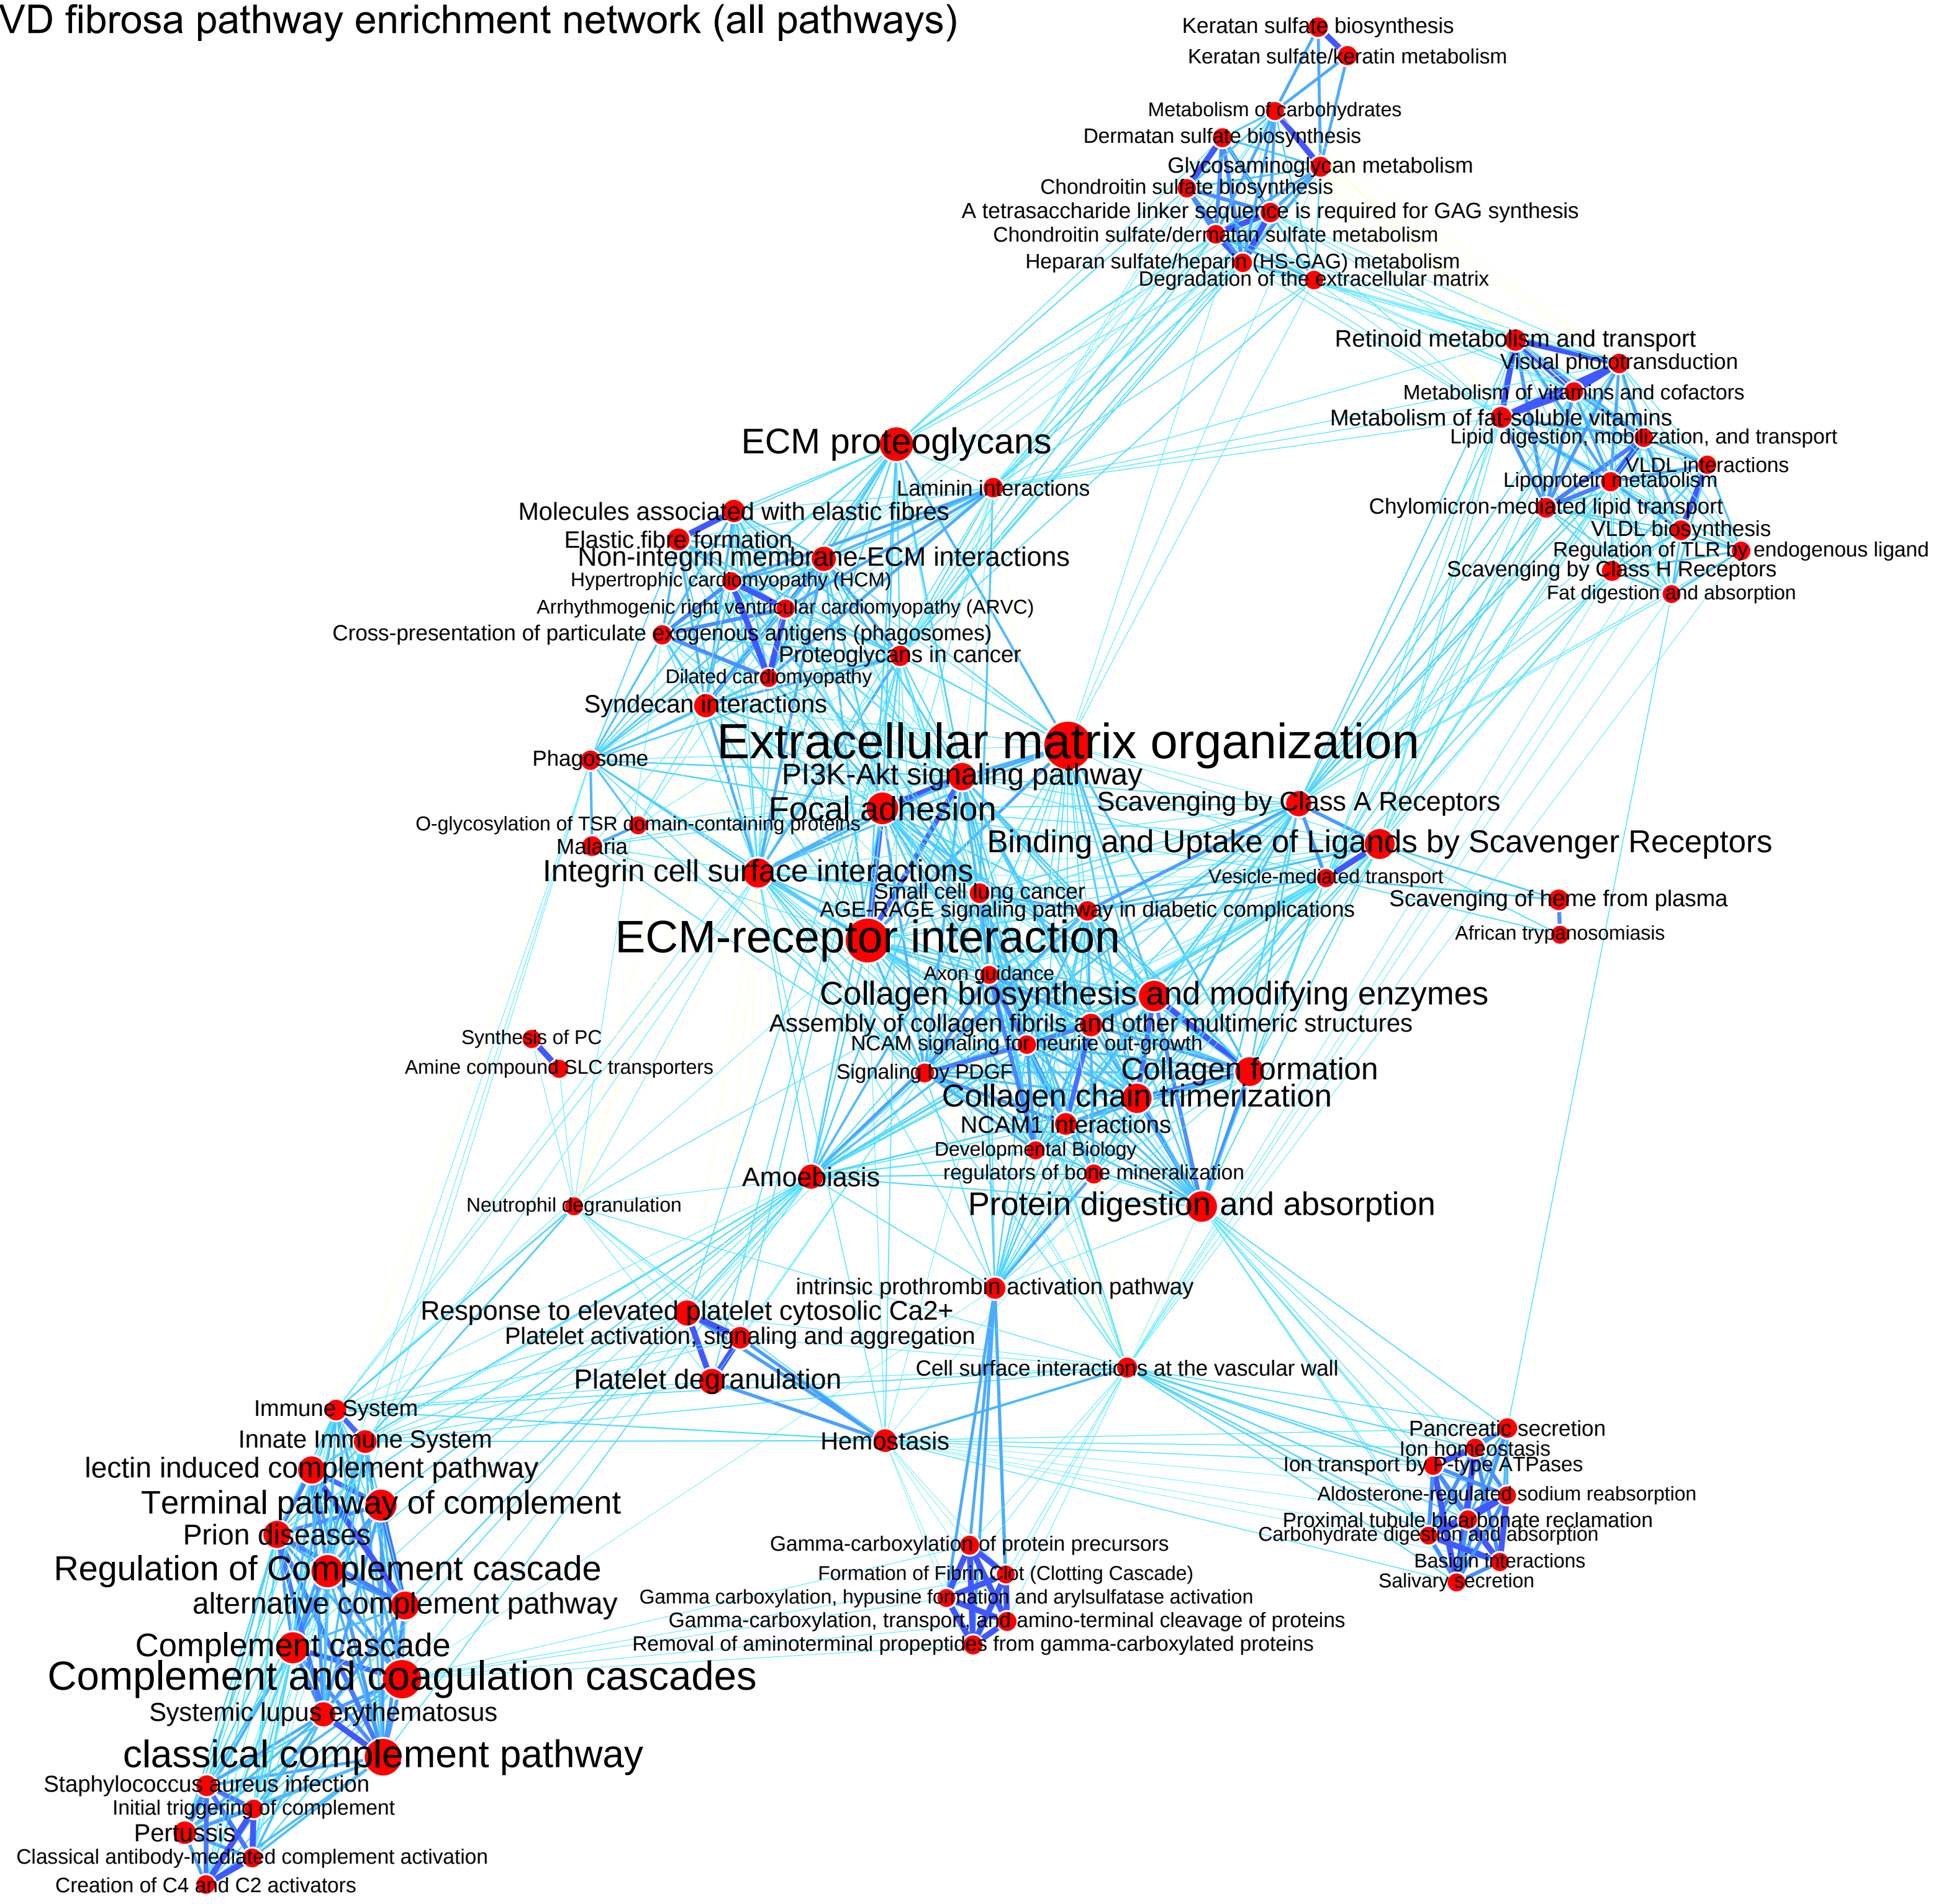

### **Supplemental Figure 12: CAVD Fibrosa Network**

The network of significantly enriched pathways of the CAVD fibrosa layer from proteomics data. The size of nodes indicates the significance of each pathway in  $-\log(q\text{-value})$  and the edge thickness represents the overlap between the genes of the two pathways they connect, measured in terms of the Jaccard index.

# Supplemental Fig. 13

## Ventricularis VICs-enriched pathways

| q-value  | Pathway                                              |
|----------|------------------------------------------------------|
| 0.001907 | Binding and Uptake of Ligands by Scavenger Receptors |
| 0.002426 | Glycolysis / Gluconeogenesis                         |
| 0.028974 | Extracellular matrix organization                    |

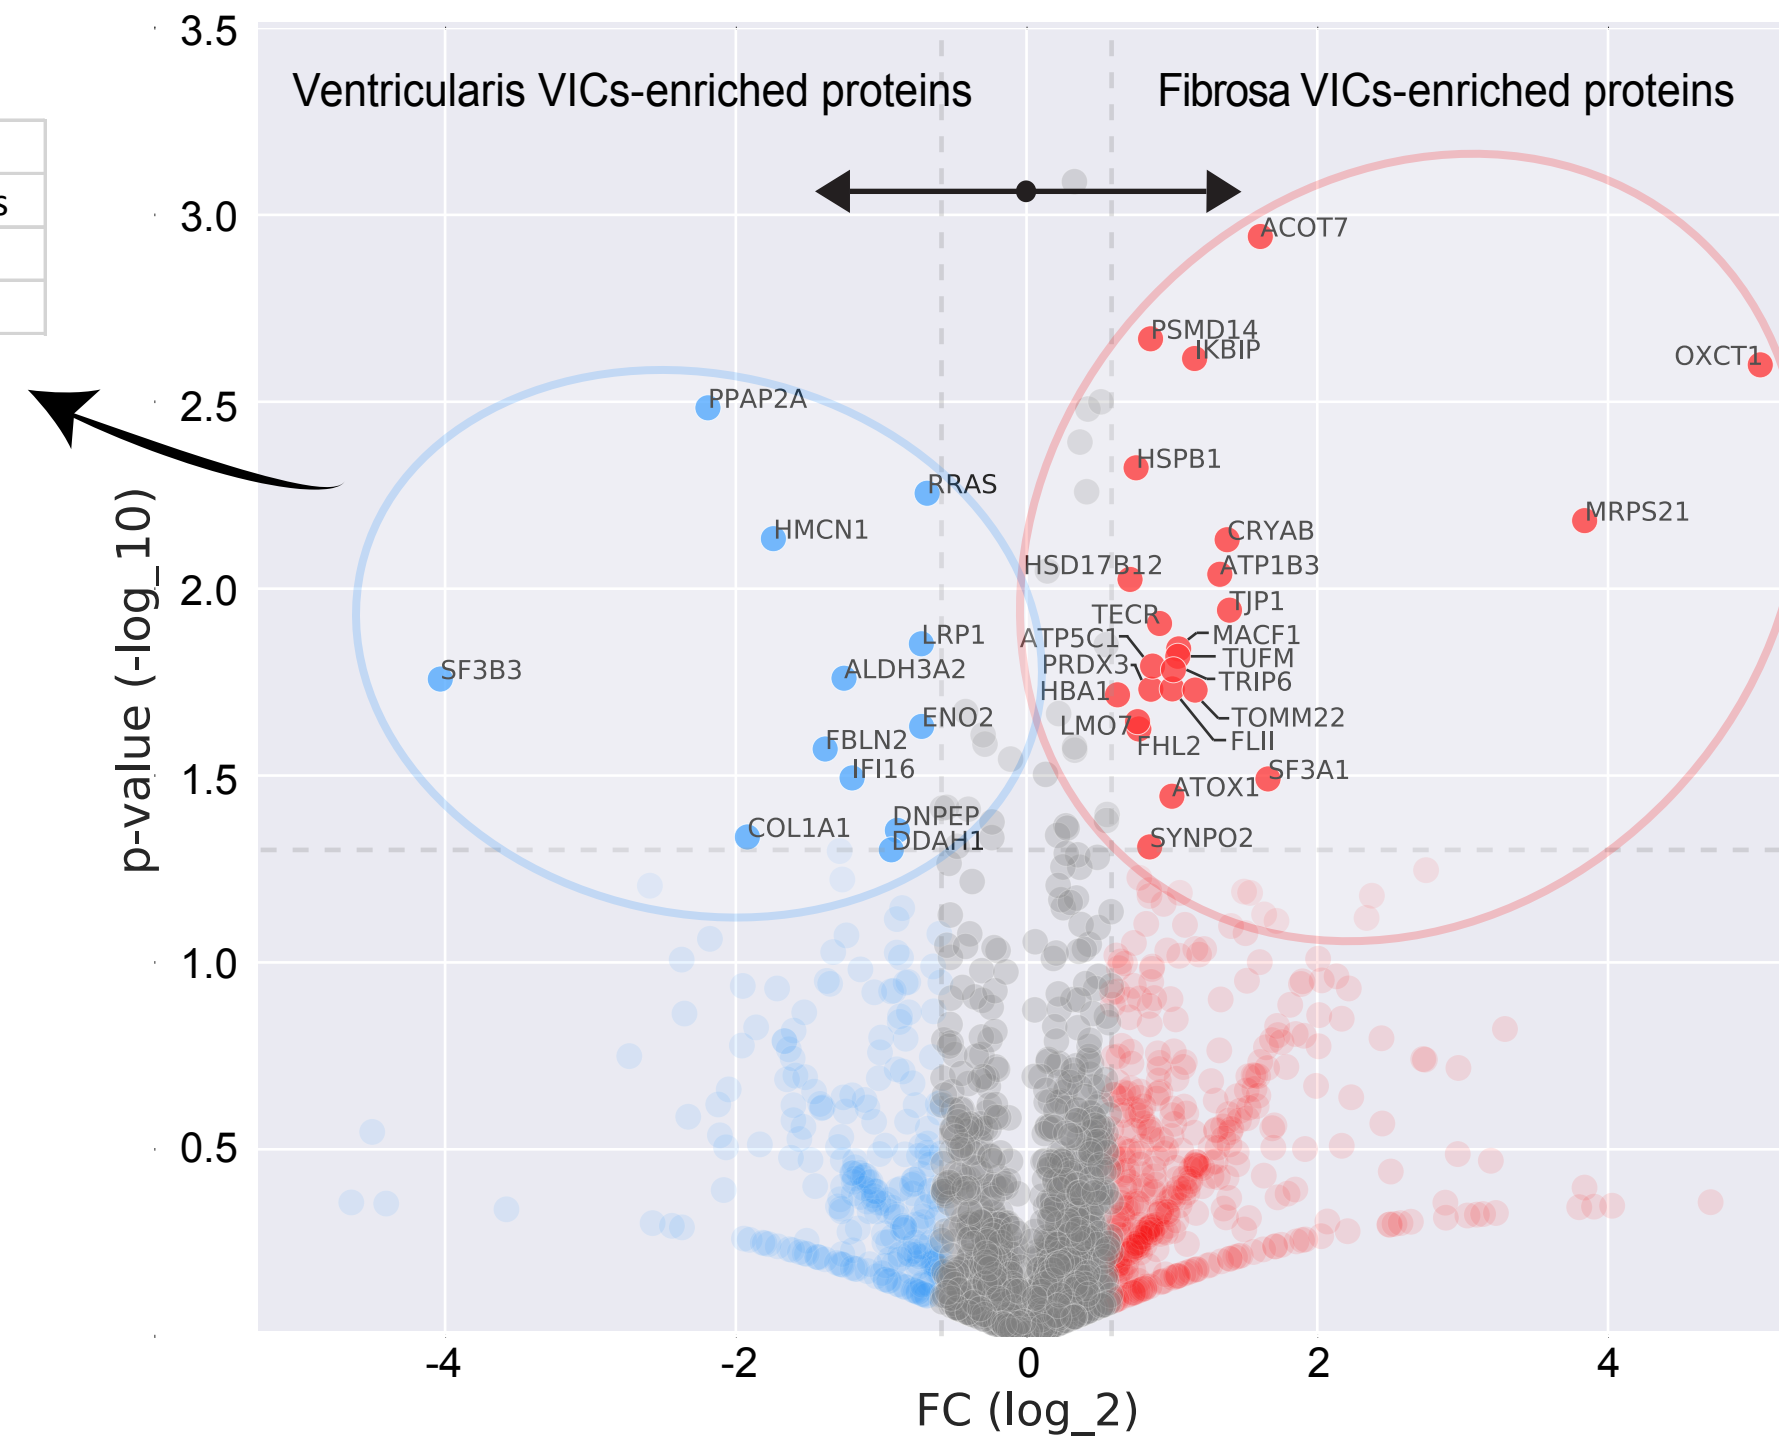

## Fibrosa VICs-enriched pathways

| q-value  | Pathway                                                 |
|----------|---------------------------------------------------------|
| 9.29E-05 | Biosynthesis of unsaturated fatty acids                 |
| 9.29E-05 | Fatty acid elongation                                   |
| 0.000536 | Fatty Acyl-CoA Biosynthesis                             |
| 0.000536 | Fatty acid, triacylglycerol, and ketone body metabolism |
| 0.001346 | Triglyceride Biosynthesis                               |
| 0.003381 | Synthesis of very long-chain fatty acyl-CoAs            |
| 0.009925 | Mineral absorption                                      |
| 0.016409 | Adherens junction                                       |
| 0.021498 | Mitochondrial translation elongation                    |
| 0.021962 | Mitochondrial translation                               |

### **Supplemental Figure 13: Fibrosa- and Ventricularis-derived VIC Enriched Proteins and Pathways (CAVD VICs)**

Volcano plot for the Day 0 proteomics data. Blue and red markers indicate “layer-specific” proteins enriched in ventricularis and fibrosa, respectively, with a fold change cutoff of 1.5. The significant ( $p < 0.05$ ) layer-specific proteins are denoted with their names. Enriched pathways ( $q < 0.05$ ) of the “layer-specific” proteins are provided.

# Supplemental Fig. 14

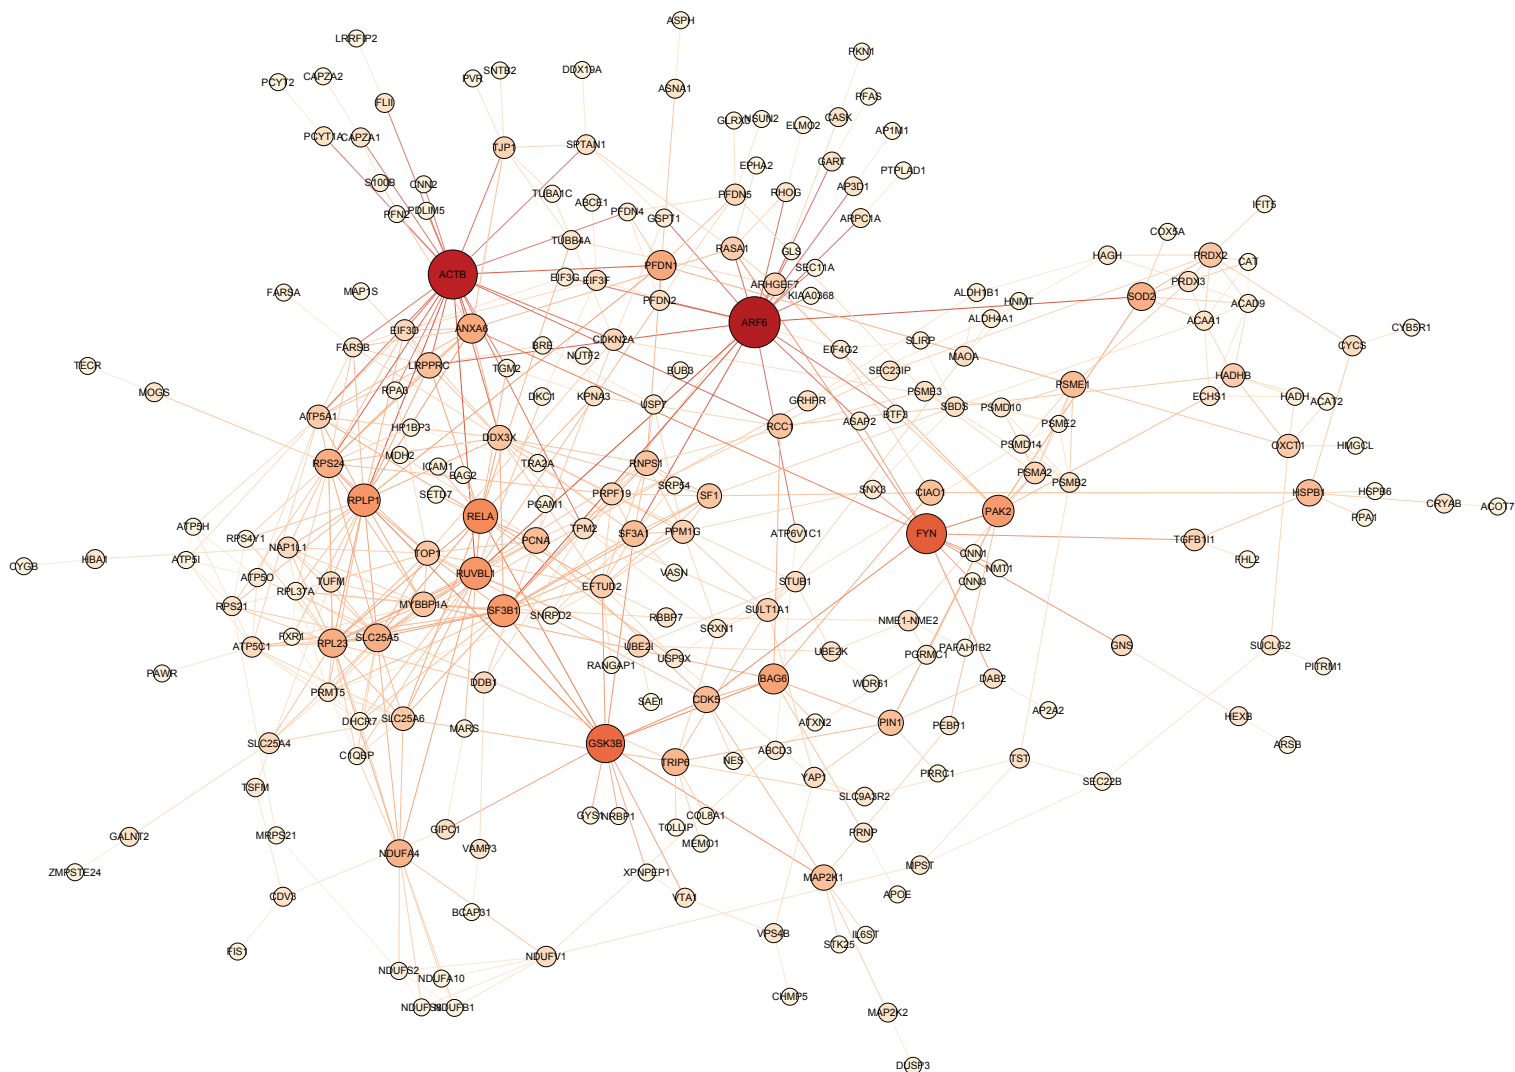

| Protein | Betweenness |
|---------|-------------|
| ARF6    | 0.16        |
| ACTB    | 0.15        |
| FYN     | 0.10        |
| GSK3B   | 0.10        |
| RELA    | 0.08        |
| RPLP1   | 0.07        |
| RUVBL1  | 0.07        |
| SF3B1   | 0.07        |
| PAK2    | 0.07        |
| BAG6    | 0.06        |
| PFDN1   | 0.06        |
| ANXA6   | 0.06        |
| RPS24   | 0.05        |
| RPL23   | 0.05        |
| SLC25A5 | 0.05        |
| SOD2    | 0.05        |
| NDUFA4  | 0.05        |
| TRIP6   | 0.04        |
| HSPB1   | 0.04        |
| CDK5    | 0.04        |

### **Supplemental Figure 14: Fibrosa VIC Protein Network**

The proteins overrepresented in the fibrosa layer with respect to the ventricularis layer (F/V FC>1.5) in the VIC cell proteomics, mapped onto the PPI network. Node size and color indicate betweenness centrality (a measure of how many shortest paths within the entire network pass through the node in question) with larger nodes with a darker shade of red having higher betweenness centrality.



# Supplemental Fig. 15

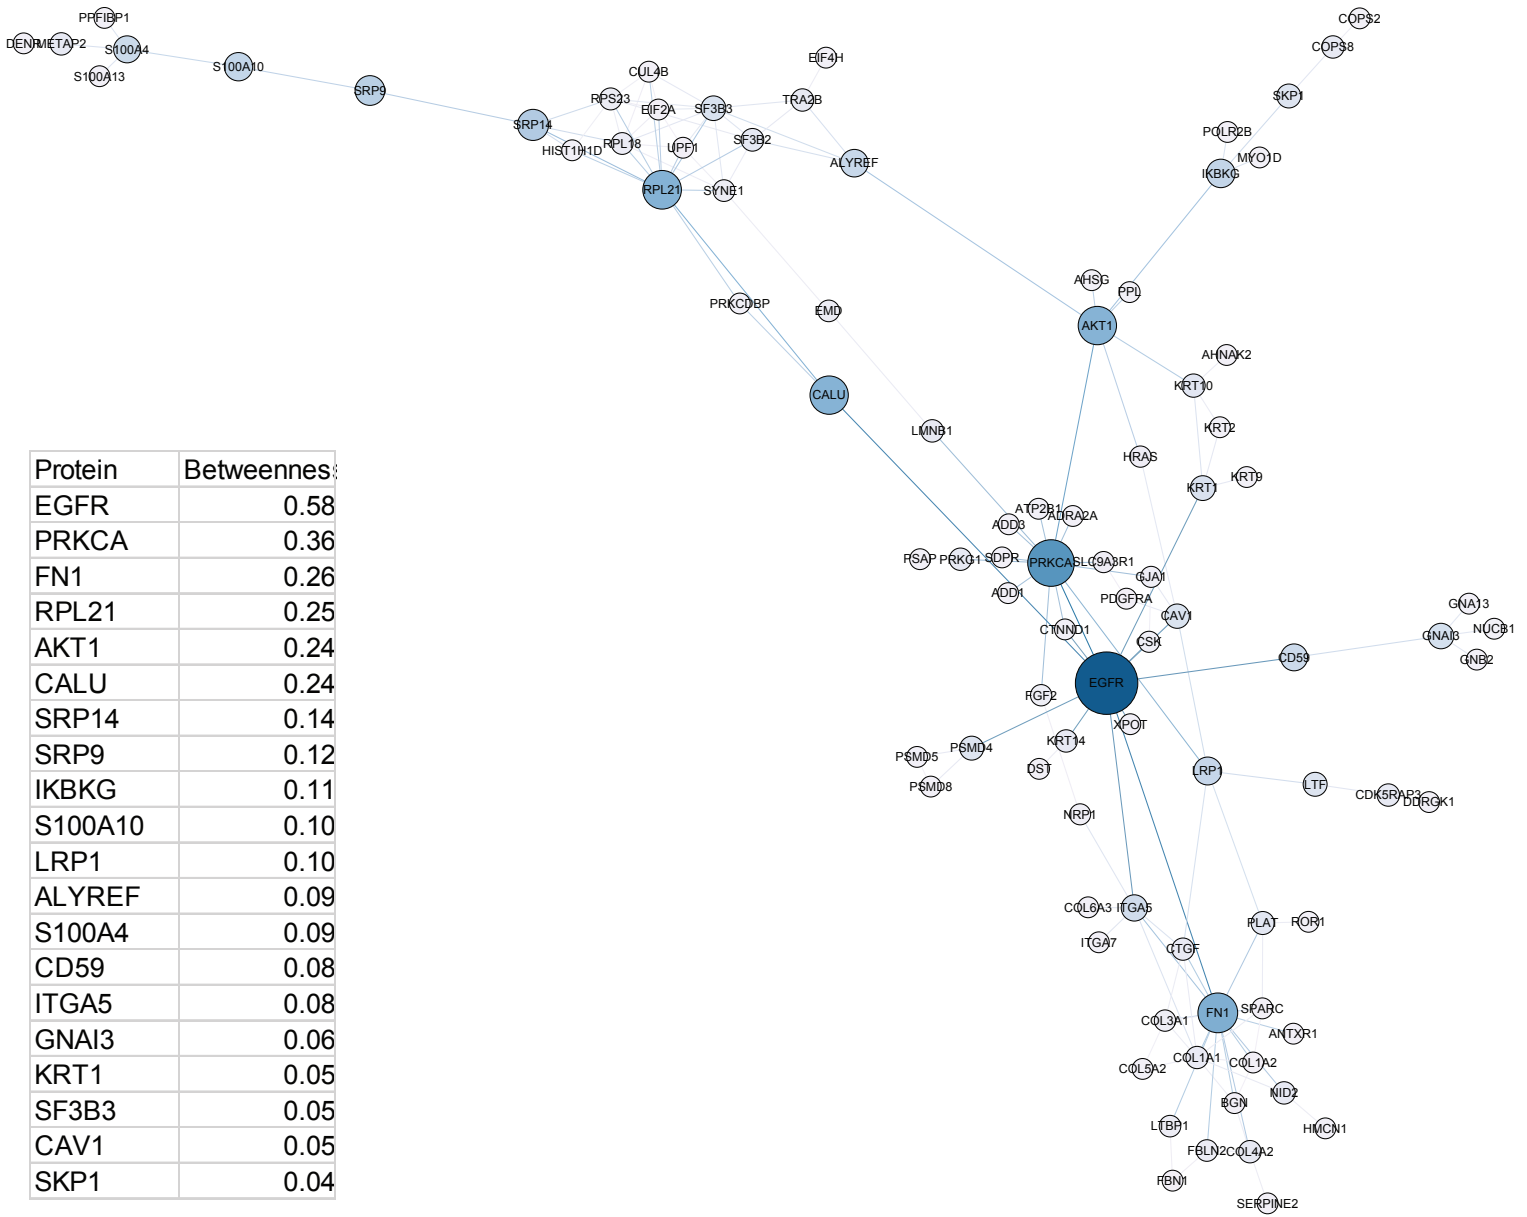

### **Supplemental Figure 15: Ventricularis VIC Protein Network**

The proteins over-represented in the ventricularis layer with respect to the fibrosa layer ( $F/V$   $FC < 1/1.5$ ) in the VIC cell proteomics, mapped onto the PPI network. Node size and color indicate betweenness centrality with larger nodes with a darker shade of blue having higher betweenness centrality.

# Supplemental Fig. 16

a

CAVD disease stages transcriptome (mean FPKM $\geq$ 1 in  $\geq$ 1 stage)

CAVD disease stages proteome ( $\geq$ 2 unique peptides)

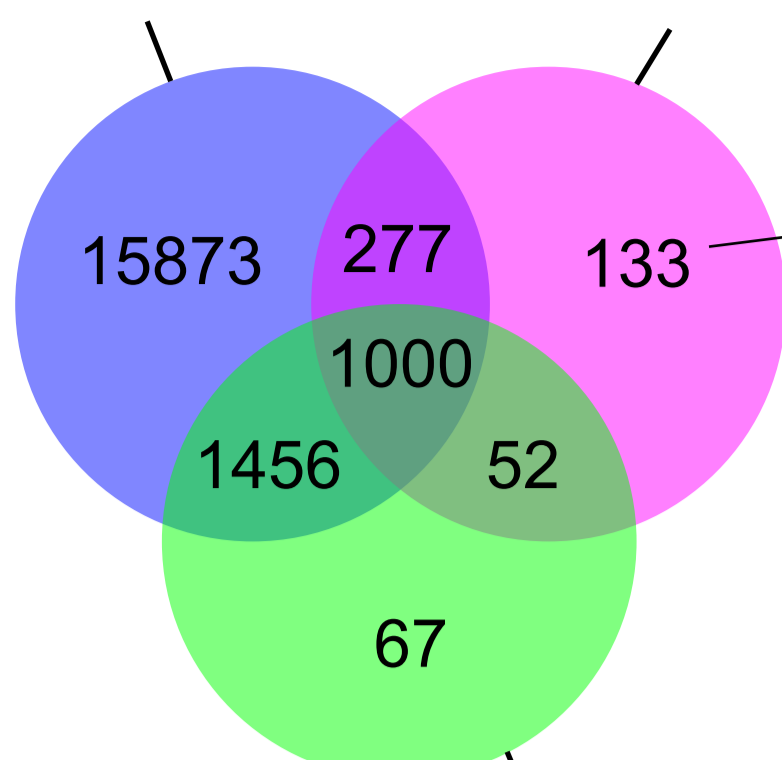

b

|             |
|-------------|
| AFM         |
| AMBP        |
| APCS        |
| APOA2       |
| APOA4       |
| APOA5       |
| APOC3       |
| APOC4-APOC2 |
| APOH        |
| APOM        |
| BCHE        |
| C2          |
| C4B         |
| C4BPA       |
| C8A         |
| C9          |
| CA1         |
| CD5L        |
| CDH1        |
| CFB         |
| CFHR2       |
| CFHR5       |
| CLC         |
| CPB2        |
| CPN1        |
| CPN2        |
| CRP         |
| DCD         |
| DEFA1       |
| DNPH1       |
| ELANE       |
| EPB42       |
| EPX         |
| F11         |
| F12         |
| F13B        |
| F9          |
| FCN2        |
| FETUB       |
| FGA         |
| FGB         |
| FGG         |
| FGL1        |
| GP1BA       |
| GP5         |
| GP9         |
| GPLD1       |
| GSTT2       |
| GYP A       |
| HABP2       |
| HBD         |
| HBG1        |
| HGFAC       |
| HLA-DPB1    |
| HLA-DQB1    |
| HLA-DRA     |
| HLA-DRB1    |
| HLA-DRB4    |
| HRG         |
| IGFALS      |
| IGHA1       |
| IGHA2       |
| IGHG2       |
| IGHG3       |
| IGHG4       |
| IGHM        |
| IGKC        |
| IGKV1-5     |
| INHBE       |
| ITGA2B      |
| ITIH1       |
| K7N7A8      |
| KNG1        |
| KRT6A       |
| KRT6B       |
| LPA         |
| LRG1        |
| MMP23A      |
| MPO         |
| ORM1        |
| ORM2        |
| P01597      |
| P01598      |
| P01610      |
| P01611      |
| P01612      |
| P01621      |
| P01623      |
| P01701      |
| P01703      |
| P01714      |
| P01743      |
| P01763      |
| P01764      |
| P01766      |
| P01768      |
| P01779      |
| P01781      |
| P04208      |
| P04220      |
| P04433      |
| P06310      |
| P06316      |
| P06331      |
| P23083      |
| P80748      |
| PF4V1       |
| PGLYRP2     |
| PLG         |
| PON1        |
| PPBP        |
| PRG3        |
| PROC        |
| PROZ        |
| PZP         |
| RNASE3      |
| RTN4        |
| SAA4        |
| SBSPON      |
| SEPT5       |
| SERPINA10   |
| SERPINA4    |
| SERPINA6    |
| SERPINA7    |
| SERPINC1    |
| SERPIND1    |
| SHBG        |
| SLC2A14     |
| SLC4A1      |
| SPP2        |
| SPTA1       |
| TNXB        |
| TTR         |

VIC *in vitro* proteome ( $\geq$ 2 unique peptides)

c

Human plasma proteome

133 CAVD disease stages proteomics exclusive proteins

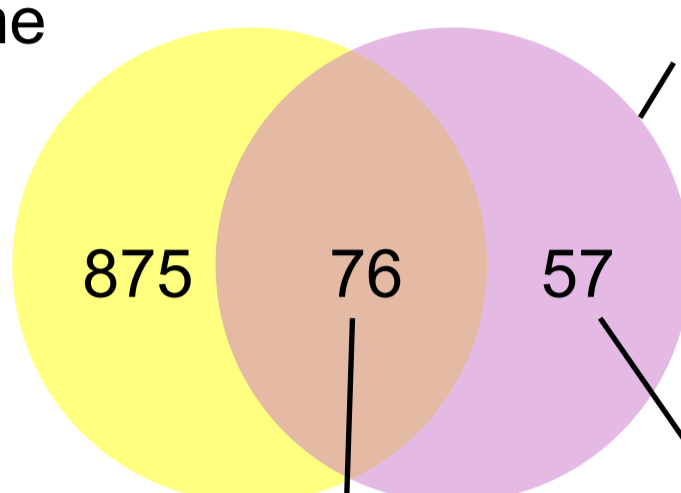

(57% of 133)

(43% of 133)

|           |
|-----------|
| AFM       |
| ORM1      |
| ORM2      |
| SERPINC1  |
| APOA2     |
| APOA4     |
| APOA5     |
| APOC3     |
| APOM      |
| LPA       |
| APOH      |
| C4BPA     |
| CDH1      |
| CA1       |
| CPB2      |
| CPN1      |
| CPN2      |
| CD5L      |
| BCHE      |
| F9        |
| F11       |
| F12       |
| F13B      |
| C2        |
| C4B       |
| C8A       |
| C9        |
| CFB       |
| CFHR2     |
| CFHR5     |
| SERPINA6  |
| CRP       |
| DCD       |
| FETUB     |
| FGA       |
| FGB       |
| FGG       |
| FGL1      |
| FCN2      |
| HBD       |
| SERPIND1  |
| HGFAC     |
| HRG       |
| HABP2     |
| IGHA1     |
| IGHA2     |
| IGHG2     |
| IGHG3     |
| IGHG4     |
| IGKC      |
| IGKV1-5   |
| IGHM      |
| IGFALS    |
| ITIH1     |
| SERPINA4  |
| KNG1      |
| LRG1      |
| PGLYRP2   |
| GPLD1     |
| PLG       |
| PPBP      |
| GP1BA     |
| GP5       |
| PZP       |
| AMBP      |
| SERPINA10 |
| SPP2      |
| SAA4      |
| APCS      |
| PON1      |
| SHBG      |
| TNXB      |
| SERPINA7  |
| TTR       |
| PROC      |
| PROZ      |

**Supplemental Figure 16: Venn Diagram for CAVD Disease Stage Transcriptome, VIC and CAVD Disease-associated Stage Proteome**

**a.** CAVD disease stage transcriptomics (FPKM  $\geq 1$  in at least one stage), CAVD disease stage proteomics ( $\geq 2$  unique peptides), and the VIC *in vitro* proteome ( $\geq 2$  unique peptides) and their commonly detected fractions

**b.** 133 proteins/transcripts were exclusively detected in the CAVD disease stage proteome, which are provided in a list.

**c.** Venn diagram of 133 proteins that were exclusively detected in the CAVD disease stage proteome and a human plasma proteome; the list provides the overlapping proteins

# Supplemental Fig. 17

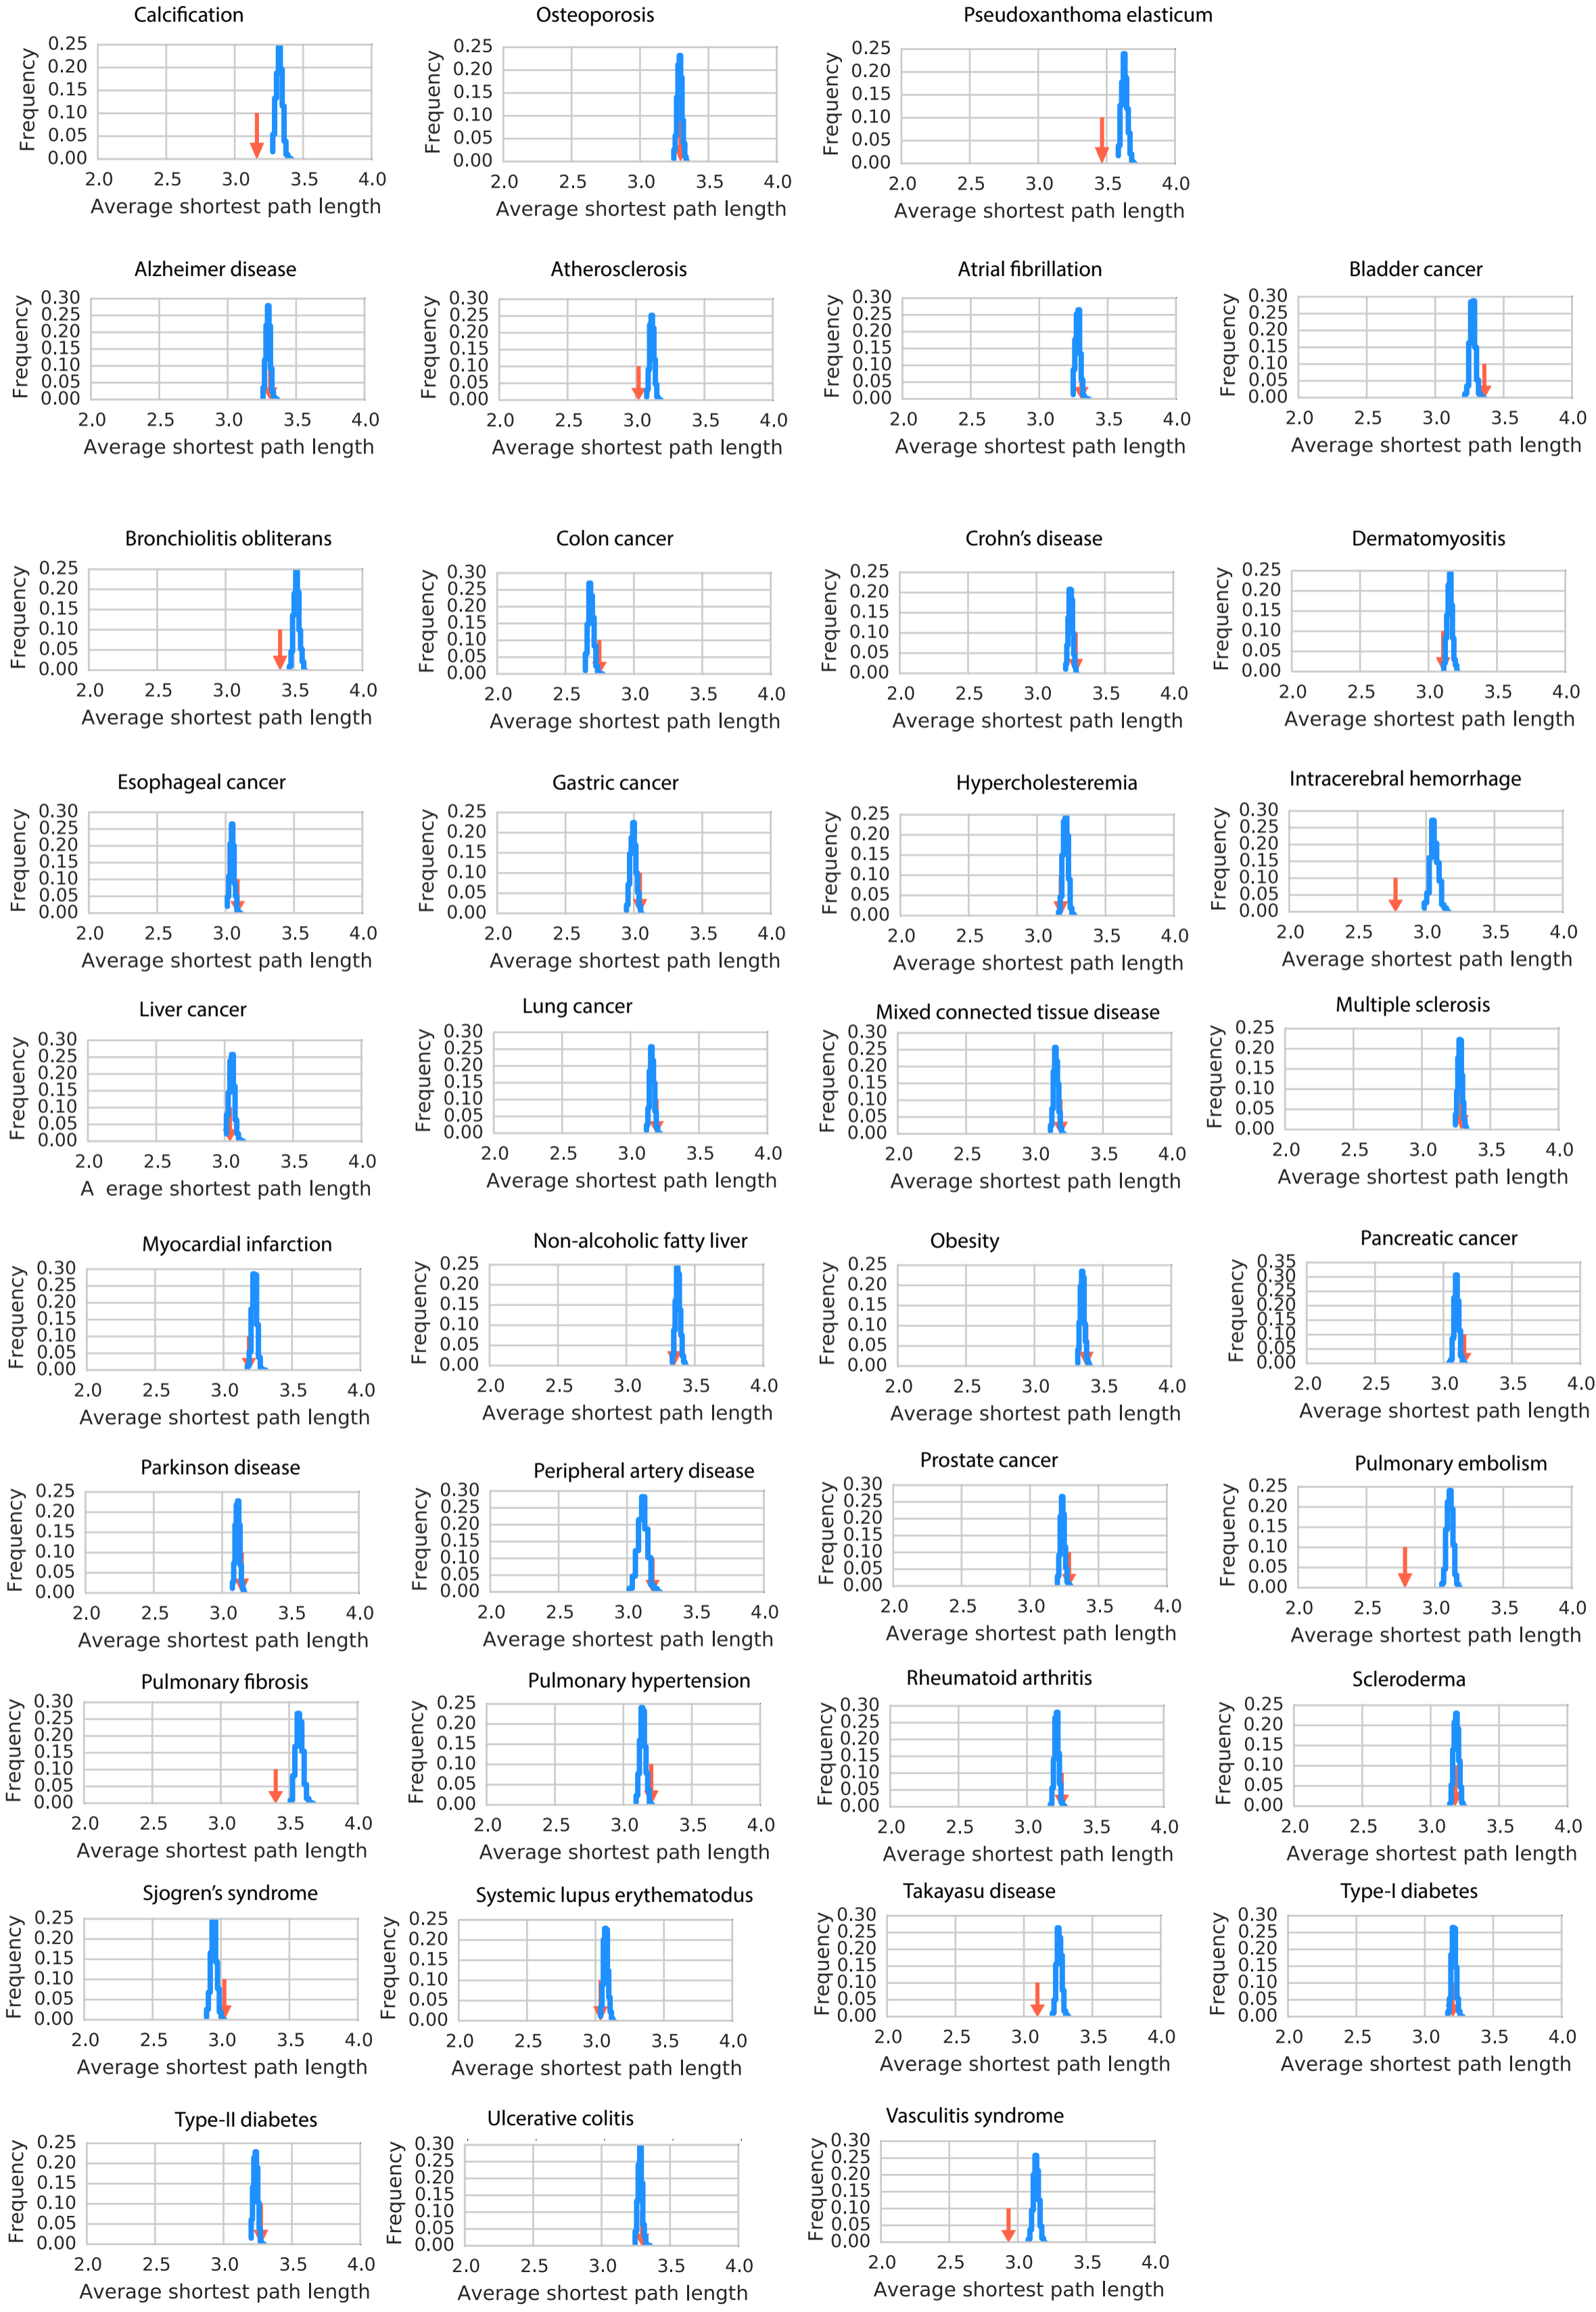

### **Supplemental Figure 17: Average Shortest Path Length Distributions between CAVD and Human Diseases**

The average shortest path length between the calcific disease stage module and the respective disease genes are shown with the red arrow. The average shortest path lengths between the CAVD module and randomly selected genes (using degree-preserving randomization) of the same size as the disease gene set are shown with the blue distribution (for  $n=1,000$  realizations).

Supplemental Fig. 18

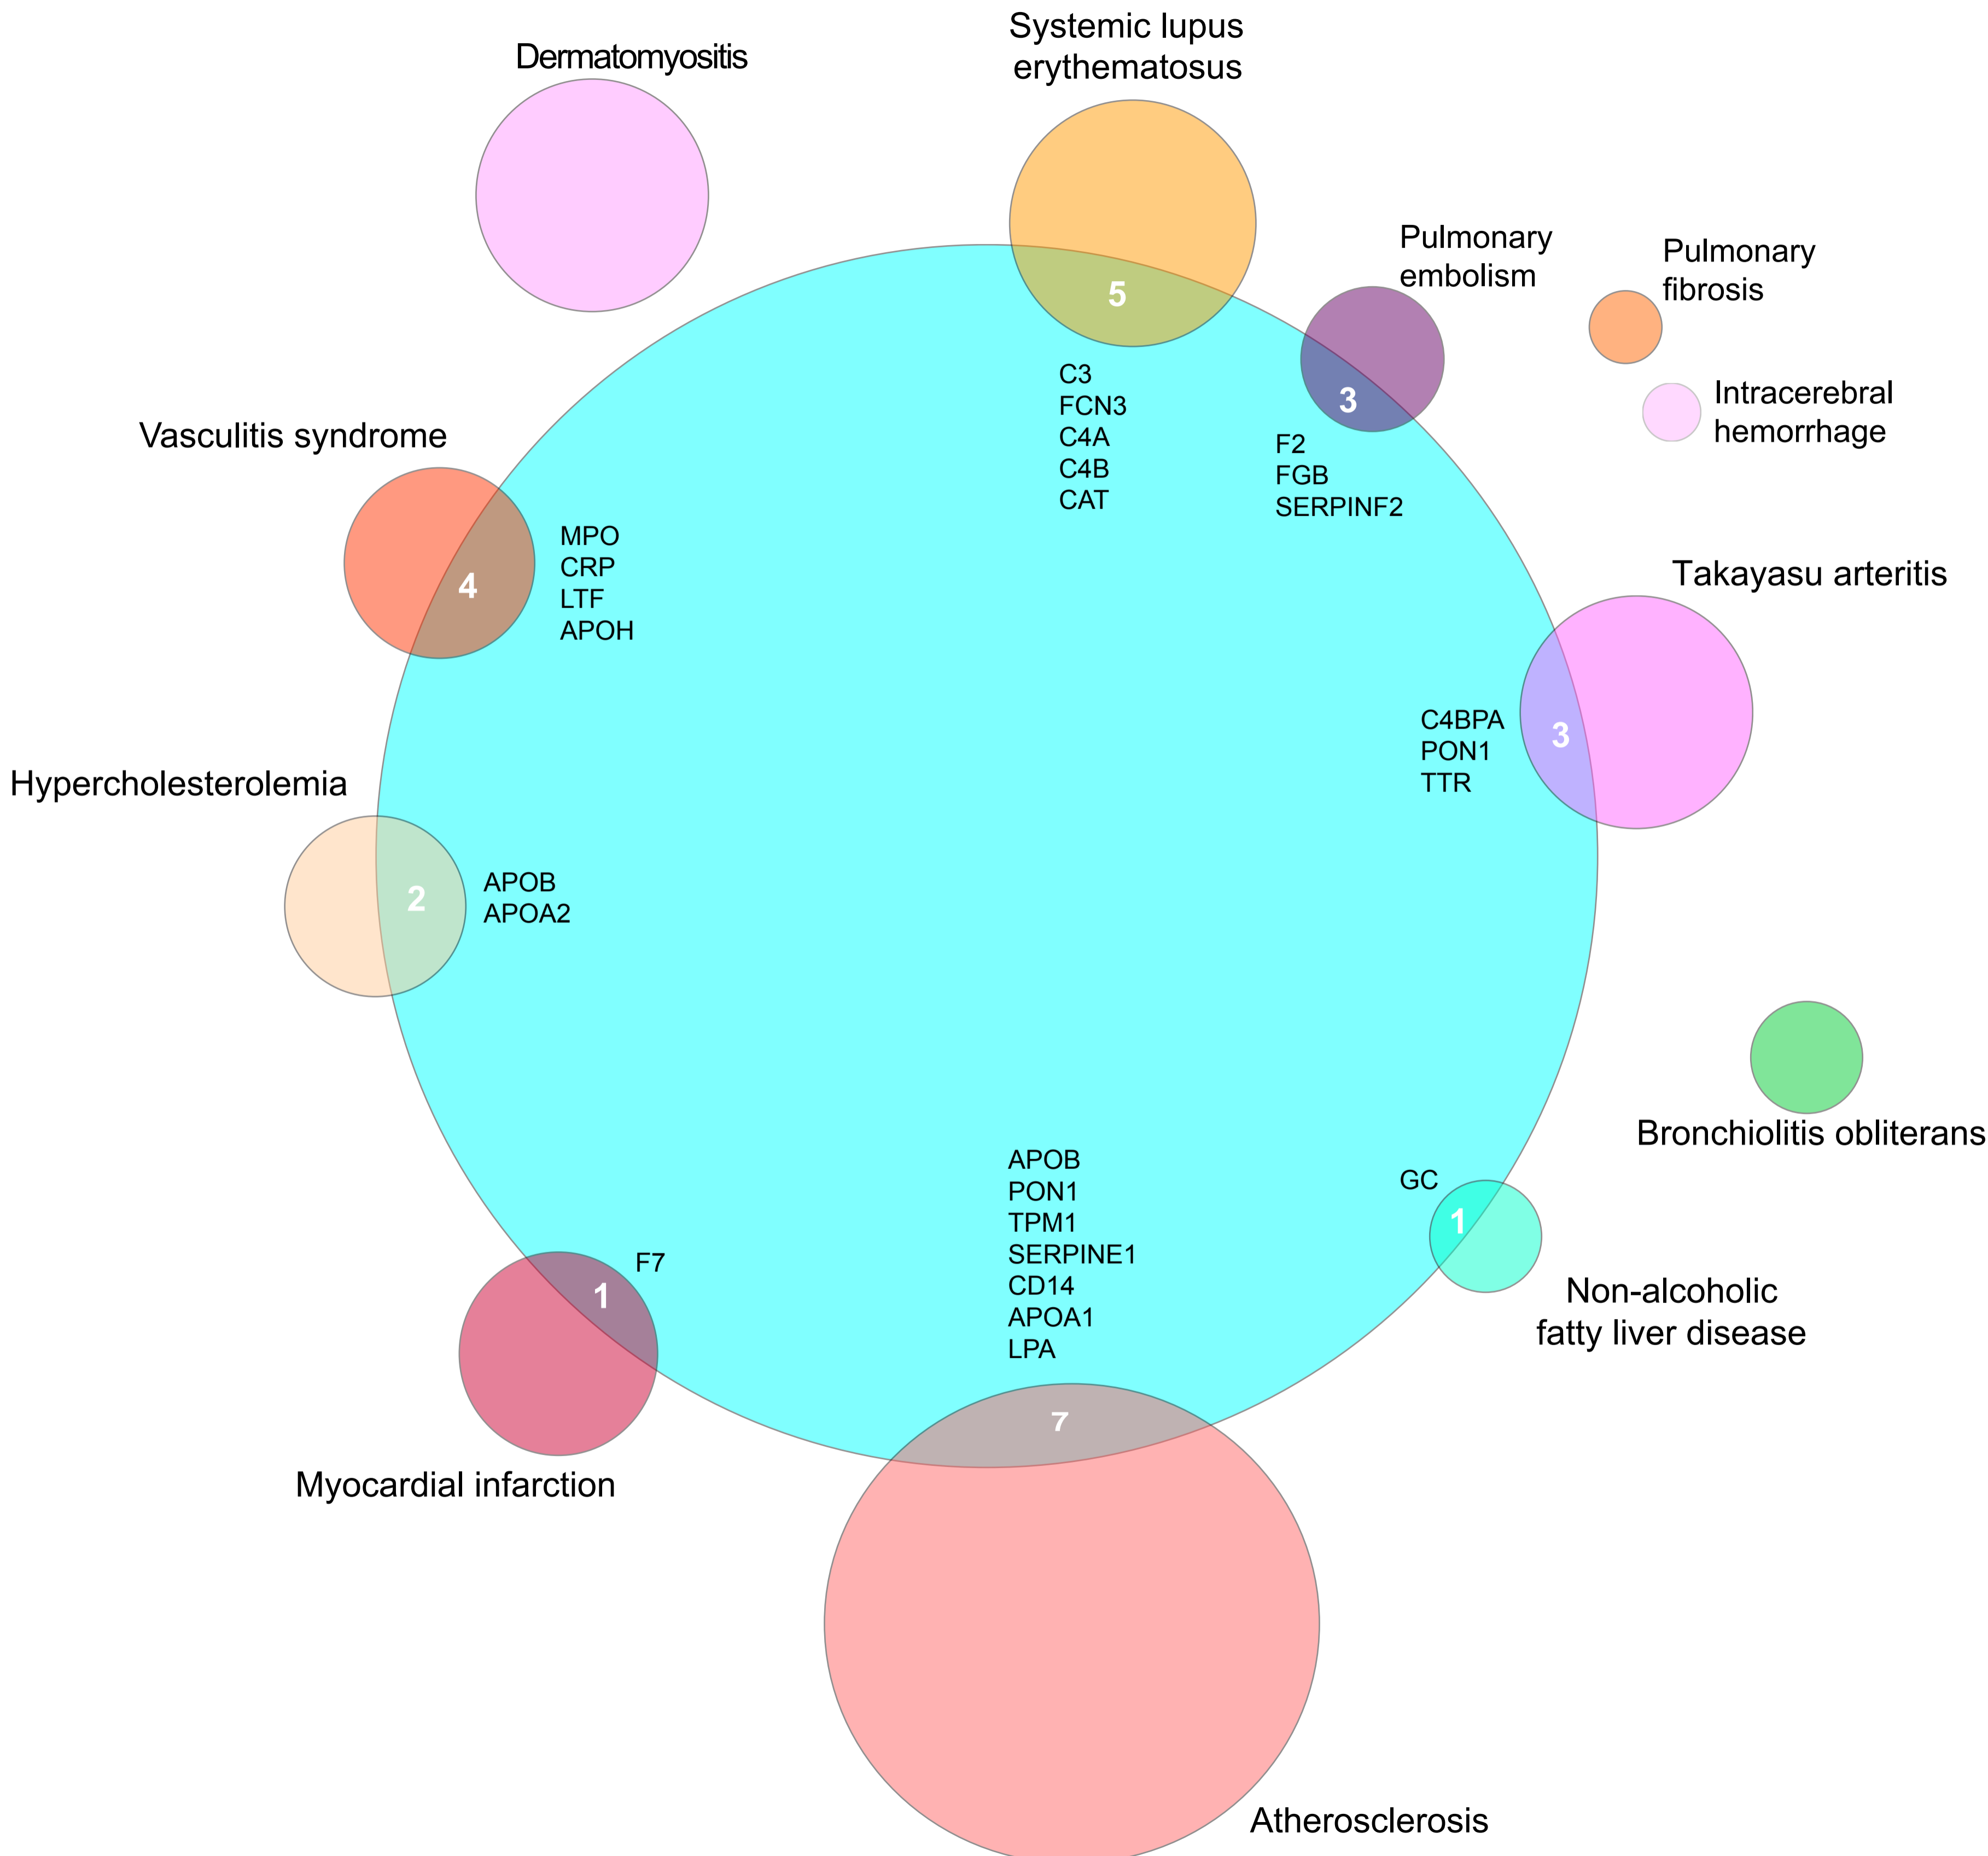

### **Supplemental Figure 18: Gene Overlap between the CAVD Module and Human Diseases**

The direct gene overlap between the calcific disease stage module and the diseases shown in Fig. 6c. The numbers at the intersection of each pair of circles indicates the number of shared genes between the calcific disease stage proteome and the respective disease. The size of the circles indicates the size of the corresponding disease gene set.



1. Itou T, Maldonado N, Yamada I, Goettsch C, Matsumoto J, Aikawa M, Singh S, Aikawa E. Cystathionine  $\gamma$ -lyase accelerates osteoclast differentiation: Identification of a novel regulator of osteoclastogenesis by proteomic analysis. *Arterioscler Thromb Vasc Biol.* 2014;34:626-634.
2. Bastian M, Heymann S, Jacomy M. *Gephi: An open source software for exploring and manipulating networks.* 2009.
3. Käll L, Storey JD, MacCoss MJ, Noble WS. Assigning significance to peptides identified by tandem mass spectrometry using decoy databases. *J Proteome Res.* 2008;7:29-34.
4. Kirchner M, Renard BY, Kothe U, Pappin DJ, Hamprecht FA, Steen H, Steen JA. Computational protein profile similarity screening for quantitative mass spectrometry experiments. *Bioinformatics.* 2010;26:77-83.
5. Old WM, Meyer-Arendt K, Aveline-Wolf L, Pierce KG, Mendoza A, Sevinsky JR, Resing KA, Ahn NG. Comparison of label-free methods for quantifying human proteins by shotgun proteomics. *Molecular & Cellular Proteomics.* 2005;4:1487-1502.
6. Anderle M, Roy S, Lin H, Becker C, Joho K. Quantifying reproducibility for differential proteomics: Noise analysis for protein liquid chromatography-mass spectrometry of human serum. *Bioinformatics.* 2004;20:3575-3582.
7. Love MI, Huber W, Anders S. Moderated estimation of fold change and dispersion for rna-seq data with *deseq2.* *Genome Biol.* 2014;15:550.
8. Benjamini Y, Hochberg Y. Controlling the false discovery rate: A practical and powerful approach to multiple testing. *Journal of the Royal Statistical Society. Series B (Methodological).* 1995;57:289-300.
9. Walt Svd, Colbert SC, Varoquaux G. The numpy array: A structure for efficient numerical computation. *Computing in Science & Engineering.* 2011;13:22-30.
10. Hunter JD. Matplotlib: A 2d graphics environment. *Computing in Science & Engineering.* 2007;9:90-95.
11. Kamburov A, Pentchev K, Galicka H, Wierling C, Lehrach H, Herwig R. Consensuspathdb: Toward a more complete picture of cell biology. *Nucleic Acids Res.* 2011;39:D712-717.
12. Chowdhury S, Sarkar RR. Comparison of human cell signaling pathway databases—evolution, drawbacks and challenges. *Database.* 2015;2015:bau126-bau126.
13. Liu C-C, Tseng Y-T, Li W, Wu C-Y, Mayzus I, Rzhetsky A, Sun F, Waterman M, Chen JJW, Chaudhary PM, Loscalzo J, Crandall E, Zhou XJ. Diseaseconnect: A comprehensive web server for mechanism-based disease–disease connections. *Nucleic Acids Research.* 2014;42:W137-W146.
14. Rappaport N, Nativ N, Stelzer G, Twik M, Guan-Golan Y, Iny Stein T, Bahir I, Belinky F, Morrey CP, Safran M, Lancet D. Malacards: An integrated compendium for diseases and their annotation. *Database.* 2013;2013:bat018-bat018.
15. Menche J, Sharma A, Kitsak M, Ghiassian SD, Vidal M, Loscalzo J, Barabasi AL. Disease networks. Uncovering disease-disease relationships through the incomplete interactome. *Science.* 2015;347:1257601.
16. Hagberg A, Schult D, Swart P. Exploring network structure, dynamics, and function using networkx. *SciPy 2008: Proceedings of the 7th Python in Science Conference.* 2008:11-15.
